# Supplementary material for: One-pot construction of fused polycyclic heteroarenes involving 7-azaindoles and α,β-unsaturated ketones
Source: Royal Society of Chemistry journal article supplement (doi:10.1039/c6ob01437b), 2016-01-01

**Supporting Information for**  
**One-pot construction of fused polycyclic heteroarenes involving**  
**7-azaindoles and  $\alpha,\beta$ -unsaturated ketones**

Shuai-Shuai Li, Wei-Huan Li, Guo-Tai Zhang, Ying-Qi Xia, Chen-Fei Liu, Fu Su,  
Xiao-Mei Zhang, and Lin Dong\*

**Table of Contents**

|                                                                                                                                     |                |
|-------------------------------------------------------------------------------------------------------------------------------------|----------------|
| <b>1. General Methods</b>                                                                                                           | <b>S2</b>      |
| <b>2. General Procedure for Synthesis of Alkylated Products and<br/>Aza-Fused 7-Azaindole Derivatives and Characterization Data</b> | <b>S2-S9</b>   |
| <b>3. Mechanism Study</b>                                                                                                           | <b>S9-S13</b>  |
| <b>4. NMR Spectra of Alkylated Products and Aza-Fused 7-Azaindole<br/>Derivatives and Structure Determination</b>                   | <b>S14-S48</b> |

## 1. General Methods

NMR data were obtained for  $^1\text{H}$  at 400 MHz, and for  $^{13}\text{C}$  at 100 MHz or 151 MHz. Chemical shifts were reported in ppm from tetramethylsilane with the solvent resonance as the internal standard in  $\text{CDCl}_3$  solution. ESI HRMS was recorded on a Waters SYNAPT G2 and Water XEVO G2 Q-ToF. UV detection was monitored at 220 nm. TLC was performed on glass-backed silica plates. Column chromatography was performed on silica gel (200-300 mesh), eluting with ethyl acetate and petroleum ether. All 7-azaindoles and alkynes were commercially available. *N*-substituted 7-azaindoles were prepared according to the literature procedures.<sup>[1]</sup>

## 2. General Procedure for Synthesis of Alkylated Products and Aza-Fused 7-Azaindole Derivatives and Characterization Data

### a. General Procedure for Synthesis of Alkylated Products

1-phenyl-1*H*-pyrrolo[2,3-*b*]pyridine **1a** (19.4 mg, 0.10 mmol), ethyl vinyl ketone **2a** (16.8 mg, 0.20 mmol),  $[\text{Cp}^*\text{Rh}(\text{CH}_3\text{CN})_3(\text{SbF}_6)_2]$  (1.7 mg, 2 mol %) and HOAc (3  $\mu\text{L}$ , 0.5 equiv.) were stirred in toluene (1.0 mL) at 60 °C for 13 h. After completion, the reaction mixture was purified by flash chromatography eluting with ethyl acetate and petroleum ether (1:20) to give the product **4a** as light yellow oil (25.8 mg, 93%).

### b. General Procedure for Synthesis of Aza-Fused 7-Azaindole Derivatives

1-phenyl-1*H*-pyrrolo[2,3-*b*]pyridine **1a** (19.4 mg, 0.10 mmol), ethyl vinyl ketone **2a** (16.8 mg, 0.20 mmol),  $[\text{Cp}^*\text{Rh}(\text{CH}_3\text{CN})_3(\text{SbF}_6)_2]$  (1.7 mg, 2 mol %) and  $\text{Cu}(\text{OAc})_2$  (54.6 mg, 3 equiv.) were stirred in toluene (1.0 mL) at 130 °C for 21 h. After completion, the reaction mixture was purified by flash chromatography eluting with ethyl acetate and petroleum ether (1:40) to give the product **3a** as orange solid (14.2 mg, 52%).

1-(pyrido[3',2':4,5]pyrrolo[1,2-*a*]quinolin-6-yl)propan-1-one **3a** (27.4 mg, 0.1 mmol), benzaldehyde (21.2 mg, 0.2 mmol) and NaOH (50  $\mu\text{L}$ , 6 mol/L) were stirred in MeOH (1 mL) at 50 °C for 36 h. After completion, the reaction mixture was purified by flash chromatography eluting with ethyl acetate and petroleum ether (1:40) to give the product **5** as yellow solid (32.6 mg, 90%).

(*E*)-2-methyl-3-phenyl-1-(pyrido[3',2':4,5]pyrrolo[1,2-*a*]quinolin-6-yl)prop-2-en-1-one **5** (32.6 mg, 0.09 mmol) and  $\text{AlCl}_3$  (48 mg, 0.4 equiv.) were stirred in DCM (1 mL) at room temperature for 48 h. After completion, the reaction mixture was purified by flash chromatography eluting with ethyl acetate and petroleum ether (1:50) to give the product **6** as yellow solid (20.2 mg, 62%) and product **7** as yellow solid (9.8 mg, 30%)

1-(pyrido[3',2':4,5]pyrrolo[1,2-*a*]quinolin-6-yl)propan-1-one (**3a**). Orange solid, 21 h, 52% yield;

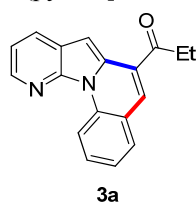

$^1\text{H}$  NMR (400 MHz,  $\text{CDCl}_3$ ):  $\delta$  10.12 (d,  $J = 8.4$  Hz, 1H), 8.55 (d,  $J = 4.0$  Hz, 1H), 8.13 (d,  $J = 7.6$  Hz, 1H), 7.82 (s, 1H), 7.72-7.69 (m, 1H), 7.63-7.61 (m, 2H), 7.33-7.28 (m, 2H), 3.07 (q,  $J = 7.2$  Hz, 2H), 1.28 (t,  $J = 7.2$  Hz, 3H) ppm;  
 $^{13}\text{C}$  NMR (100 MHz,  $\text{CDCl}_3$ ):  $\delta$  199.3, 145.7, 142.2, 137.2, 132.0, 131.7, 130.9, 129.8, 129.0, 126.7, 123.5, 122.6, 121.5, 118.3, 118.0, 97.2, 32.1, 8.5

ppm. ESI HRMS: calcd. for C<sub>18</sub>H<sub>14</sub>N<sub>2</sub>O+Na 297.1004, found 297.1009.

phenyl(pyrido[3',2':4,5]pyrrolo[1,2-a]quinolin-6-yl)methanone (**3b**). Orange solid, 17 h, 50% yield;

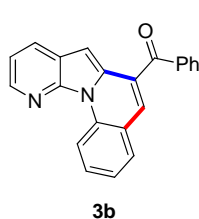

<sup>1</sup>H NMR (400 MHz, CDCl<sub>3</sub>): δ 10.2 (d, *J* = 8.8 Hz, 1H), 8.60-8.59 (m, 1H), 8.16-8.14 (m, 1H), 7.92 (d, *J* = 7.2 Hz, 2H), 7.78-7.74 (m, 1H), 7.65-7.62 (m, 2H), 7.54-7.51 (m, 3H), 7.37-7.33 (m, 2H), 7.24 (d, *J* = 3.6 Hz, 1H) ppm; <sup>13</sup>C NMR (100 MHz, CDCl<sub>3</sub>): δ 194.5, 145.9, 142.4, 137.9, 137.0, 132.8, 132.8, 132.0, 131.8, 129.9, 129.8, 129.0, 128.5, 127.7, 123.7, 122.3, 121.7, 118.4, 118.1, 96.3 ppm. ESI HRMS: calcd. for C<sub>22</sub>H<sub>14</sub>N<sub>2</sub>O+Na 345.1004, found

345.0995.

(4-bromophenyl)(pyrido[3',2':4,5]pyrrolo[1,2-a]quinolin-6-yl)methanone (**3c**). Orange solid, 23 h,

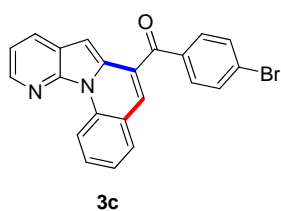

56% yield; <sup>1</sup>H NMR (400 MHz, CDCl<sub>3</sub>): δ 10.22 (d, *J* = 8.4 Hz, 1H), 8.61 (d, *J* = 3.6 Hz, 1H), 8.16 (d, *J* = 8.0 Hz, 1H), 7.80-7.77 (m, 3H), 7.68-7.65 (m, 3H), 7.51 (s, 1H), 7.39-7.35 (m, 2H), 7.25-7.21 (m, 1H) ppm; <sup>13</sup>C NMR (100 MHz, CDCl<sub>3</sub>): δ 193.4, 145.9, 142.5, 137.0, 136.6, 132.5, 132.0, 132.0, 131.9, 131.3, 129.9, 129.0, 128.0, 127.4, 123.8, 122.3, 121.6, 118.4, 118.2, 96.3 ppm. ESI HRMS: calcd. for

C<sub>22</sub>H<sub>13</sub>BrN<sub>2</sub>O+Na 423.0109, found 423.0108, 425.0101.

(4-methoxyphenyl)(pyrido[3',2':4,5]pyrrolo[1,2-a]quinolin-6-yl)methanone (**3d**). Orange solid, 70

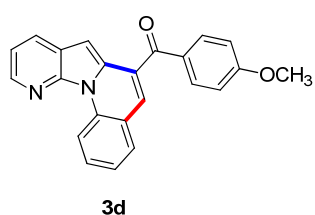

h, 44% yield; <sup>1</sup>H NMR (400 MHz, CDCl<sub>3</sub>): δ 10.21 (d, *J* = 8.8 Hz, 1H), 8.60 (d, *J* = 3.6 Hz, 1H), 8.13 (d, *J* = 7.6 Hz, 1H), 7.96 (d, *J* = 8.8 Hz, 2H), 7.76 (t, *J* = 8.0 Hz, 1H), 7.67 (d, *J* = 7.6 Hz, 1H), 7.48 (s, 1H), 7.39-7.33 (m, 2H), 7.07 (s, 1H), 7.00 (d, *J* = 8.8 Hz, 2H), 3.91 (s, 3H) ppm; <sup>13</sup>C NMR (100 MHz, CDCl<sub>3</sub>): δ 193.1, 163.7, 146.0, 142.3, 136.8, 133.1, 132.4, 131.4, 130.2, 130.0, 129.5, 128.9,

128.6, 123.7, 122.2, 121.9, 118.4, 118.1, 113.8, 95.9, 55.5 ppm. ESI HRMS: calcd. for C<sub>23</sub>H<sub>16</sub>N<sub>2</sub>O<sub>2</sub>+H 353.1290, found 353.1308.

1-(2-chloropyrido[3',2':4,5]pyrrolo[1,2-a]quinolin-6-yl)propan-1-one (**3e**). Orange solid, 35 h, 60%

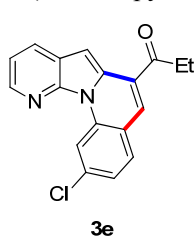

yield; <sup>1</sup>H NMR (400 MHz, CDCl<sub>3</sub>): δ 10.17 (s, 1H), 8.55-8.54 (m, 1H), 8.11 (d, *J* = 8.0 Hz, 1H), 7.71 (s, 1H), 7.57 (s, 1H), 7.49 (d, *J* = 8.4 Hz, 1H), 7.34-7.31 (m, 1H), 7.23 (d, *J* = 8.4 Hz, 1H), 3.04 (q, *J* = 7.2 Hz, 2H), 1.28 (t, *J* = 7.2 Hz, 3H) ppm; <sup>13</sup>C NMR (100 MHz, CDCl<sub>3</sub>): δ 199.0, 145.5, 142.5, 137.8, 137.4, 131.3, 130.4, 129.7, 129.1, 126.7, 123.9, 122.6, 119.9, 118.3, 118.3, 97.8, 32.1, 8.4 ppm. ESI HRMS: calcd. for C<sub>18</sub>H<sub>13</sub>ClN<sub>2</sub>O+H 309.0795, found 309.0787,

311.0755.

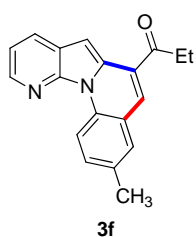

1-(3-methylpyrido[3',2':4,5]pyrrolo[1,2-a]quinolin-6-yl)propan-1-one (**3f**). Light orange solid, 22 h, 66% yield; <sup>1</sup>H NMR (400 MHz, CDCl<sub>3</sub>): δ 9.99 (d, *J* = 8.4 Hz, 1H), 8.56-8.55 (m, 1H), 8.15 (d, *J* = 8.0 Hz, 1H), 7.82-7.80 (m, 1H), 7.62 (s, 1H), 7.54-7.51 (m, 1H), 7.43 (s, 1H), 7.33-7.30 (m, 1H), 3.10-3.05 (m, 2H), 2.45 (s, 3H), 1.29 (t, *J* = 7.2 Hz, 3H) ppm; <sup>13</sup>C NMR (100 MHz, CDCl<sub>3</sub>):

$\delta$  199.4, 145.5, 142.1, 135.2, 133.1, 133.0, 131.7, 131.0, 129.7, 128.9, 126.7, 122.5, 121.5, 118.1, 117.8, 96.9, 32.2, 20.8, 8.5 ppm. ESI HRMS: calcd. for  $C_{19}H_{16}N_2O+H$  289.1341, found 289.1331.

1-(8-chloropyrido[3',2':4,5]pyrrolo[1,2-a]quinolin-6-yl)propan-1-one (**3g**). Light orange solid, 35 h, 70% yield;  $^1H$  NMR (400 MHz,  $CDCl_3$ ):  $\delta$  10.01 (d,  $J = 5.6$  Hz, 1H), 8.39 (d,  $J = 3.2$  Hz, 1H), 7.84 (s, 1H), 7.71-7.67 (m, 2H), 7.64 (d,  $J = 4.8$  Hz, 1H), 7.35-7.32 (m, 2H), 3.08 (q,  $J = 4.8$  Hz, 2H), 1.30 (t,  $J = 4.8$  Hz, 3H) ppm;  $^{13}C$  NMR (100 MHz,  $CDCl_3$ ):  $\delta$  198.9, 145.8, 142.1, 136.8, 136.0, 132.1, 132.0, 131.4, 129.9, 126.5, 124.0, 121.9, 121.6, 118.3, 117.9, 95.6, 32.1, 8.4 ppm. ESI HRMS: calcd. for  $C_{18}H_{13}ClN_2O+H$  309.0795, found 309.0783, 311.0749.

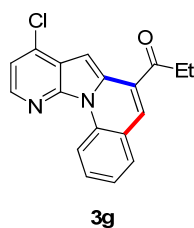

1-(9-bromopyrido[3',2':4,5]pyrrolo[1,2-a]quinolin-6-yl)propan-1-one (**3h**). Light orange solid, 35 h, 46% yield;  $^1H$  NMR (400 MHz,  $CDCl_3$ ):  $\delta$  9.99 (d,  $J = 5.2$  Hz, 1H), 8.53 (s, 1H), 8.22 (s, 1H), 7.91 (s, 1H), 7.75-7.69 (m, 2H), 7.56 (s, 1H), 7.39-7.36 (m, 1H), 3.11 (q,  $J = 4.8$  Hz, 2H), 1.30 (t,  $J = 4.8$  Hz, 3H) ppm;  $^{13}C$  NMR (100 MHz,  $CDCl_3$ ):  $\delta$  199.1, 143.8, 142.6, 136.8, 132.9, 132.3, 131.6, 130.7, 130.0, 126.5, 124.1, 123.9, 121.5, 118.2, 114.1, 96.6, 32.1, 8.4 ppm. ESI HRMS: calcd. for  $C_{18}H_{13}BrN_2O+H$  353.0290, found 353.0280, 355.0259.

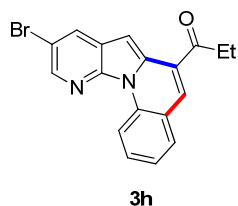

1-(9-phenylpyrido[3',2':4,5]pyrrolo[1,2-a]quinolin-6-yl)propan-1-one (**3i**). Orange solid, 21 h, 43% yield;  $^1H$  NMR (400 MHz,  $CDCl_3$ ):  $\delta$  10.1 (s, 1H), 8.77 (s, 1H), 8.27 (s, 1H), 7.83 (s, 1H), 7.73-7.69 (m, 3H), 7.64 (s, 2H), 7.50 (t,  $J = 4.8$  Hz, 2H), 7.40 (t,  $J = 4.8$  Hz, 1H), 7.32 (t,  $J = 4.8$  Hz, 1H), 3.08 (q,  $J = 4.8$  Hz, 2H), 1.29 (t,  $J = 4.8$  Hz, 3H) ppm;  $^{13}C$  NMR (100 MHz,  $CDCl_3$ ):  $\delta$  199.2, 145.1, 141.6, 139.2, 137.1, 132.3, 132.1, 131.4, 131.0, 129.9, 129.0, 127.5, 127.3, 126.9, 126.7, 123.6, 122.5, 121.5, 118.2, 97.5, 32.1, 8.5 ppm. ESI HRMS: calcd. for  $C_{24}H_{18}N_2O+H$  351.1497, found 351.1484.

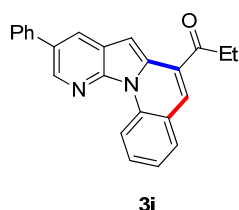

1-(2-(1*H*-pyrrolo[2,3-*b*]pyridin-1-yl)phenyl)pentan-3-one (**4a**). Light yellow oil, 13 h, 93% yield;  $^1H$  NMR (400 MHz,  $CDCl_3$ ):  $\delta$  8.18 (d,  $J = 4.4$  Hz, 1H), 7.83 (d,  $J = 7.6$  Hz, 1H), 7.25 (d,  $J = 3.6$  Hz, 2H), 7.22-7.14 (m, 3H), 6.97-6.93 (m, 1H), 6.50-6.49 (m, 1H), 2.58 (t,  $J = 7.6$  Hz, 2H), 2.33 (t,  $J = 7.6$  Hz, 2H), 2.01 (q,  $J = 7.2$  Hz, 2H), 0.74 (t,  $J = 7.6$  Hz, 3H) ppm;  $^{13}C$  NMR (100 MHz,  $CDCl_3$ ):  $\delta$  210.1, 148.5, 143.7, 139.2, 136.9, 130.2, 129.4, 129.1, 128.9, 127.3, 120.4, 116.3, 101.1, 42.4, 35.6, 25.7, 7.6 ppm. ESI HRMS: calcd. for  $C_{18}H_{18}N_2O+Na$  301.1317, found 301.1325.

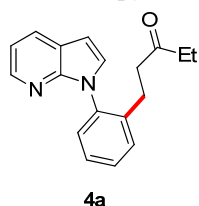

1-(3-chloro-2-(1*H*-pyrrolo[2,3-*b*]pyridin-1-yl)phenyl)pentan-3-one (**4b**). Light yellow oil, 39 h, 73% yield;  $^1H$  NMR (400 MHz,  $CDCl_3$ ):  $\delta$  8.31 (d,  $J = 4.0$  Hz, 1H), 7.99 (d,  $J = 6.8$  Hz, 1H), 7.42 (d,  $J = 7.6$  Hz, 1H), 7.37-7.30 (m, 2H), 7.20 (d,  $J = 3.6$  Hz, 1H), 7.13-7.10 (m, 1H), 6.69 (d,  $J = 3.6$  Hz, 1H), 2.71-2.64 (m, 1H), 2.61-2.54 (m, 1H), 2.47 (t,  $J = 7.6$  Hz, 2H), 2.21-2.10 (m, 2H), 0.88 (t,  $J = 7.6$  Hz, 3H) ppm;  $^{13}C$  NMR (100 MHz,  $CDCl_3$ ):  $\delta$  209.9, 148.2, 143.8, 142.6, 134.5, 134.4, 129.9,

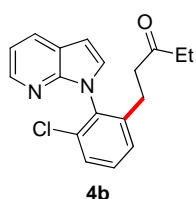

129.2, 128.9, 128.5, 128.2, 120.3, 116.5, 101.7, 42.4, 35.7, 26.0, 7.6 ppm. ESI HRMS: calcd. for  $C_{18}H_{17}ClN_2O+H$  313.1108, found 313.1095, 315.1076.

1-(4-chloro-2-(1*H*-pyrrolo[2,3-*b*]pyridin-1-yl)phenyl)pentan-3-one (**4c**). Light yellow oil, 12 h, 96%

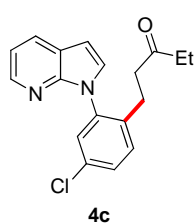

$C_{18}H_{17}ClN_2O+Na$  335.0927, found 335.0920, 337.0916.

1-(4-methyl-2-(1*H*-pyrrolo[2,3-*b*]pyridin-1-yl)phenyl)pentan-3-one (**4d**). Yellow oil, 17 h, 87%

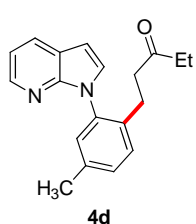

ESI HRMS: calcd. for  $C_{19}H_{20}N_2O+Na$  315.1473, found 315.1474.

1-(5-fluoro-2-(1*H*-pyrrolo[2,3-*b*]pyridin-1-yl)phenyl)pentan-3-one (**4e**). Yellow oil, 11 h, 95%

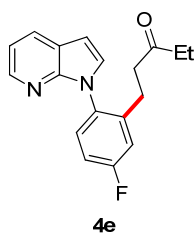

114.1 (d,  $J = 22.4$  Hz), 101.3, 41.9, 35.7, 25.5, 7.6 ppm. ESI HRMS: calcd. for  $C_{18}H_{17}FN_2O+Na$  319.1223, found 319.1219.

1-(5-chloro-2-(1*H*-pyrrolo[2,3-*b*]pyridin-1-yl)phenyl)pentan-3-one (**4f**). Light yellow oil, 11 h, 78%

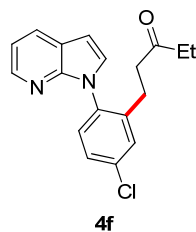

ESI HRMS: calcd. for  $C_{18}H_{17}ClN_2O+Na$  335.0927, found 335.0930, 337.0916.

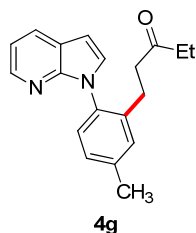

1-(5-methyl-2-(1*H*-pyrrolo[2,3-*b*]pyridin-1-yl)phenyl)pentan-3-one (**4g**). Light yellow oil, 15 h, 84% yield;  $^1H$  NMR (400 MHz,  $CDCl_3$ ):  $\delta$  8.23 (d,  $J = 3.6$  Hz, 1H), 7.89 (d,  $J = 7.2$  Hz, 1H), 7.19 (d,  $J = 3.2$  Hz, 1H), 7.13-1.07 (m, 3H), 7.03-7.00 (m, 1H), 6.55 (d,  $J = 2.8$  Hz, 1H), 2.58 (t,  $J = 7.2$  Hz, 2H), 2.38 (t,  $J =$

8.0 Hz, 2H), 2.33 (s, 3H), 2.07 (q,  $J = 7.2$  Hz, 2H), 0.81 (t,  $J = 7.6$  Hz, 3H) ppm;  $^{13}\text{C}$  NMR (100 MHz,  $\text{CDCl}_3$ ):  $\delta$  210.3, 148.5, 143.6, 138.8, 138.7, 134.1, 130.7, 129.4, 128.9, 128.6, 127.9, 120.3, 116.1, 100.8, 42.5, 35.6, 25.6, 21.1, 7.63 ppm. ESI HRMS: calcd. for  $\text{C}_{19}\text{H}_{20}\text{N}_2\text{O}+\text{H}$  293.1654, found 293.1649.

1-(3-(1*H*-pyrrolo[2,3-*b*]pyridin-1-yl)naphthalen-2-yl)pentan-3-one (**4h**). Brown solid, 33 h, 71% yield;

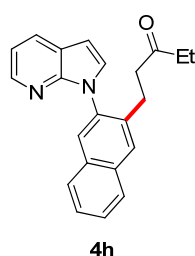

$^1\text{H}$  NMR (400 MHz,  $\text{CDCl}_3$ ):  $\delta$  8.30 (d,  $J = 4.4$  Hz, 1H), 7.99 (d,  $J = 7.6$  Hz, 1H), 7.84-7.77 (m, 4H), 7.51-7.43 (m, 2H), 7.35 (d,  $J = 3.6$  Hz, 1H), 7.12-7.09 (m, 1H), 6.66 (d,  $J = 3.2$  Hz, 1H), 2.84 (t,  $J = 7.6$  Hz, 2H), 2.49 (t,  $J = 7.6$  Hz, 2H), 2.14 (q,  $J = 7.2$  Hz, 2H), 0.87 (t,  $J = 7.2$  Hz, 3H) ppm;  $^{13}\text{C}$  NMR (100 MHz,  $\text{CDCl}_3$ ):  $\delta$  210.3, 148.8, 143.8, 136.9, 135.4, 133.4, 132.3, 129.7, 129.0, 128.8, 127.8, 127.7, 127.3, 126.8, 126.1, 120.5, 116.4, 101.2, 42.4, 35.7, 26.0, 7.7 ppm. ESI HRMS: calcd. for  $\text{C}_{22}\text{H}_{20}\text{N}_2\text{O}+\text{Na}$  351.1473, found 351.1468.

1-(2-(3-phenyl-1*H*-pyrrolo[2,3-*b*]pyridin-1-yl)phenyl)pentan-3-one (**4i**). Light yellow oil, 20 h, 77% yield;

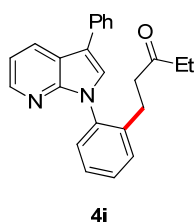

$^1\text{H}$  NMR (400 MHz,  $\text{CDCl}_3$ ):  $\delta$  8.38 (d,  $J = 3.6$  Hz, 1H), 8.32 (d,  $J = 7.6$  Hz, 1H), 7.71 (d,  $J = 7.6$  Hz, 2H), 7.52-7.48 (m, 3H), 7.43-7.41 (m, 2H), 7.39-7.33 (m, 3H), 7.22-7.19 (m, 1H), 2.79 (t,  $J = 7.2$  Hz, 2H), 2.55 (t,  $J = 8.0$  Hz, 2H), 2.20 (q,  $J = 7.2$  Hz, 2H), 0.91 (t,  $J = 7.2$  Hz, 3H) ppm;  $^{13}\text{C}$  NMR (100 MHz,  $\text{CDCl}_3$ ):  $\delta$  210.3, 149.0, 144.1, 139.2, 136.6, 134.5, 130.2, 129.0, 129.0, 128.9, 128.5, 127.4, 127.1, 126.5, 126.4, 118.6, 116.7, 116.6, 42.5, 35.7, 25.7, 7.7 ppm. ESI HRMS: calcd. for  $\text{C}_{24}\text{H}_{22}\text{N}_2\text{O}+\text{Na}$  377.1630, found 377.1636.

1-(2-(3-acetyl-1*H*-pyrrolo[2,3-*b*]pyridin-1-yl)phenyl)pentan-3-one (**4j**). Light pink solid, 17 h, 93% yield;

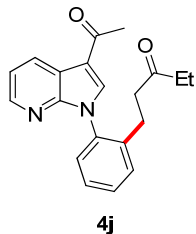

$^1\text{H}$  NMR (400 MHz,  $\text{CDCl}_3$ ):  $\delta$  8.71 (d,  $J = 7.6$  Hz, 1H), 8.36 (d,  $J = 4.4$  Hz, 1H), 7.99 (s, 1H), 7.48-7.43 (m, 2H), 7.41-7.36 (m, 1H), 7.32-7.25 (m, 2H), 2.68 (t,  $J = 6.8$  Hz, 2H), 2.58-2.54 (m, 5H), 2.20 (q,  $J = 7.2$  Hz, 2H), 0.90 (t,  $J = 7.2$  Hz, 3H) ppm;  $^{13}\text{C}$  NMR (100 MHz,  $\text{CDCl}_3$ ):  $\delta$  209.8, 193.1, 149.1, 145.2, 139.0, 135.6, 135.6, 131.3, 130.1, 129.7, 128.6, 127.4, 118.9, 118.3, 116.5, 42.2, 35.7, 27.2, 25.1, 7.6 ppm. ESI HRMS: calcd. for  $\text{C}_{20}\text{H}_{20}\text{N}_2\text{O}_2+\text{Na}$  343.1422, found 343.1420.

1-(2-(4-(3,4,5-trifluorophenyl)-1*H*-pyrrolo[2,3-*b*]pyridin-1-yl)phenyl)pentan-3-one (**4k**). Yellow oil, 20 h, 78% yield;

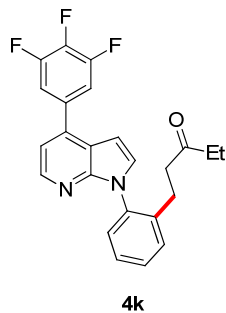

$^1\text{H}$  NMR (400 MHz,  $\text{CDCl}_3$ ):  $\delta$  8.36 (d,  $J = 4.8$  Hz, 1H), 7.41-7.34 (m, 6H), 7.30 (d,  $J = 7.6$  Hz, 1H), 7.11 (d,  $J = 4.8$  Hz, 1H), 6.77 (d,  $J = 3.6$  Hz, 1H), 2.71 (t,  $J = 7.2$  Hz, 2H), 2.55 (t,  $J = 7.6$  Hz, 2H), 2.21 (q,  $J = 7.2$  Hz, 2H), 0.91 (t,  $J = 7.2$  Hz, 3H) ppm;  $^{13}\text{C}$  NMR (100 MHz,  $\text{CDCl}_3$ ):  $\delta$  210.2, 152.7 (dd,  $J_1 = 4.1$  Hz,  $J_2 = 10.1$  Hz), 150.2 (dd,  $J_1 = 4.0$  Hz,  $J_2 = 9.9$  Hz), 149.1, 144.1, 141.1 (t,  $J = 15.2$  Hz), 139.1, 139.0, 138.6 (t,  $J = 17.1$  Hz), 136.6, 134.9-134.7 (m), 130.5, 130.1, 129.2, 128.8, 127.3, 118.0, 115.2, 112.6 (dd,  $J_1 = 6.1$  Hz,  $J_2 = 15.9$  Hz), 99.7, 42.5, 35.8, 25.4, 7.6 ppm. ESI HRMS: calcd. for  $\text{C}_{24}\text{H}_{19}\text{F}_3\text{N}_2\text{O}+\text{Na}$  431.1347, found 431.1346.

1-(2-(4-chloro-1*H*-pyrrolo[2,3-*b*]pyridin-1-yl)phenyl)pentan-3-one (**4i**). Light yellow oil, 32 h, 81%

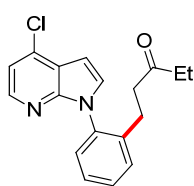

**4i**

yield; <sup>1</sup>H NMR (400 MHz, CDCl<sub>3</sub>): δ 8.16 (d, *J* = 5.2 Hz, 1H), 7.41-7.35 (m, 2H), 7.33-7.30 (m, 2H), 7.25 (d, *J* = 7.6 Hz, 1H), 7.11 (d, *J* = 5.2 Hz, 1H), 6.72 (d, *J* = 3.6 Hz, 1H), 2.66 (t, *J* = 7.2 Hz, 2H), 2.46 (t, *J* = 7.6 Hz, 2H), 2.17 (q, *J* = 7.2 Hz, 2H), 0.88 (t, *J* = 7.2 Hz, 3H) ppm; <sup>13</sup>C NMR (100 MHz, CDCl<sub>3</sub>): δ 210.1, 149.0, 144.0, 139.1, 136.4, 136.3, 130.2, 130.0, 129.2, 128.7,

127.3, 119.8, 116.5, 99.6, 42.3, 35.8, 25.5, 7.6 ppm. ESI HRMS: calcd. for C<sub>18</sub>H<sub>17</sub>ClN<sub>2</sub>O+Na 335.0927, found 335.0928, 337.0923.

1-(2-(5-phenyl-1*H*-pyrrolo[2,3-*b*]pyridin-1-yl)phenyl)pentan-3-one (**4m**). Light yellow oil, 11 h,

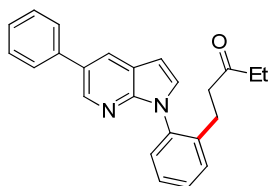

**4m**

94% yield; <sup>1</sup>H NMR (400 MHz, CDCl<sub>3</sub>): δ 8.45 (d, *J* = 2.0 Hz, 1H), 8.05 (d, *J* = 2.0 Hz, 1H), 7.52 (d, *J* = 7.2 Hz, 2H), 7.38-7.34 (m, 2H), 7.31-7.30 (m, 2H), 7.28-7.21 (m, 4H), 6.58 (d, *J* = 3.2 Hz, 1H), 2.65 (t, *J* = 8.0 Hz, 2H), 2.41 (t, *J* = 8.0 Hz, 2H), 2.07 (q, *J* = 7.2 Hz, 2H), 0.79 (t, *J* = 7.2 Hz, 3H) ppm; <sup>13</sup>C NMR (100 MHz, CDCl<sub>3</sub>): δ 210.3, 148.1,

143.1, 139.5, 139.2, 136.8, 130.2, 130.1, 129.0, 128.9, 128.9, 127.5, 127.4, 127.4, 127.1, 120.5, 101.4, 42.5, 35.8, 25.7, 7.7 ppm. ESI HRMS: calcd. for C<sub>24</sub>H<sub>22</sub>N<sub>2</sub>O+H 355.1810, found 355.1794.

4-(1-(2-(3-oxopentyl)phenyl)-1*H*-pyrrolo[2,3-*b*]pyridin-5-yl)benzonitrile (**4n**). Light yellow solid,

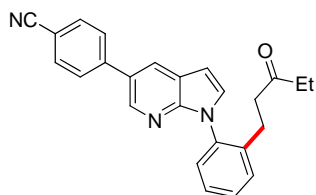

**4n**

46 h, 75% yield; <sup>1</sup>H NMR (400 MHz, CDCl<sub>3</sub>): δ 8.53 (d, *J* = 2.0 Hz, 1H), 8.18 (d, *J* = 2.0 Hz, 1H), 7.76-7.71 (m, 4H), 7.44-7.41 (m, 2H), 7.39-7.35 (m, 2H), 7.33-7.31 (m, 1H), 6.72 (d, *J* = 3.6 Hz, 1H), 2.73 (t, *J* = 7.6 Hz, 2H), 2.53 (t, *J* = 7.6 Hz, 2H), 2.21 (q, *J* = 7.2 Hz, 2H), 0.90 (t, *J* = 7.6 Hz, 3H) ppm; <sup>13</sup>C NMR (100 MHz, CDCl<sub>3</sub>): δ

210.1, 148.5, 144.1, 142.8, 139.1, 136.5, 132.7, 130.9, 130.1, 129.2, 128.7, 128.1, 127.8, 127.7, 127.4, 120.5, 118.9, 110.6, 101.6, 42.4, 35.8, 25.5, 7.69 ppm. ESI HRMS: calcd. for C<sub>25</sub>H<sub>21</sub>N<sub>3</sub>O+Na 402.1582, found 402.1585.

1-(2-(5-(thiophen-2-yl)-1*H*-pyrrolo[2,3-*b*]pyridin-1-yl)phenyl)pentan-3-one (**4o**). Light yellow oil,

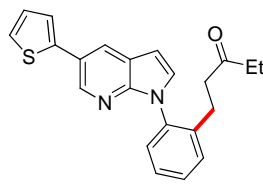

**4o**

20 h, 76% yield; <sup>1</sup>H NMR (400 MHz, CDCl<sub>3</sub>): δ 8.57 (s, 1H), 8.14 (s, 1H), 7.43-7.39 (m, 5H), 7.37-7.29 (m, 3H), 6.65 (d, *J* = 3.2 Hz, 1H), 2.73 (t, *J* = 7.6 Hz, 2H), 2.48 (t, *J* = 7.6 Hz, 2H), 2.17 (q, *J* = 7.6 Hz, 2H), 0.88 (t, *J* = 7.2 Hz, 3H) ppm; <sup>13</sup>C NMR (100 MHz, CDCl<sub>3</sub>): δ 210.2, 147.9, 142.6, 140.4, 139.1, 136.8, 130.2, 129.0, 128.8, 127.3,

126.7, 126.5, 125.1, 120.4, 119.8, 101.3, 42.4, 35.7, 25.7, 7.7 ppm. ESI HRMS: calcd. for C<sub>22</sub>H<sub>20</sub>N<sub>2</sub>OS+Na 383.1194, found 383.1199.

(*E*)-methyl 3-(1-(2-(3-oxopentyl)phenyl)-1*H*-pyrrolo[2,3-*b*]pyridin-5-yl)acrylate (**4p**). Light

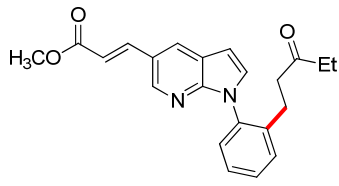

**4p**

yellow oil, 17 h, 82% yield; <sup>1</sup>H NMR (400 MHz, CDCl<sub>3</sub>): δ 8.46 (d, *J* = 1.2 Hz, 1H), 8.16 (d, *J* = 1.6 Hz, 1H), 7.83 (d, *J* = 16.0 Hz, 1H), 7.42-7.27 (m, 5H), 6.68 (d, *J* = 3.2 Hz, 1H), 6.49 (d, *J* = 1.6 Hz, 1H), 3.82 (s, 3H), 2.69 (t, *J* = 8.0 Hz, 2H), 2.49 (t, *J* = 8.0 Hz, 2H), 2.19 (q, *J* = 7.2 Hz, 2H), 0.89 (t, *J* = 7.2 Hz, 3H) ppm; <sup>13</sup>C

NMR (100 MHz, CDCl<sub>3</sub>):  $\delta$  210.1, 167.4, 149.2, 144.7, 143.1, 139.0, 136.3, 131.0, 130.2, 129.2, 128.7, 127.9, 127.4, 123.3, 120.5, 116.4, 101.8, 51.7, 42.4, 35.8, 25.5, 7.6 ppm. ESI HRMS: calcd. for C<sub>22</sub>H<sub>22</sub>N<sub>2</sub>O<sub>3</sub>+Na 385.1528, found 385.1521.

1-(2-(5-bromo-1*H*-pyrrolo[2,3-*b*]pyridin-1-yl)phenyl)pentan-3-one (**4q**). Light yellow oil, 21 h, 92%

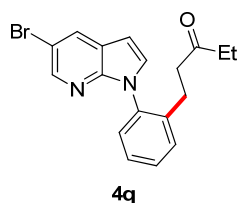

**4q**

yield; <sup>1</sup>H NMR (400 MHz, CDCl<sub>3</sub>):  $\delta$  8.22 (d, *J* = 2.0 Hz, 1H), 8.01 (d, *J* = 2.0 Hz, 1H), 7.33-7.24 (m, 3H), 7.21 (d, *J* = 3.6 Hz, 1H), 7.18 (d, *J* = 7.6 Hz, 1H), 6.50 (d, *J* = 3.2 Hz, 1H), 2.59 (t, *J* = 7.2 Hz, 2H), 2.39 (t, *J* = 8.0 Hz, 2H), 2.11 (q, *J* = 7.6 Hz, 2H), 0.82 (t, *J* = 7.6 Hz, 3H) ppm; <sup>13</sup>C NMR (100 MHz, CDCl<sub>3</sub>):  $\delta$  210.1, 146.8, 144.2, 139.1, 136.3, 131.1, 130.9, 130.2, 129.2, 128.7, 127.3, 122.0, 112.3, 100.6, 42.4, 35.8, 25.5, 7.68 ppm.

ESI HRMS: calcd. for C<sub>18</sub>H<sub>17</sub>BrN<sub>2</sub>O+Na 379.0422, found 379.0421, 381.0400.

3-(2-(1*H*-pyrrolo[2,3-*b*]pyridin-1-yl)phenyl)-1-phenylpropan-1-one (**4r**). Yellow oil, 21 h, 86%

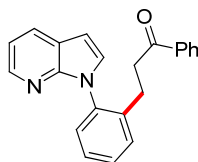

**4r**

yield; <sup>1</sup>H NMR (400 MHz, CDCl<sub>3</sub>):  $\delta$  8.30 (d, *J* = 4.4 Hz, 1H), 7.97 (d, *J* = 7.6 Hz, 1H), 7.63 (d, *J* = 7.6 Hz, 2H), 7.47-7.41 (m, 3H), 7.38-7.28 (m, 5H), 7.10-7.06 (m, 1H), 6.63 (d, *J* = 3.6 Hz, 1H), 3.02 (t, *J* = 7.2 Hz, 2H), 2.87 (t, *J* = 8.0 Hz, 2H) ppm; <sup>13</sup>C NMR (100 MHz, CDCl<sub>3</sub>):  $\delta$  198.8, 148.4, 143.6, 139.1, 136.8, 136.2, 132.7, 130.2, 129.3, 128.9, 128.8, 128.8, 128.3, 127.7, 127.2, 120.3, 116.2, 101.0, 39.2, 26.3 ppm. ESI HRMS: calcd. for C<sub>22</sub>H<sub>18</sub>N<sub>2</sub>O+H 327.1497, found 327.1482.

(*R*)-4-(2-(1*H*-pyrrolo[2,3-*b*]pyridin-1-yl)phenyl)pentan-2-one (**4s**). Light yellow oil, 28 h, 84%

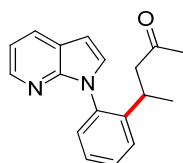

**4s**

yield; <sup>1</sup>H NMR (400 MHz, CDCl<sub>3</sub>):  $\delta$  8.27 (d, *J* = 4.0 Hz, 1H), 7.97 (d, *J* = 7.6 Hz, 1H), 7.46-7.41 (m, 3H), 7.34-7.29 (m, 2H), 7.09-7.06 (m, 1H), 6.64 (d, *J* = 3.2 Hz, 1H), 2.97-2.82 (m, 2H), 2.49-2.45 (m, 1H), 1.88-1.73 (m, 3H), 1.13 (d, *J* = 6.8 Hz, 3H) ppm; <sup>13</sup>C NMR (100 MHz, DMSO):  $\delta$  207.3, 148.9, 144.8, 143.4, 136.3, 131.0, 129.3, 129.3, 127.3, 127.1, 120.3, 116.7, 101.0, 50.8, 30.1, 29.3, 21.9 ppm. ESI HRMS: calcd. for C<sub>18</sub>H<sub>18</sub>N<sub>2</sub>O+H 279.1497, found

279.1530.

(*R*)-3-(2-(1*H*-pyrrolo[2,3-*b*]pyridin-1-yl)phenyl)cyclopentanone (**4t**). Light yellow oil, 21 h, 86%

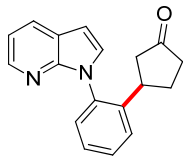

**4t**

yield; <sup>1</sup>H NMR (400 MHz, DMSO):  $\delta$  8.20 (d, *J* = 4.4 Hz, 1H), 8.07 (d, *J* = 8.0 Hz, 1H), 7.67-7.64 (m, 2H), 7.53 (t, *J* = 7.6 Hz, 1H), 7.41 (t, *J* = 7.6 Hz, 1H), 7.30 (d, *J* = 7.6 Hz, 1H), 7.17-7.14 (m, 1H), 6.71 (d, *J* = 3.2 Hz, 1H), 3.10-3.02 (m, 1H), 2.29-2.12 (m, 3H), 2.02-1.92 (m, 3H) ppm; <sup>13</sup>C NMR (100 MHz, DMSO):  $\delta$  217.6, 148.8, 143.6, 141.9, 137.2, 130.8, 129.4, 129.3, 129.3, 127.5,

127.4, 120.3, 116.8, 101.4, 45.8, 38.5, 37.1, 30.6 ppm. ESI HRMS: calcd. for C<sub>18</sub>H<sub>16</sub>N<sub>2</sub>O+H 277.1341, found 277.1334.

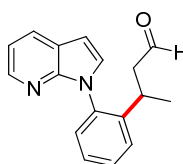

**4u**

(*R*)-3-(2-(1*H*-pyrrolo[2,3-*b*]pyridin-1-yl)phenyl)butanal (**4u**). Brown oil, 48 h, 66% yield; <sup>1</sup>H NMR (400 MHz, CDCl<sub>3</sub>):  $\delta$  9.44 (s, 1H), 8.28 (s, 1H), 7.99 (d, *J* = 8.0 Hz, 1H), 7.49-7.42 (m, 2H), 7.37-7.28 (m, 3H), 7.12-7.09 (m, 1H), 6.66 (d, *J* = 3.2 Hz, 1H), 3.09-3.04 (m, 1H), 2.82-2.70 (m, 1H), 2.53-2.47 (m, 1H),



1.19 (d,  $J = 5.2$  Hz, 3H) ppm;  $^{13}\text{C}$  NMR (100 MHz,  $\text{CDCl}_3$ ):  $\delta$  201.7, 148.8, 143.7, 136.1, 129.6, 129.3, 129.1, 129.0, 127.3, 126.9, 120.4, 116.4, 101.1, 51.2, 28.3, 22.1 ppm. ESI HRMS: calcd. for  $\text{C}_{17}\text{H}_{16}\text{N}_2\text{O}+\text{H}$  265.1341, found 265.1334.

(E)-2-methyl-3-phenyl-1-(pyrido[3',2':4,5]pyrrolo[1,2-a]quinolin-6-yl)prop-2-en-1-one (**5**). Yellow solid, 24 h, 90% yield;  $^1\text{H}$  NMR (400 MHz,  $\text{CDCl}_3$ ):  $\delta$  8.61-8.59 (m, 1H),

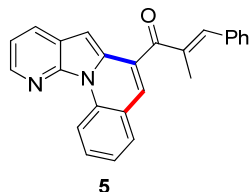

8.16-8.14 (m, 1H), 7.78-7.74 (m, 1H), 7.70-7.68 (m, 1H), 7.52 (s, 1H), 7.46-7.43 (m, 4H), 7.41-7.38 (m, 2H), 7.37-7.34 (m, 3H), 7.06 (s, 1H), 2.37 (s, 3H) ppm;  $^{13}\text{C}$  NMR (150 MHz,  $\text{CDCl}_3$ ):  $\delta$  196.9, 146.0, 142.6, 142.3, 137.1, 136.6, 135.5, 133.2, 131.2, 129.9, 129.4, 129.0, 128.9, 128.9, 128.8, 128.5, 123.7, 122.2, 121.9, 118.3, 118.0, 95.5, 14.0 ppm.

ESI HRMS: calcd. for  $\text{C}_{25}\text{H}_{18}\text{N}_2\text{O}+\text{H}$  363.1497, found 363.1484.

6-methyl-5-phenyl-5H-pyrido[3',2':4,5]pyrrolo[3,2,1-de]acridin-7(6H)-one (**6**). Yellow solid, 24 h, 62% yield;  $^1\text{H}$  NMR (400 MHz,  $\text{CDCl}_3$ ):  $\delta$  10.24 (d,  $J = 8.8$  Hz, 1H), 8.60 (d,  $J = 4.4$  Hz, 1H), 8.21 (d,  $J = 7.6$  Hz, 1H), 7.72 (t,  $J = 8.0$  Hz, 1H), 7.56 (d,  $J = 7.6$  Hz, 1H), 7.50 (s, 1H), 7.39-7.36 (m, 1H), 7.26-7.17 (m, 5H), 5.01 (d,  $J = 7.2$  Hz, 1H), 3.21 (q,  $J = 7.6$  Hz, 1H), 0.91 (d,  $J = 7.6$  Hz, 3H) ppm;  $^{13}\text{C}$  NMR

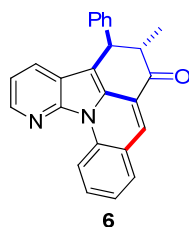

(100 MHz,  $\text{CDCl}_3$ ):  $\delta$  205.9, 157.0, 146.2, 142.3, 139.2, 138.6, 132.5, 129.4, 129.1, 128.7, 127.3, 127.0, 126.8, 123.5, 122.8, 120.0, 119.0, 118.1, 94.7, 48.7, 47.4, 12.0 ppm. ESI HRMS: calcd. for  $\text{C}_{25}\text{H}_{18}\text{N}_2\text{O}+\text{H}$  363.1497, found 363.1477.

2-methyl-3-phenyl-2,3-dihydro-1H-cyclopenta[c]pyrido[3',2':4,5]pyrrolo[1,2-a]quinolin-1-one (**7**).

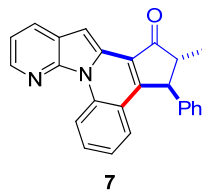

Yellow solid, 24 h, 30% yield;  $^1\text{H}$  NMR (400 MHz,  $\text{CDCl}_3$ ):  $\delta$  10.27 (d,  $J = 8.8$  Hz, 1H), 8.60-8.59 (m, 1H), 8.23-8.21 (m, 1H), 7.76-7.72 (m, 1H), 7.52 (s, 1H), 7.47-7.45 (m, 1H), 7.40-7.36 (m, 1H), 7.35-7.31 (m, 2H), 7.29-7.27 (m, 1H), 7.23-7.21 (m, 2H), 7.19-7.15 (m, 1H), 4.34 (d,  $J = 2.8$  Hz, 1H), 2.70-2.66 (m, 1H), 1.50 (d,  $J = 7.6$  Hz, 3H) ppm;  $^{13}\text{C}$  NMR (151 MHz,

$\text{CDCl}_3$ ):  $\delta$  205.7, 156.7, 146.0, 142.4, 142.3, 138.6, 132.5, 129.3, 129.1, 127.1, 127.1, 127.1, 123.3, 122.7, 120.0, 118.9, 118.1, 94.6, 53.6, 53.3, 15.8 ppm. ESI HRMS: calcd. for  $\text{C}_{25}\text{H}_{18}\text{N}_2\text{O}+\text{H}$  363.1497, found 363.1477.

[1] Qian, G.; Hong, X.; Liu, B.; Mao, H.; Xu, B. *Org. Lett.* **2014**, *16*, 5294-5297.

### 3. Mechanism Study

1. Deuterium-labeling experiments were carried out to study the mechanism of the copper-catalyzed annulation process. **4a** and  $\text{Cu}(\text{OAc})_2$  (3 equiv.) were stirred in toluene at  $130^\circ\text{C}$  for 40 min, then  $\text{D}_2\text{O}$  was added and stirred for 5 h. The deuterium was obtained from  $^1\text{H}$  NMR. From the results we could draw the conclusion that  $\alpha$ -position of carbonyl group could be activated by  $\text{Cu}(\text{OAc})_2$  in this reaction system. No reaction occurred when we added TEMPO to the reaction, which implies that the annulation from **4a** to **3a** involves copper-catalyzed radical process.

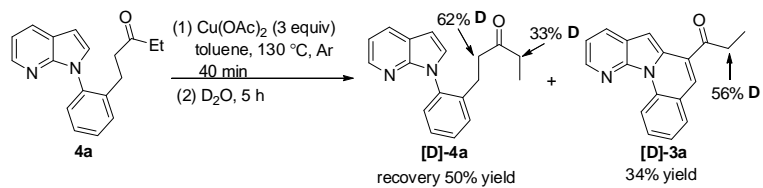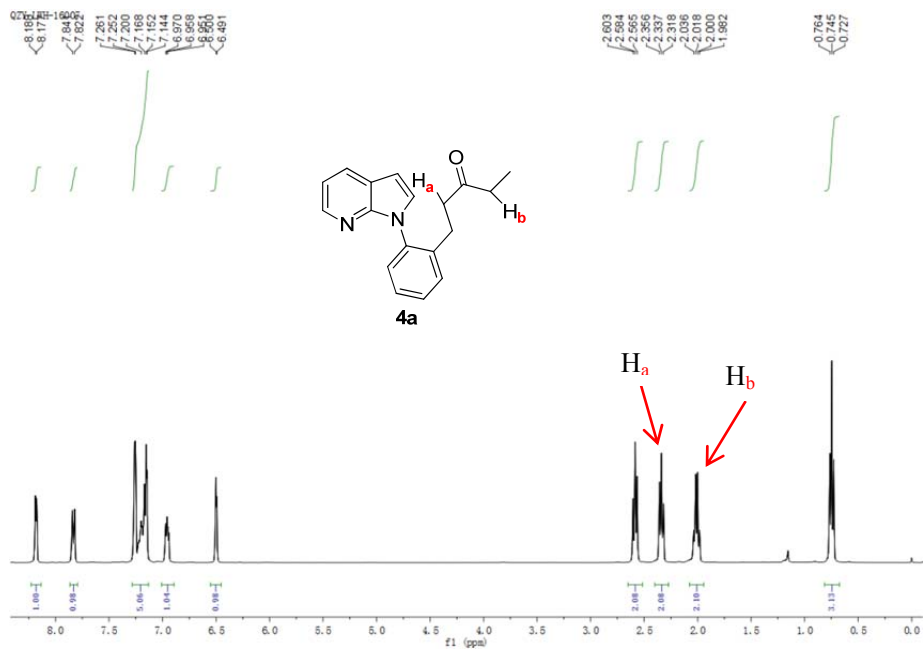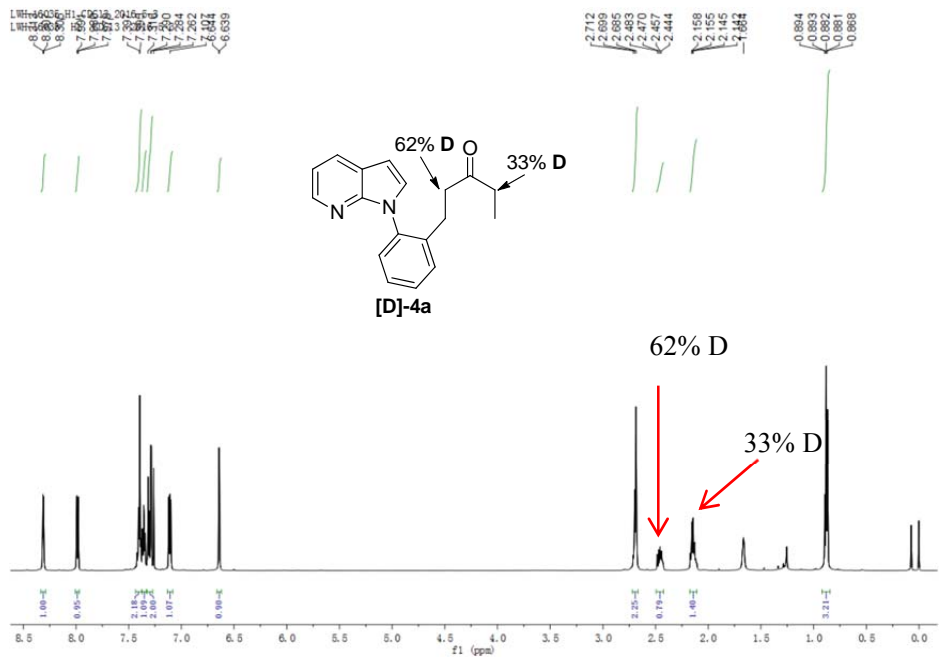

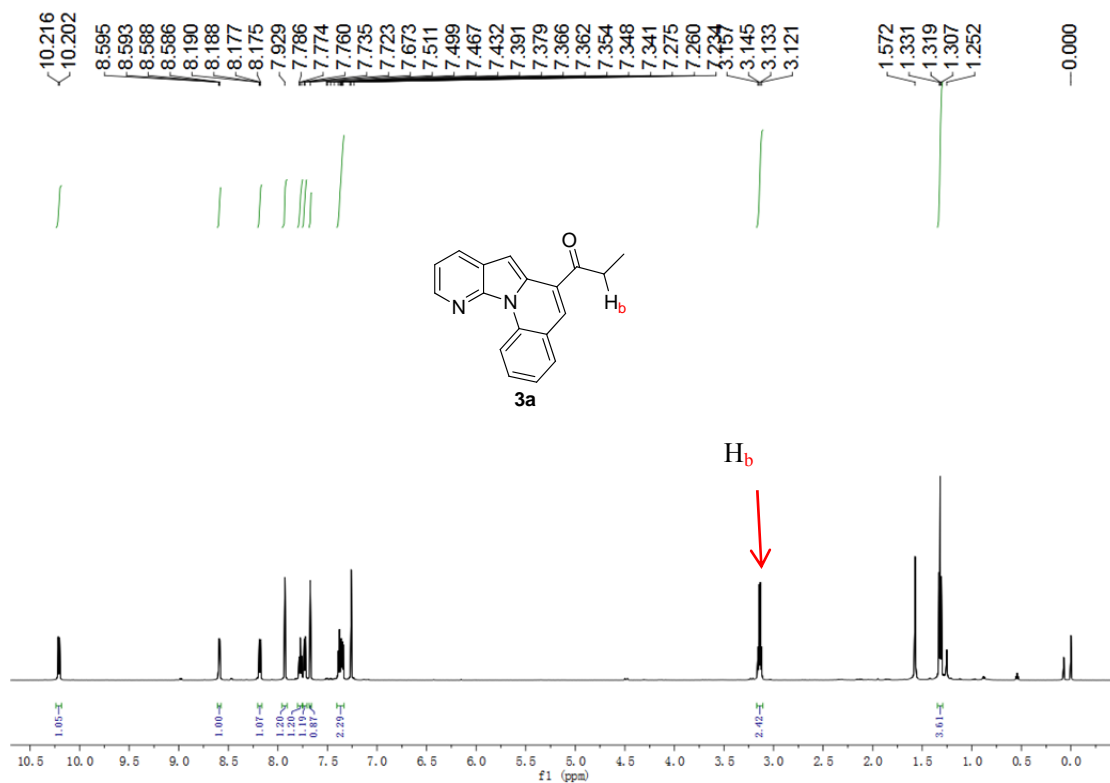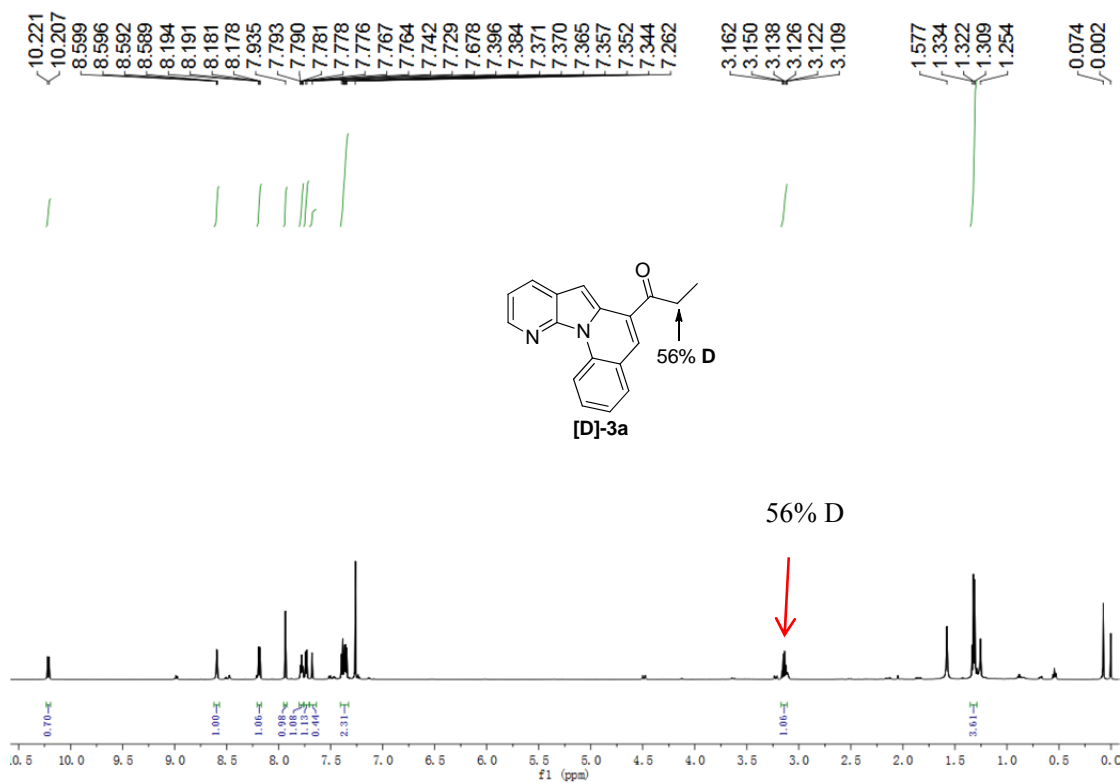

2. Deuterium-labeling experiments were carried out to study the mechanism of this coupling reaction. **1a** was stirred in the absence of  $\alpha,\beta$ -unsaturated ketones for 3 h under standard conditions, then  $D_2O$  was added and stirred for 6 h. The deuterium rate was obtained from  $^1H$  NMR.

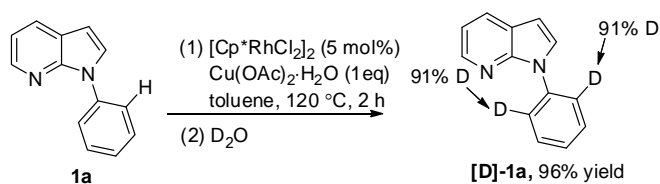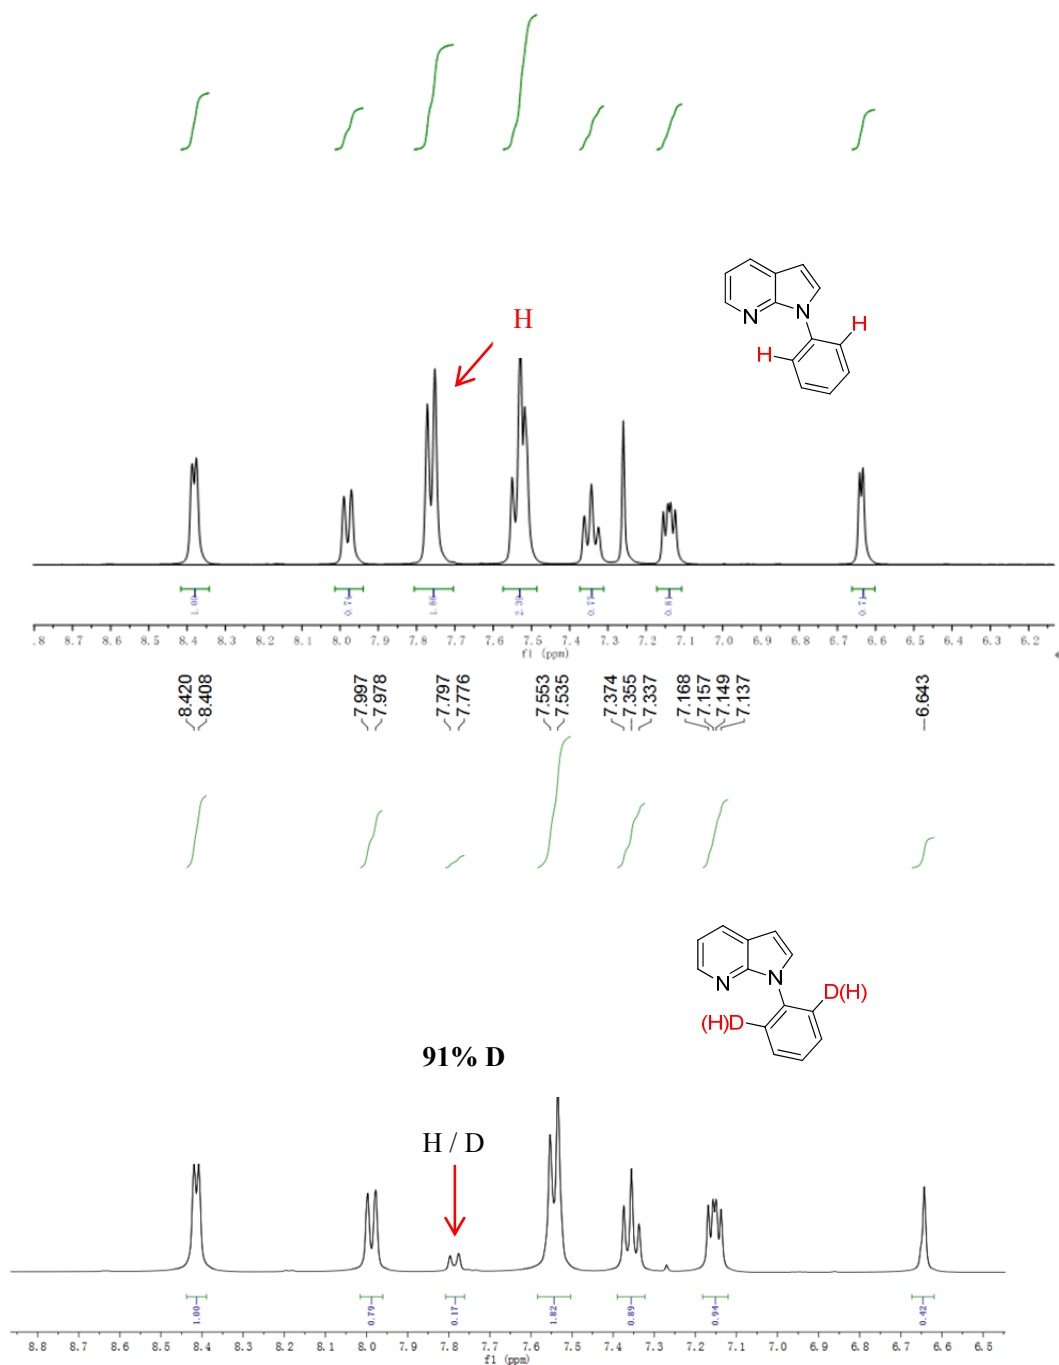

3. The deuterium kinetic isotopic effect was determined to be 1, thus indicates that the cleavage

of ortho C–H bond might be reversible and not involved in the rate-determining step.

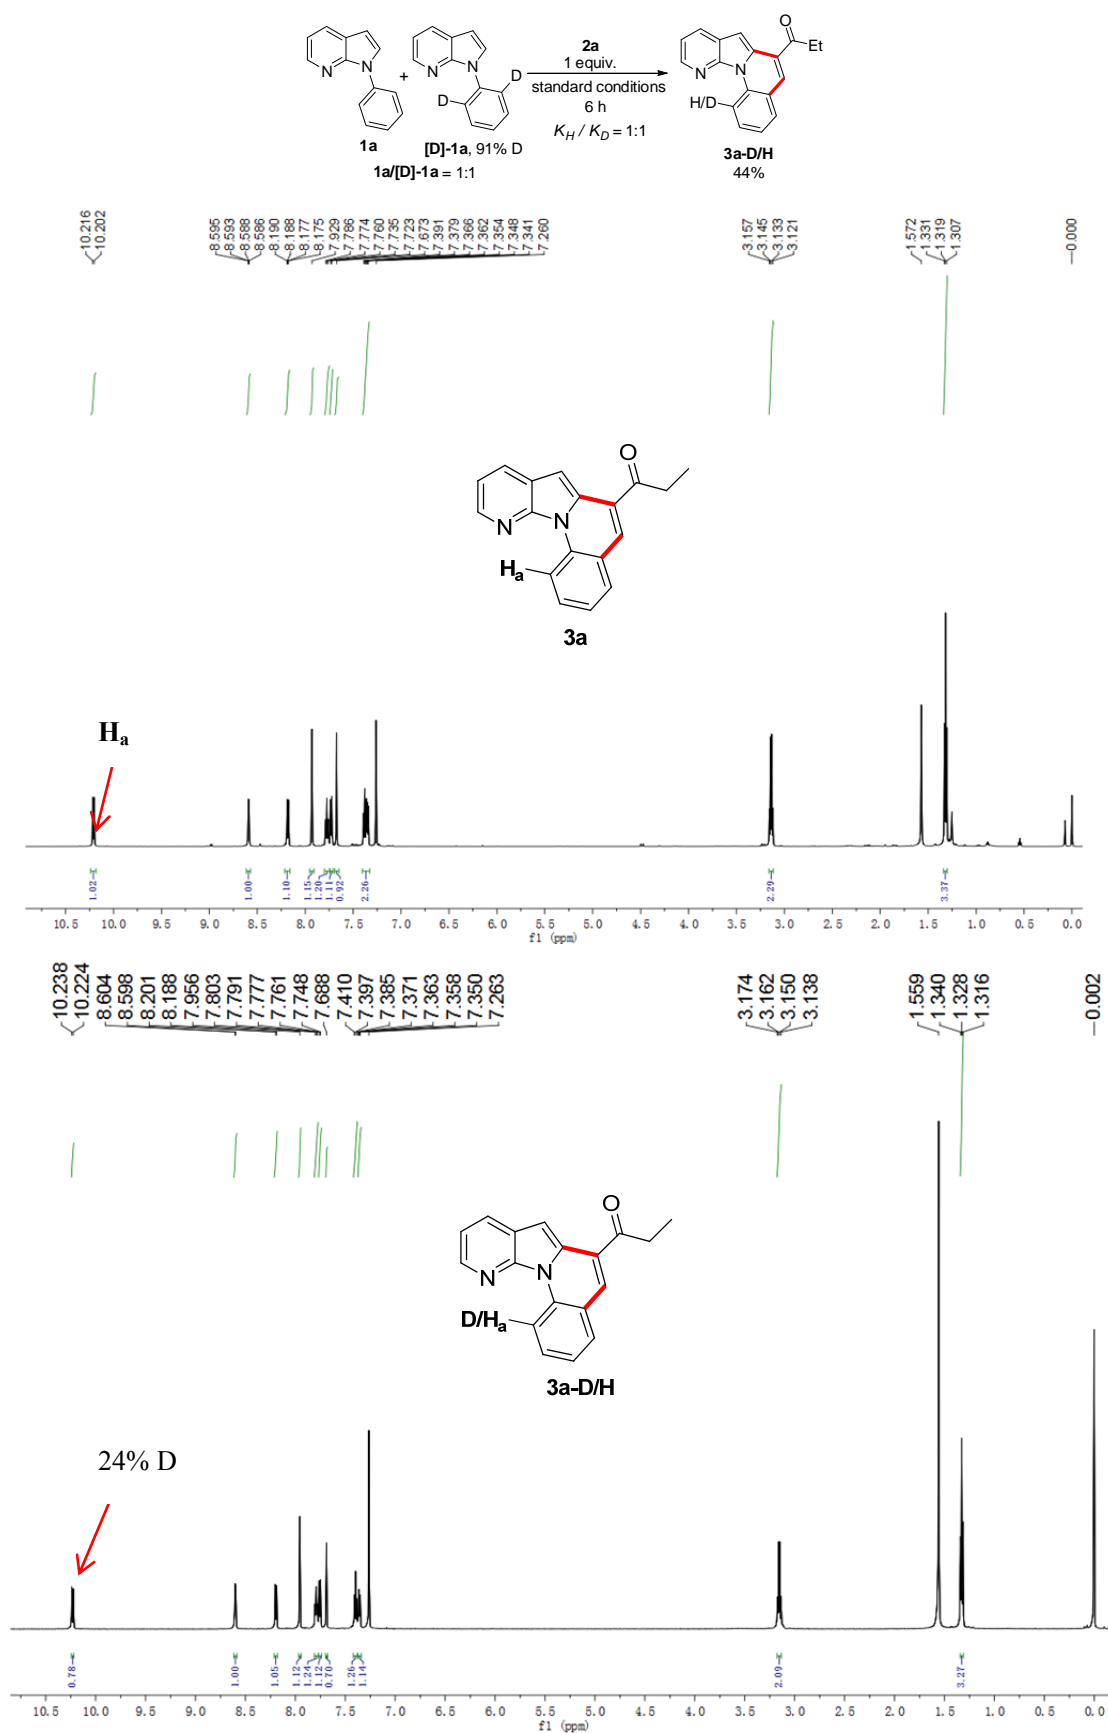

#### 4. NMR Spectra of Alkylated Products and Aza-Fused 7-Azaindole Derivatives and Structure Determination

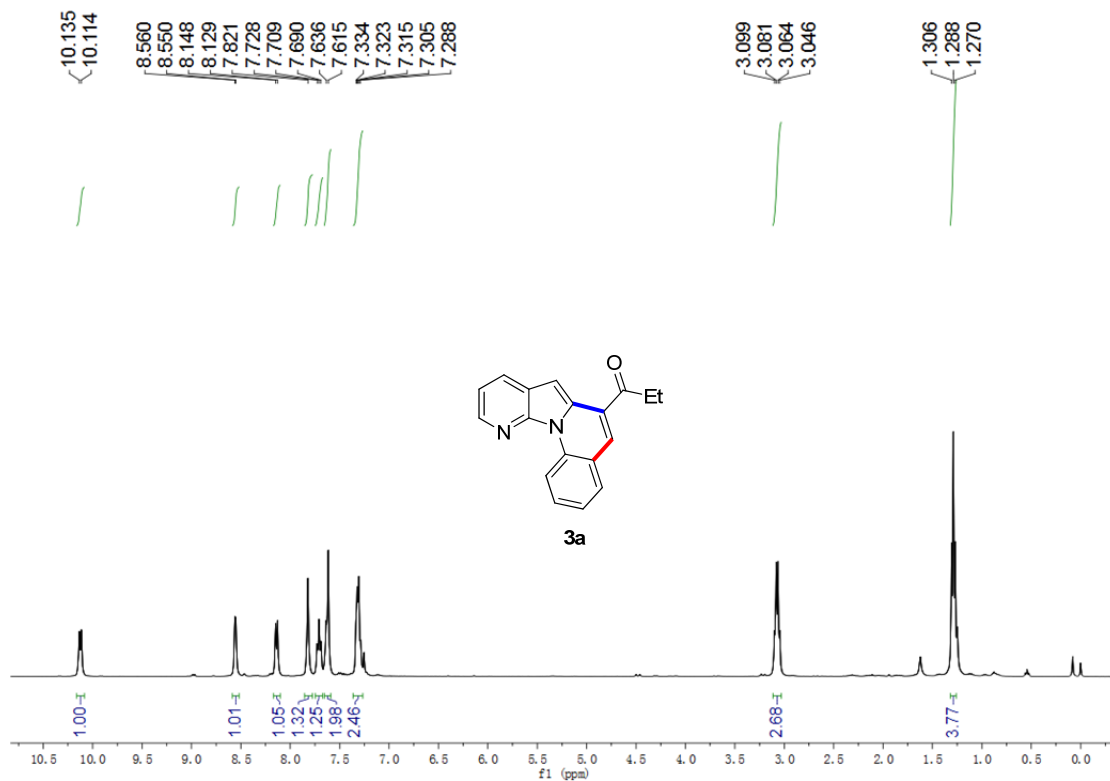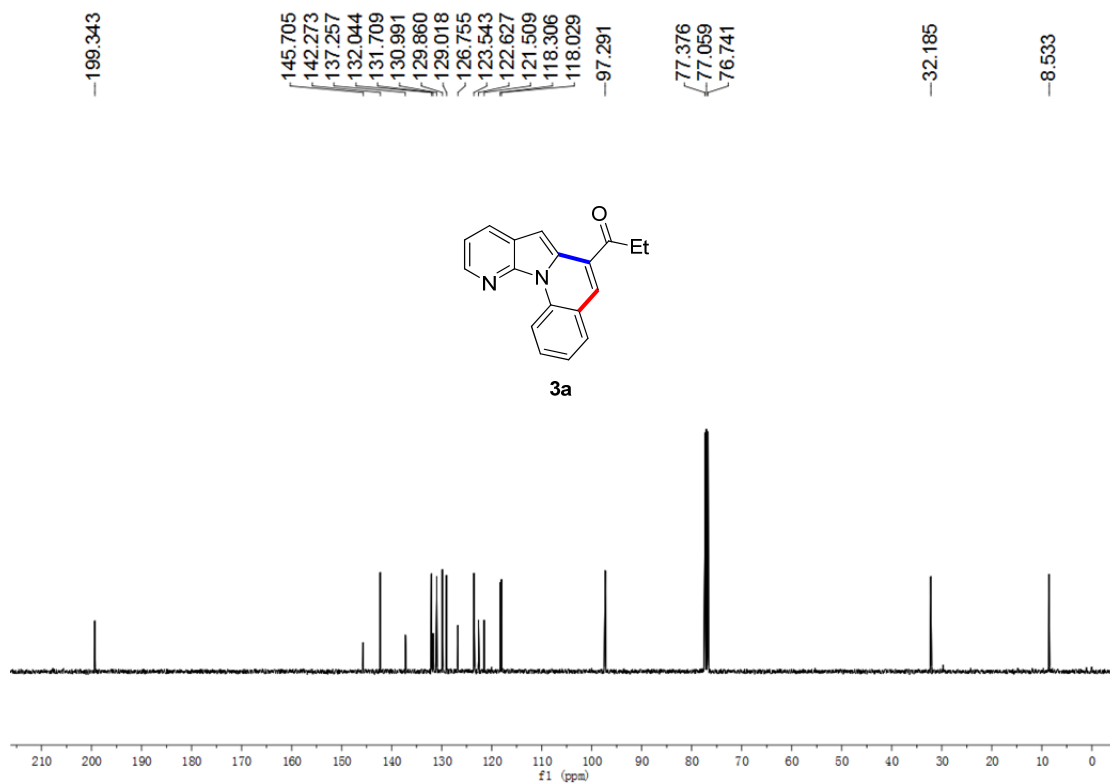

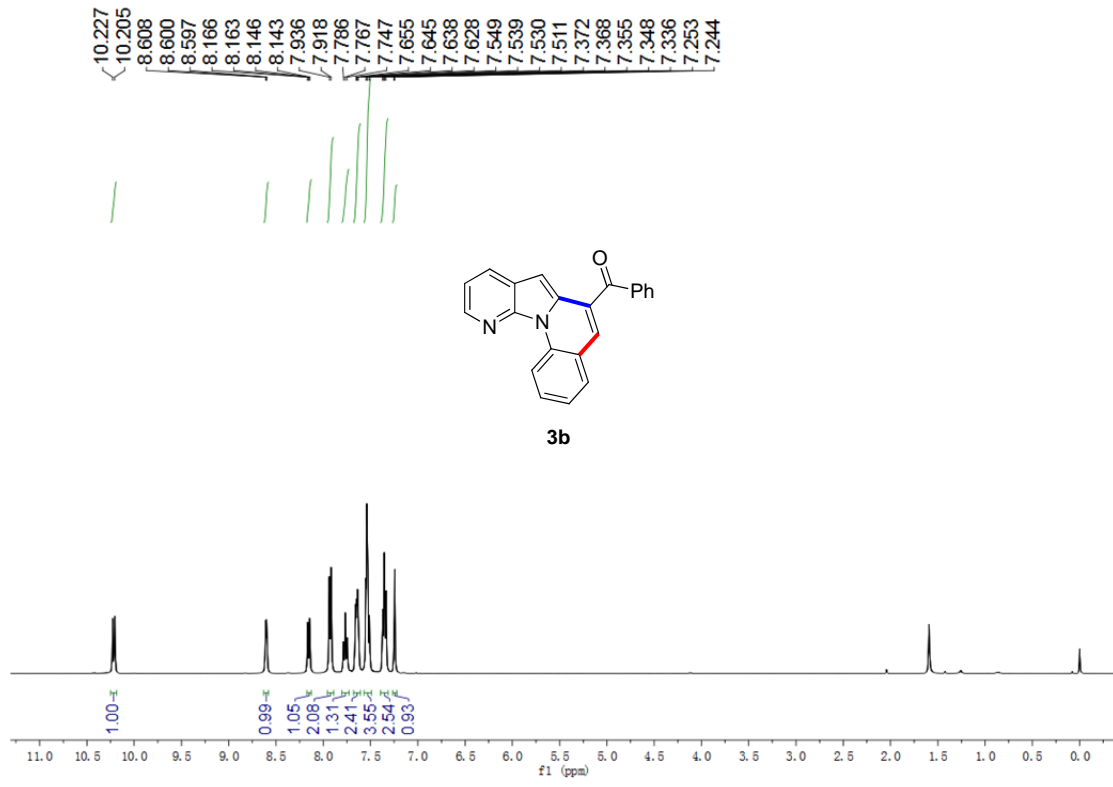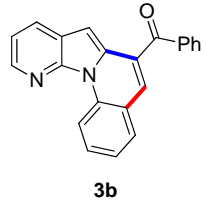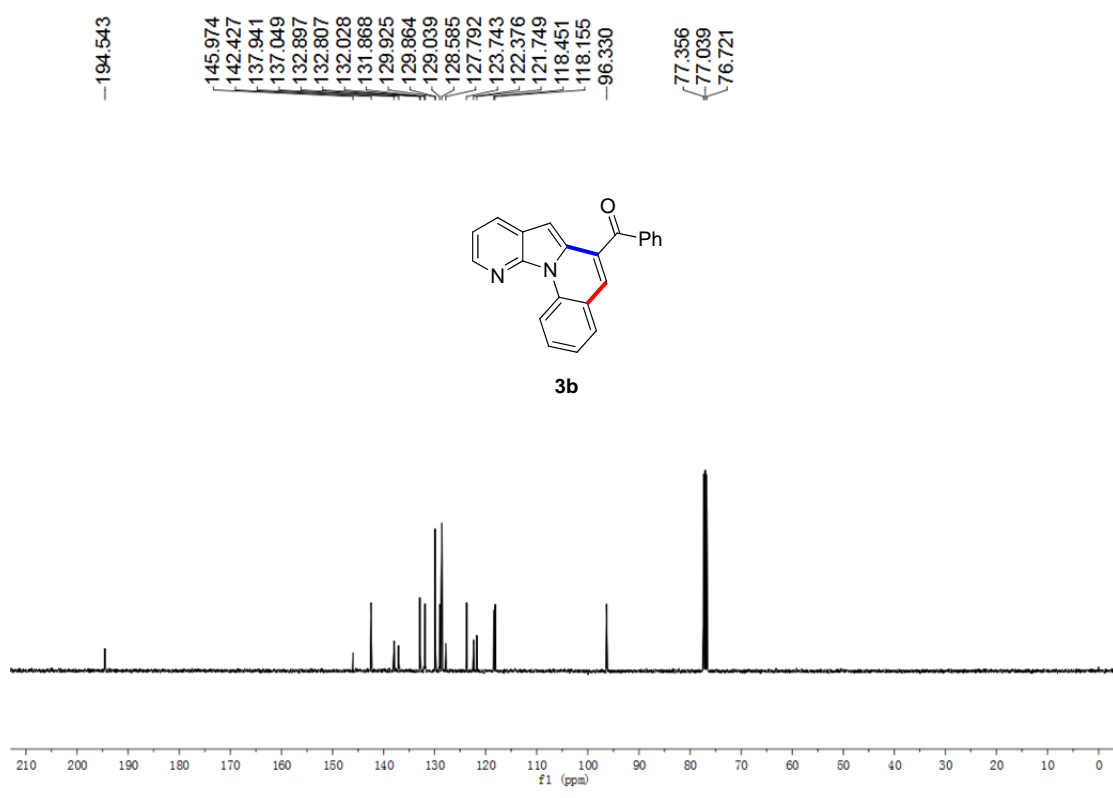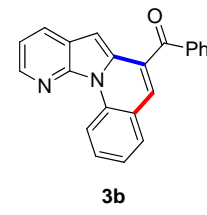

10.236  
10.215  
8.621  
8.612  
8.176  
8.156  
7.808  
7.788  
7.772  
7.688  
7.668  
7.654  
7.519  
7.397  
7.380  
7.363  
7.354  
7.259  
7.217

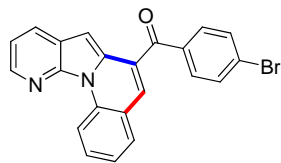

3c

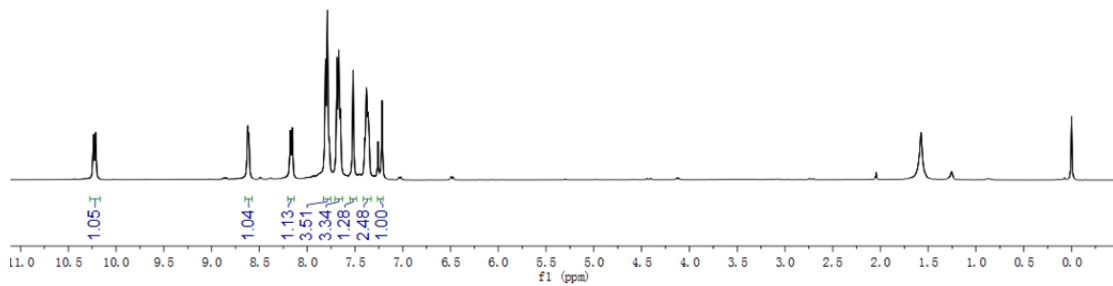

193.422  
145.960  
142.571  
137.098  
136.653  
132.533  
132.089  
132.051  
131.926  
131.389  
129.919  
129.095  
128.030  
127.460  
123.839  
122.314  
121.614  
118.499  
118.236  
96.385  
77.345  
77.028  
76.710

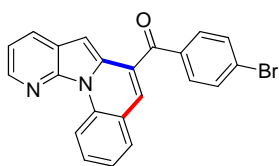

3c

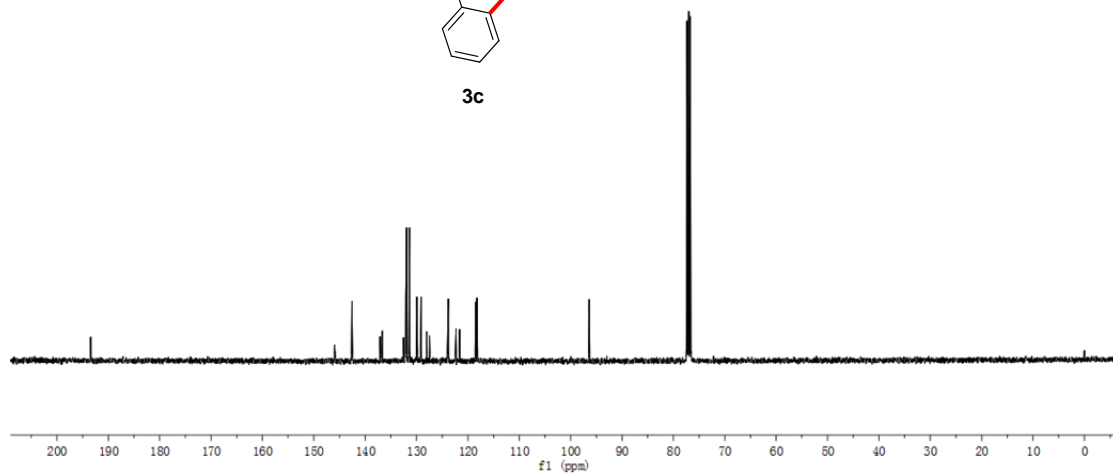



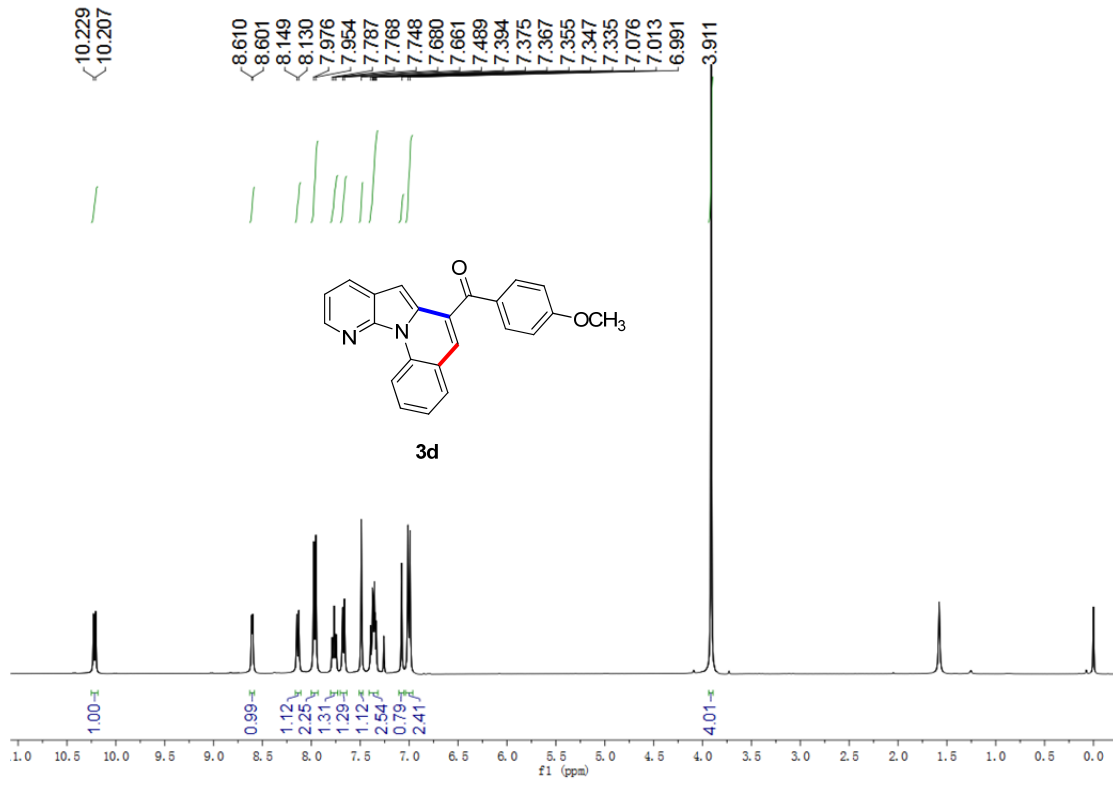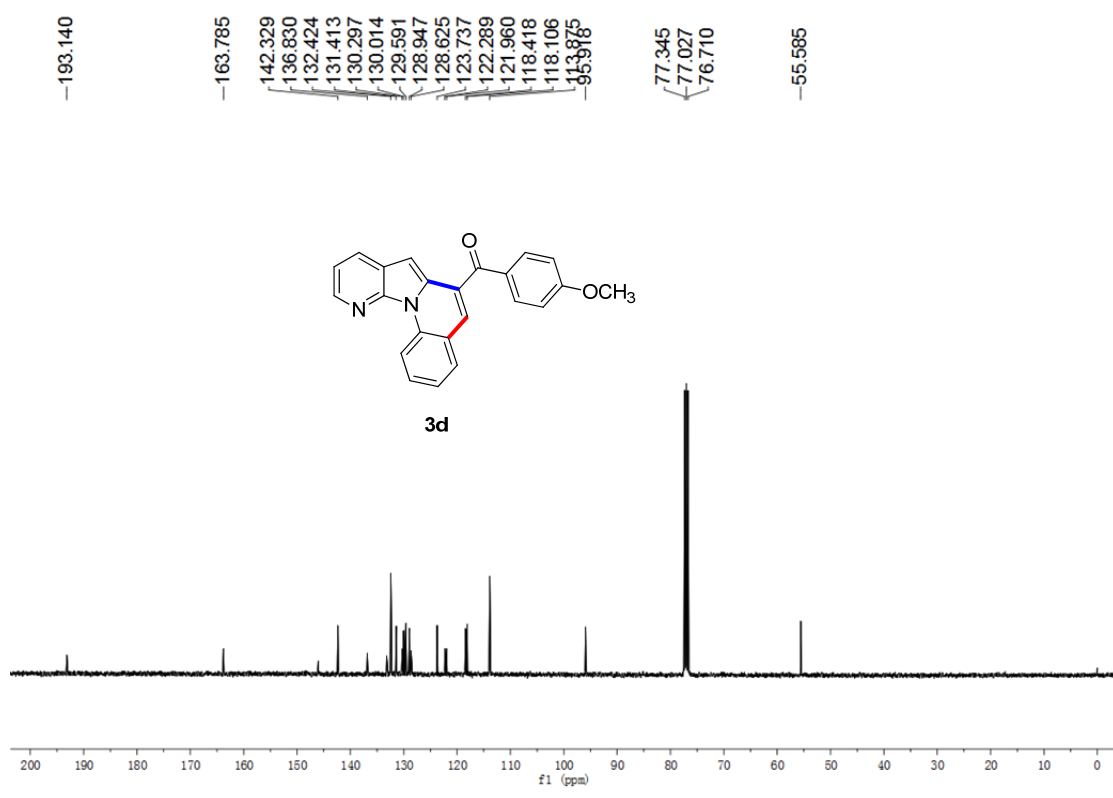

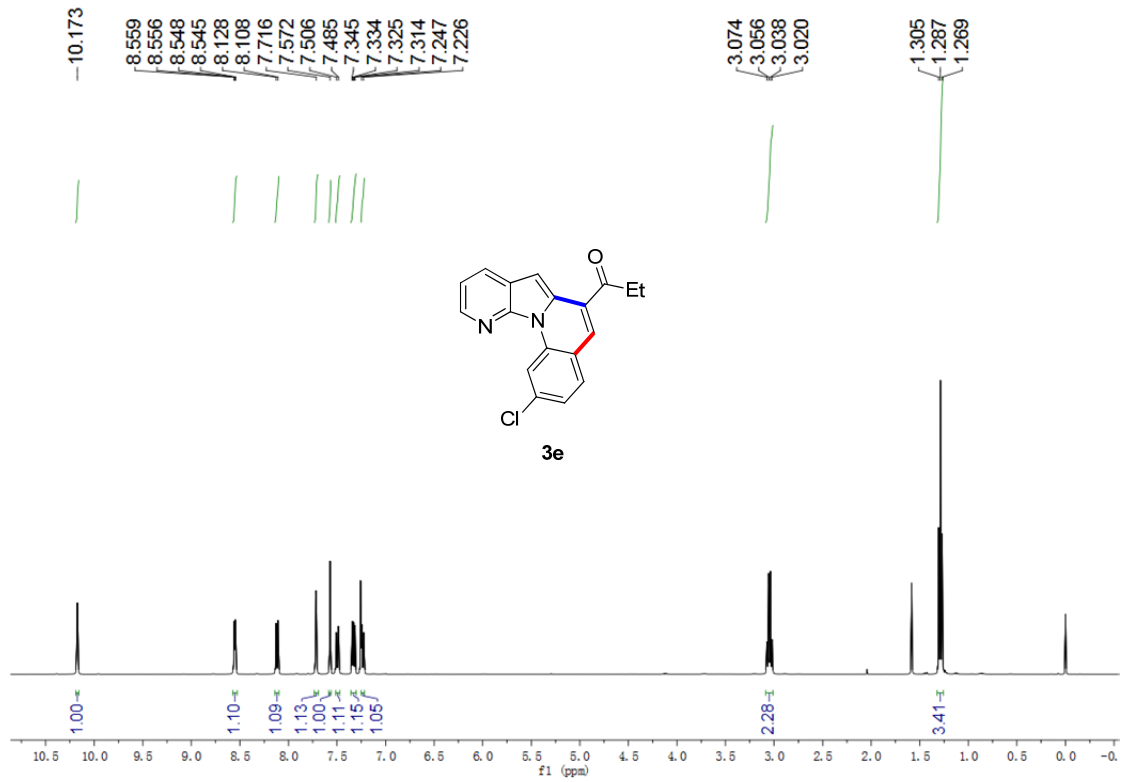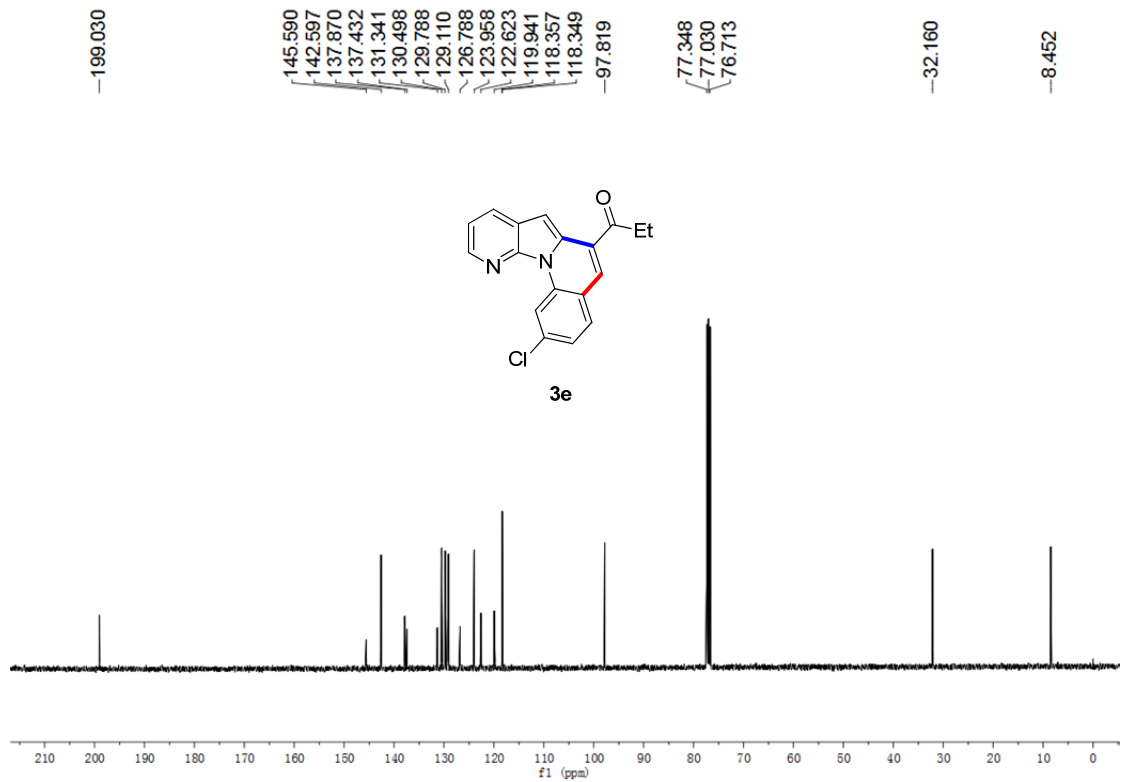

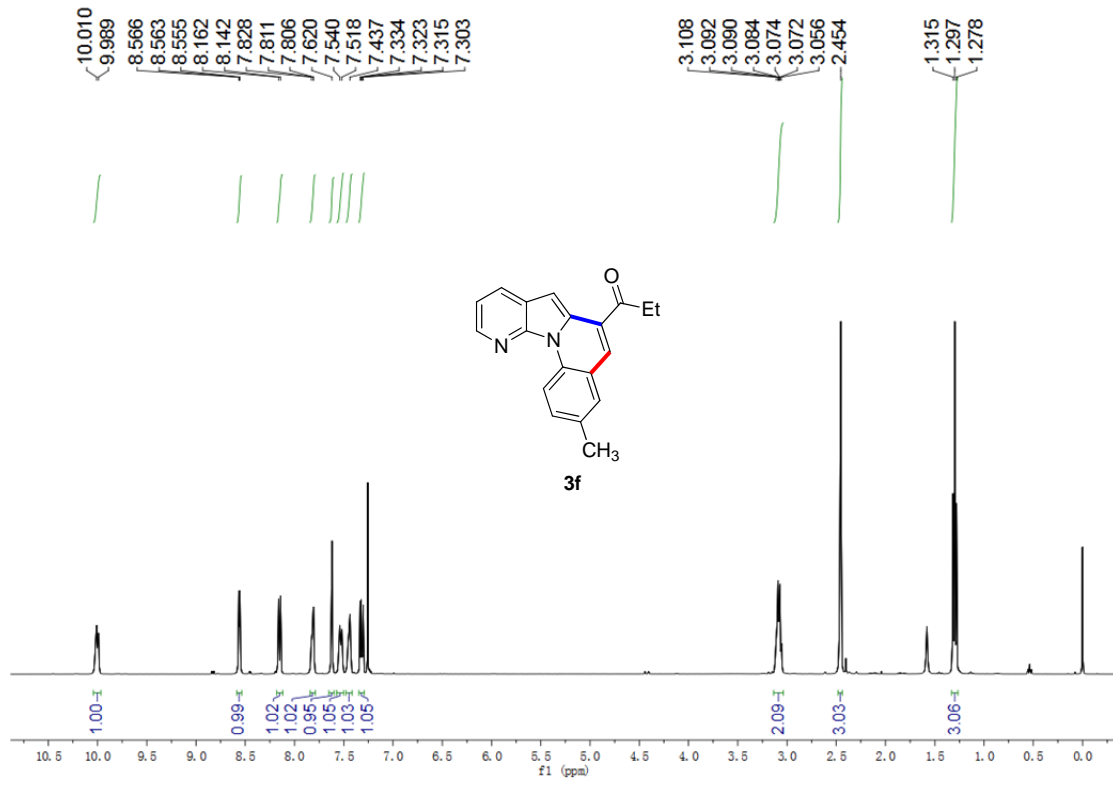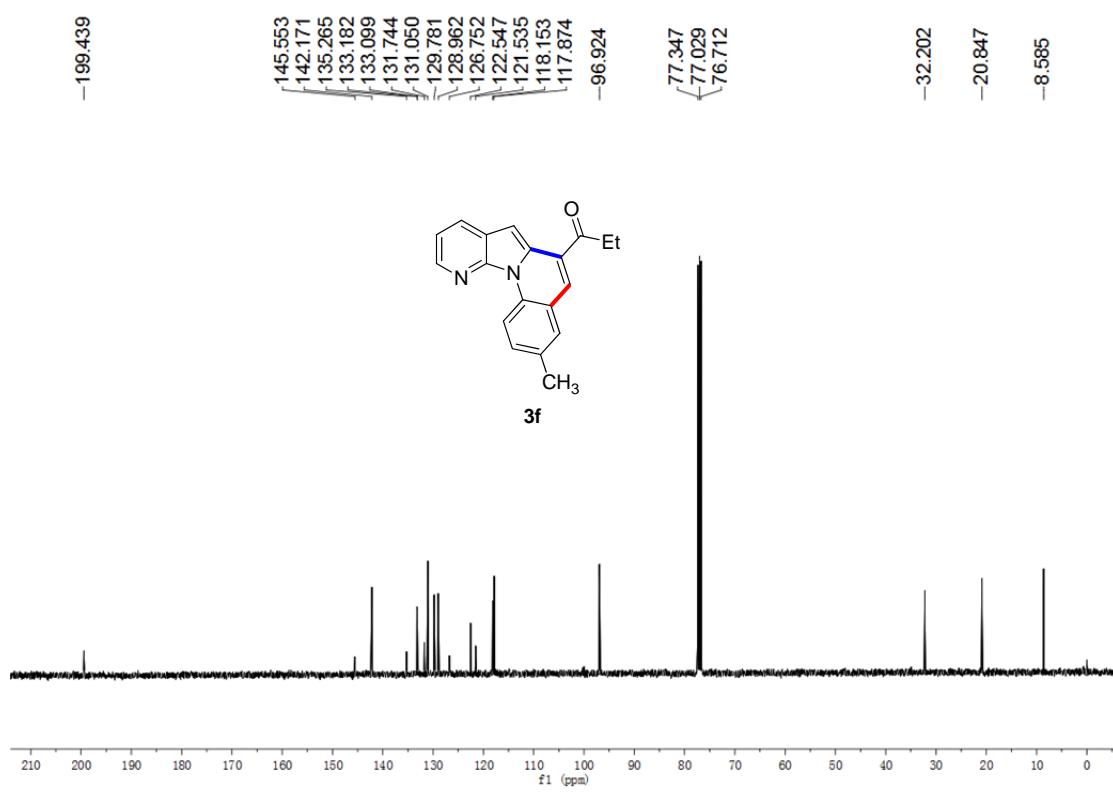

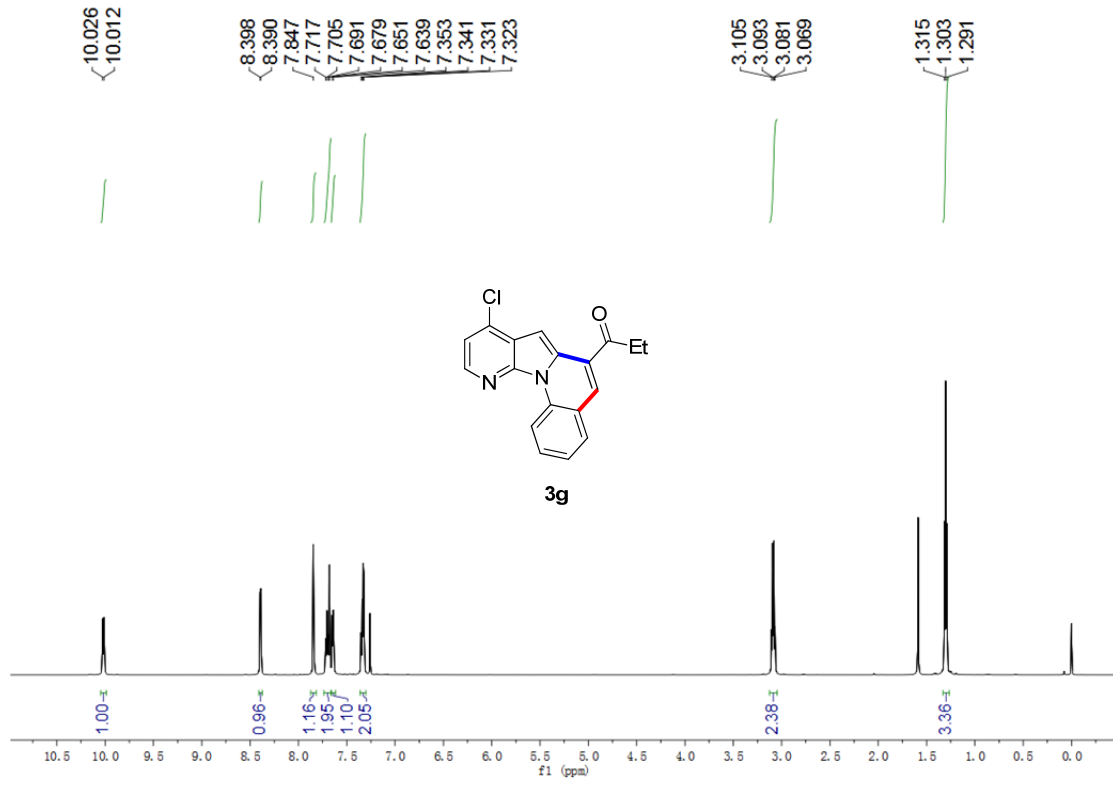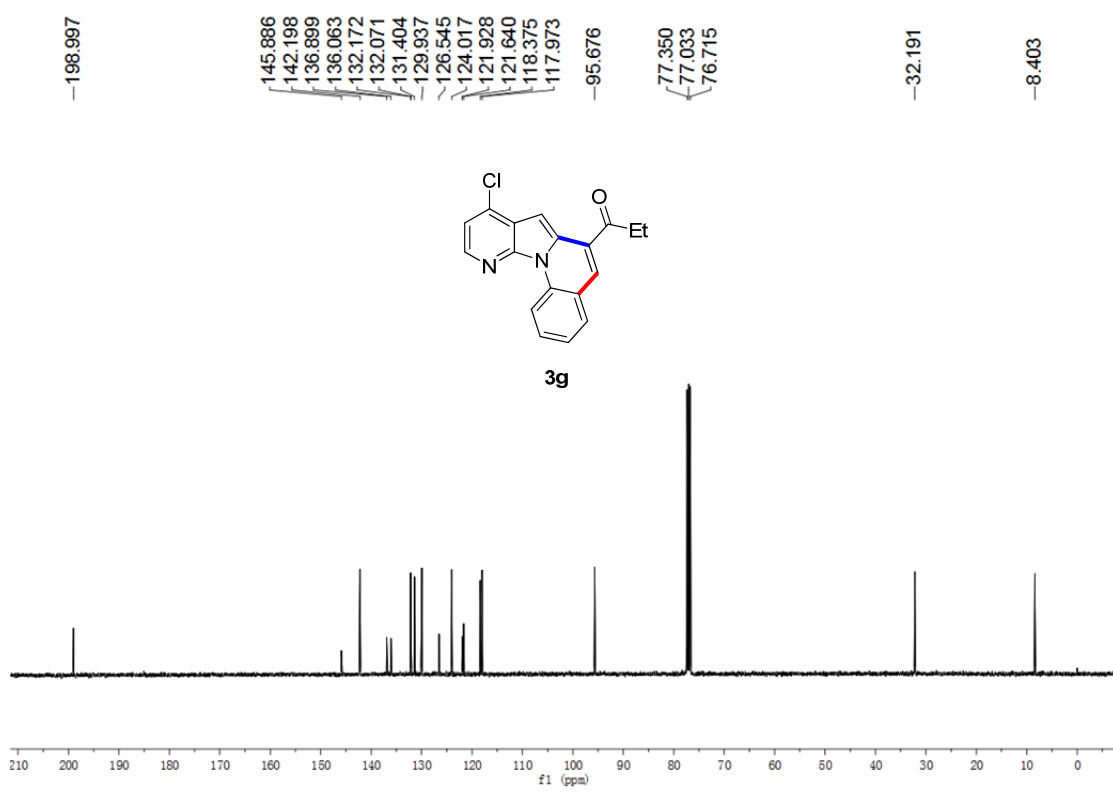

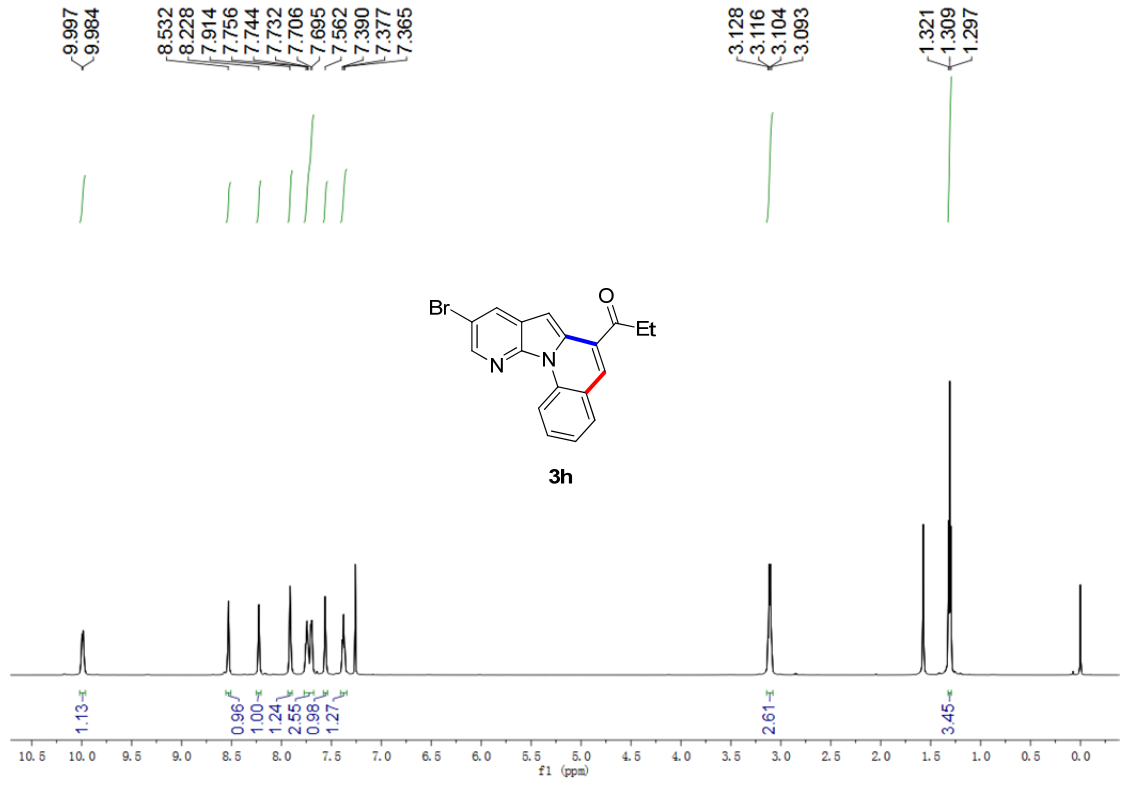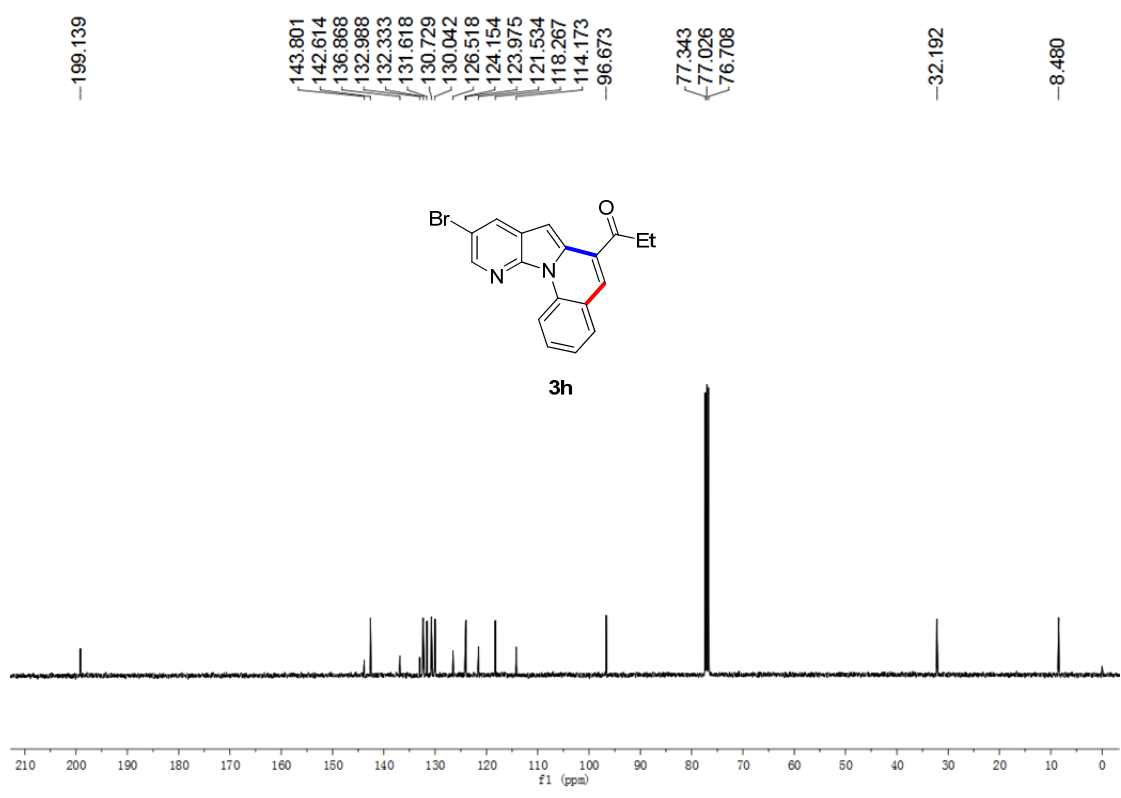

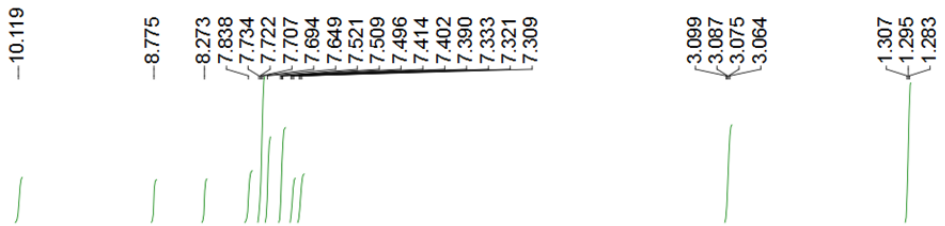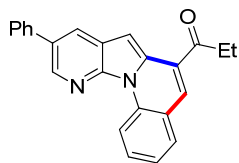

3i

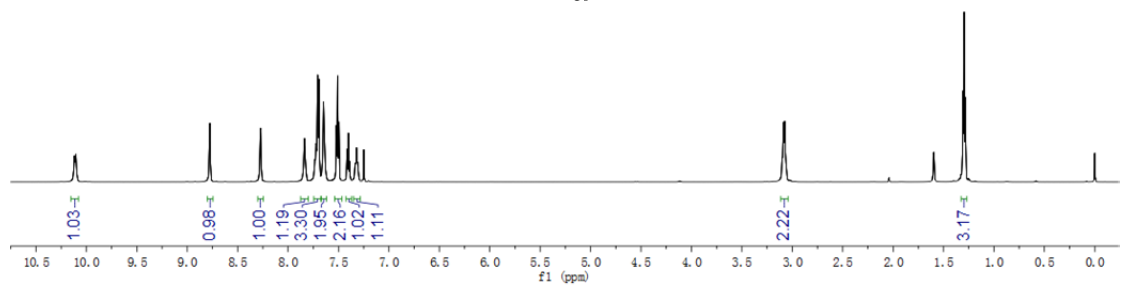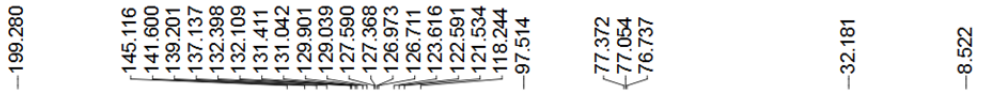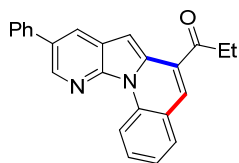

3i

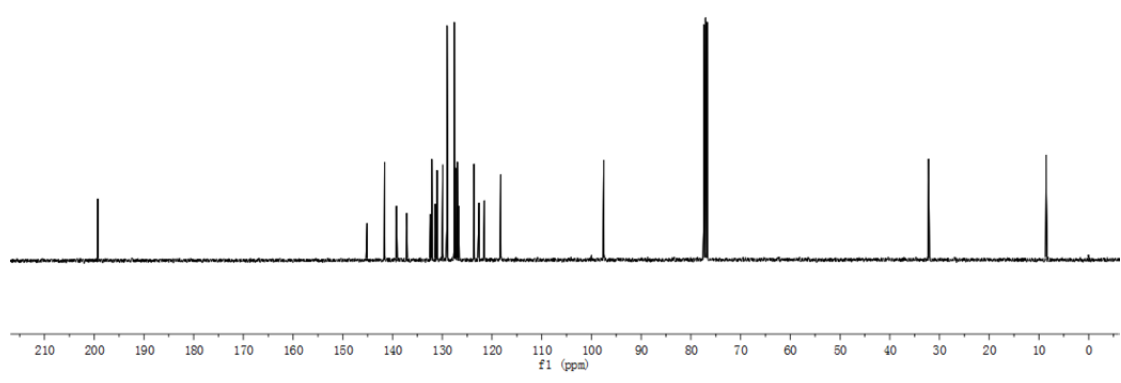

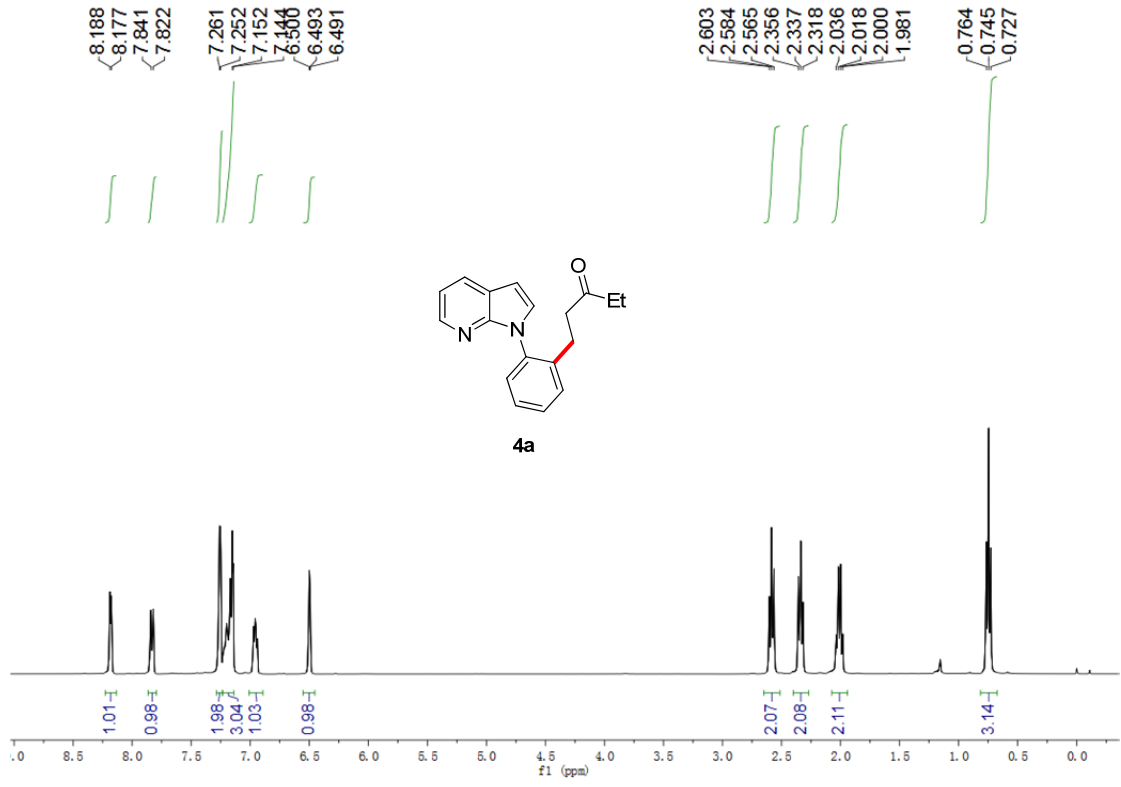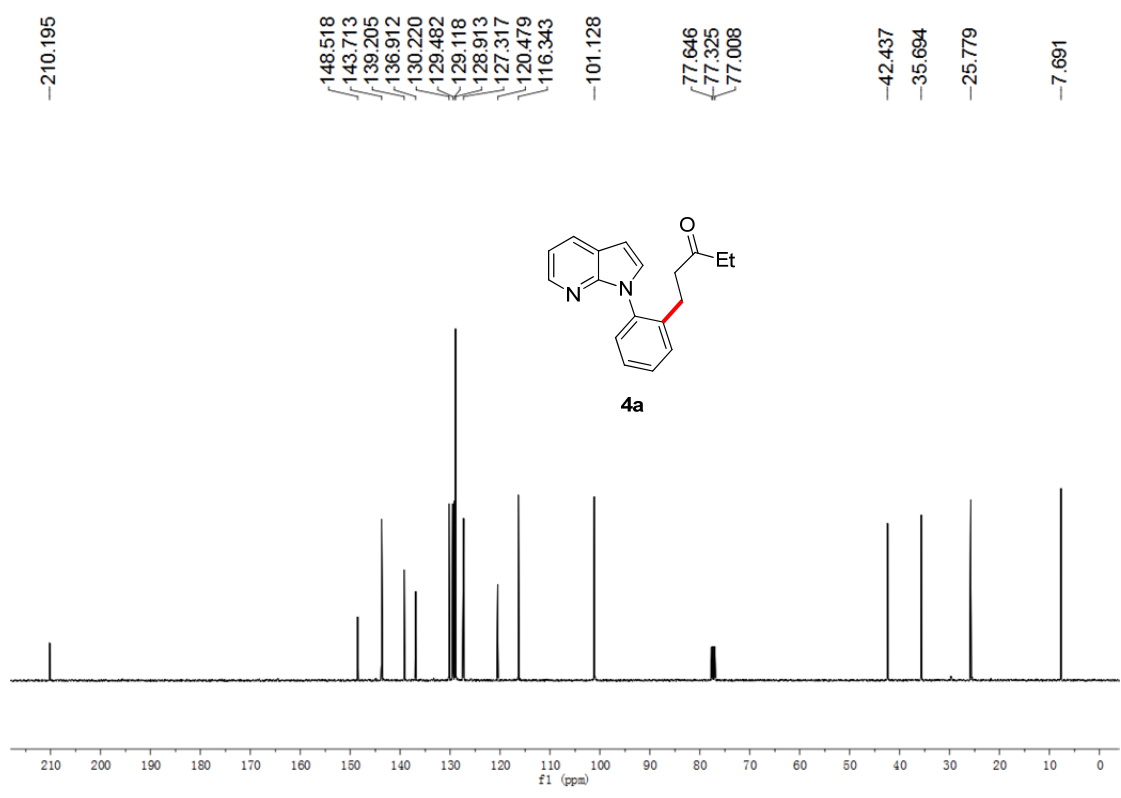

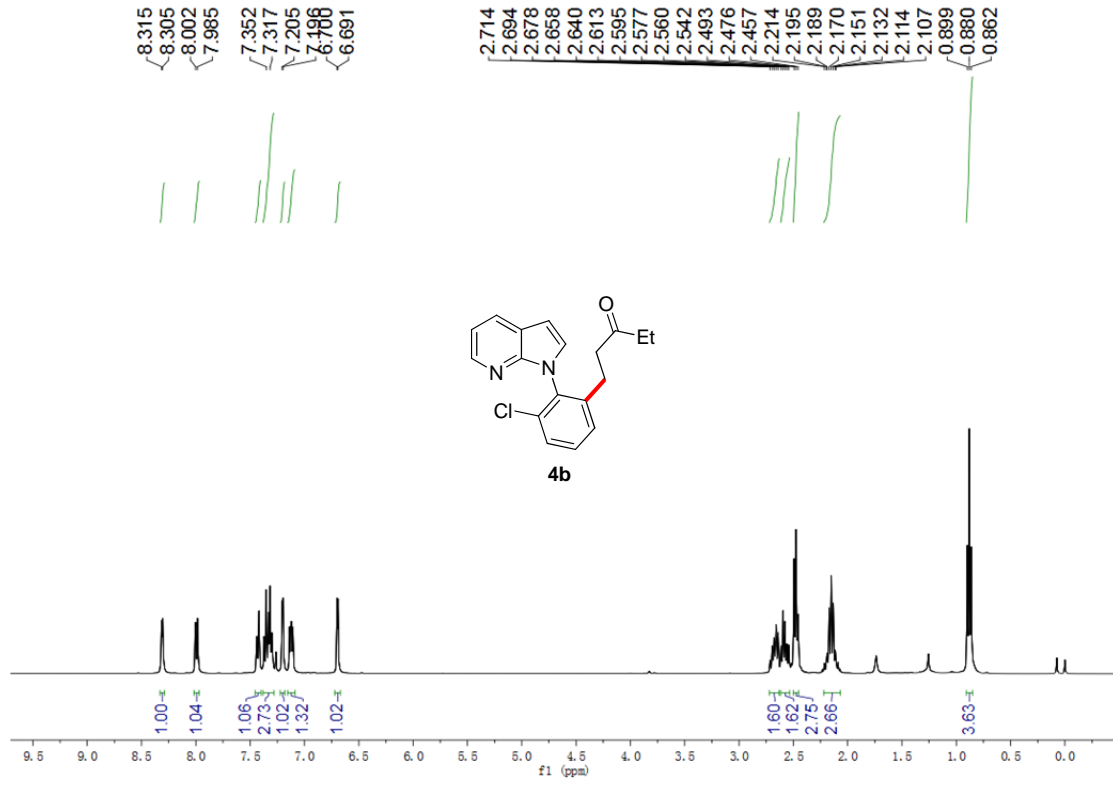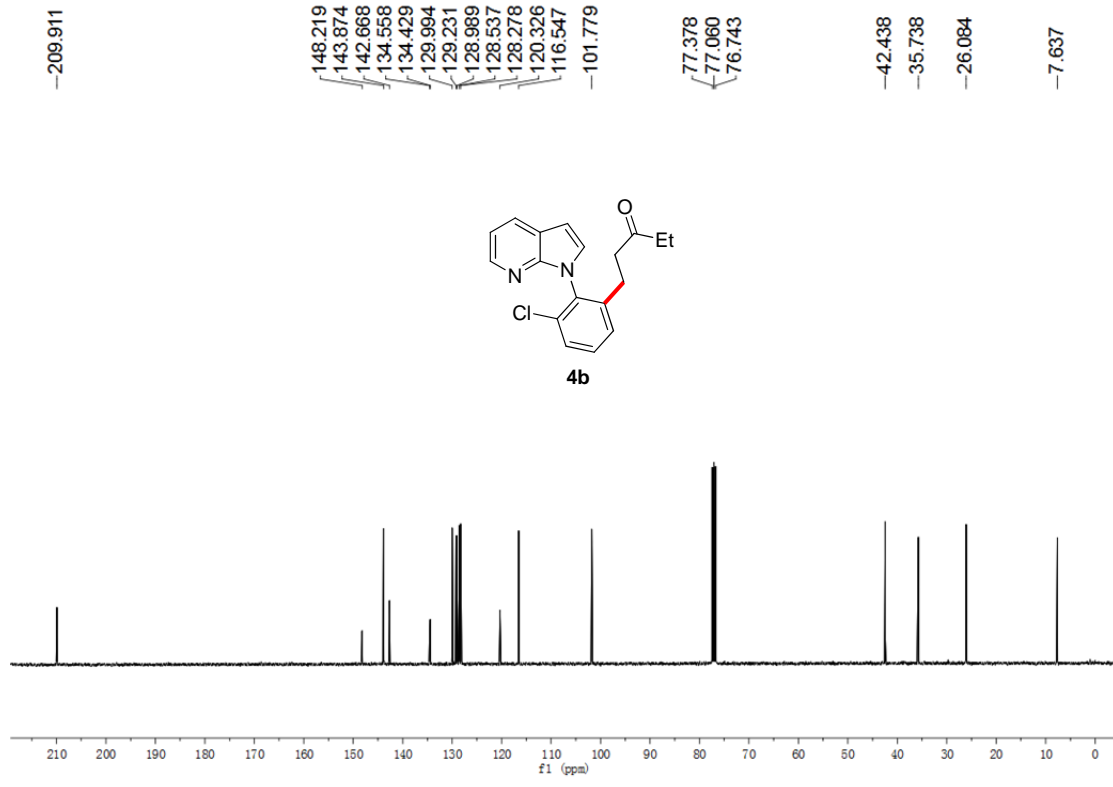



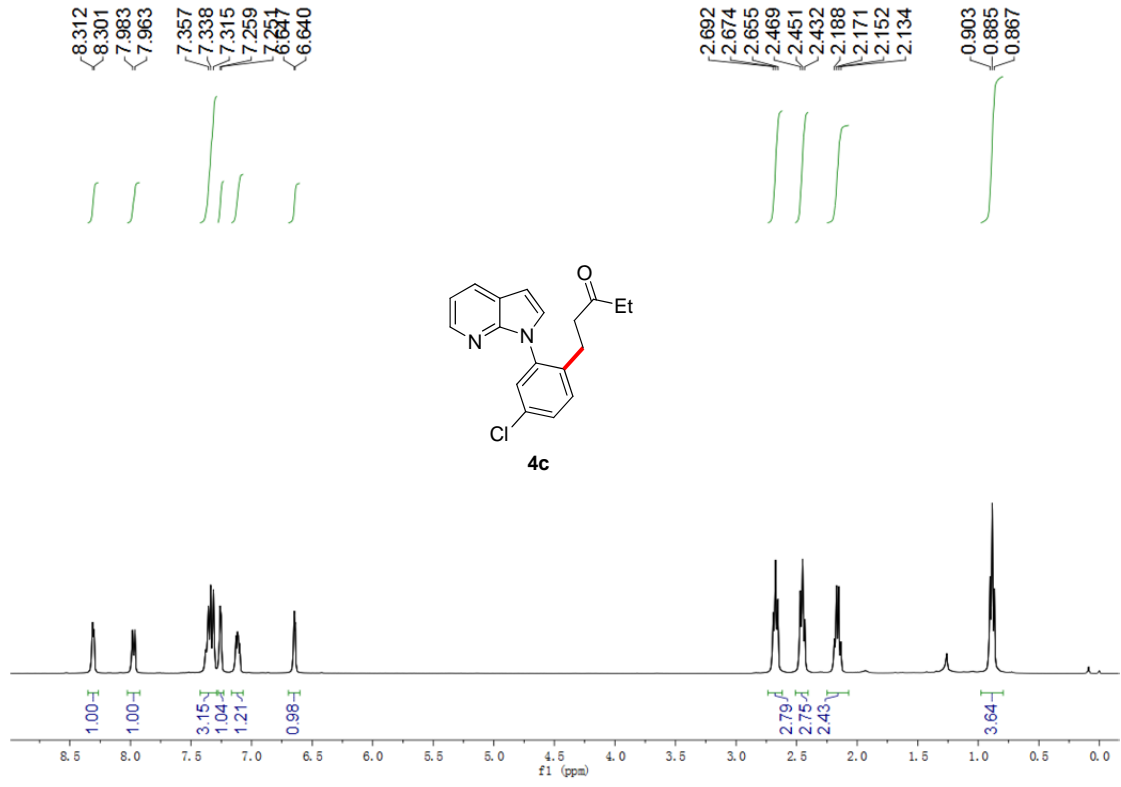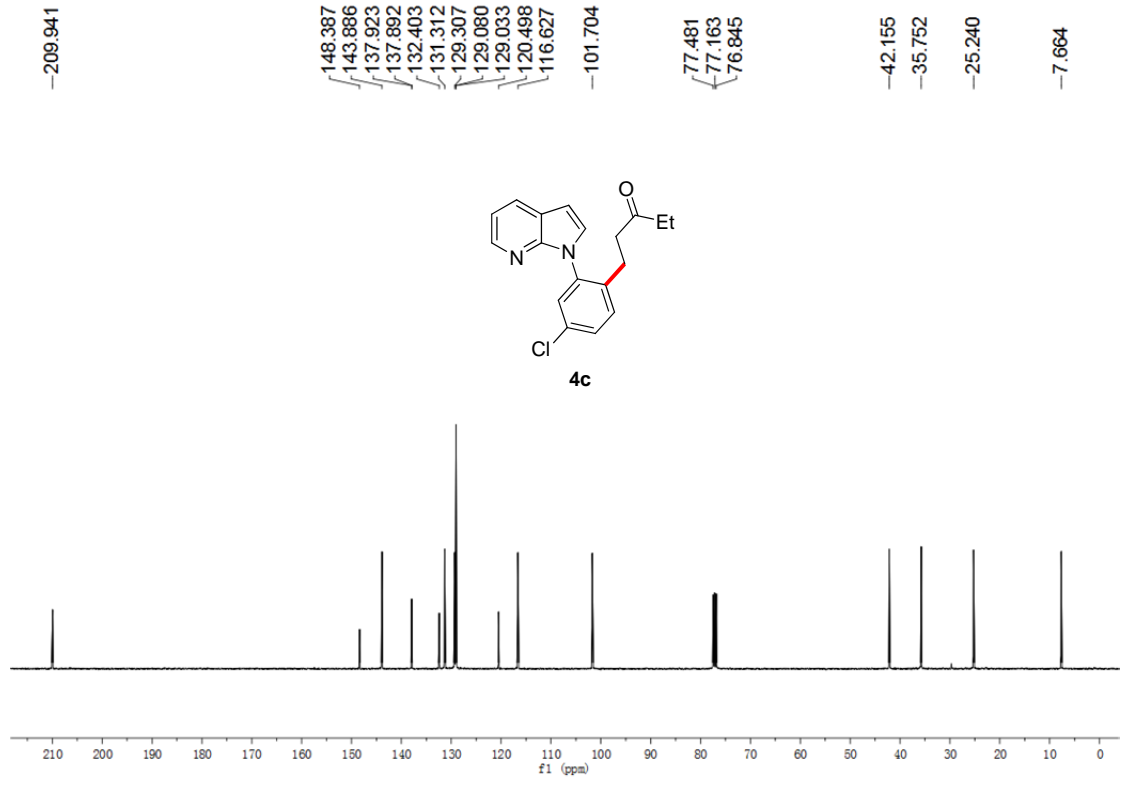

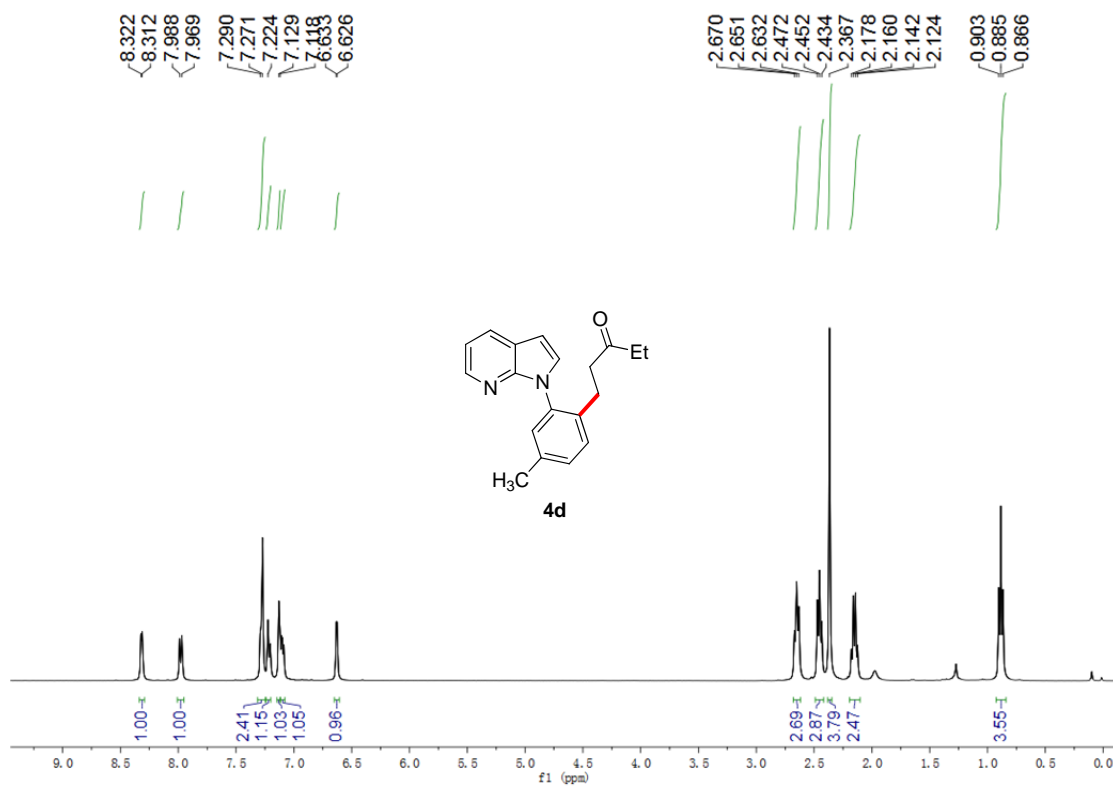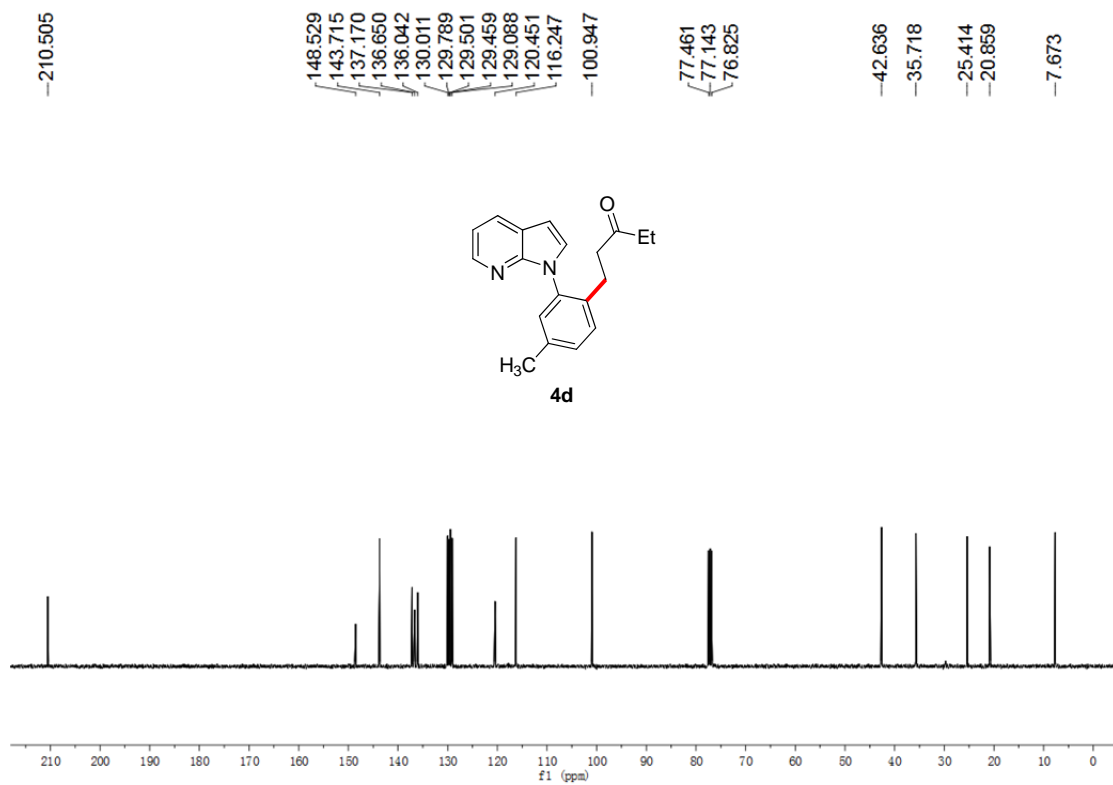

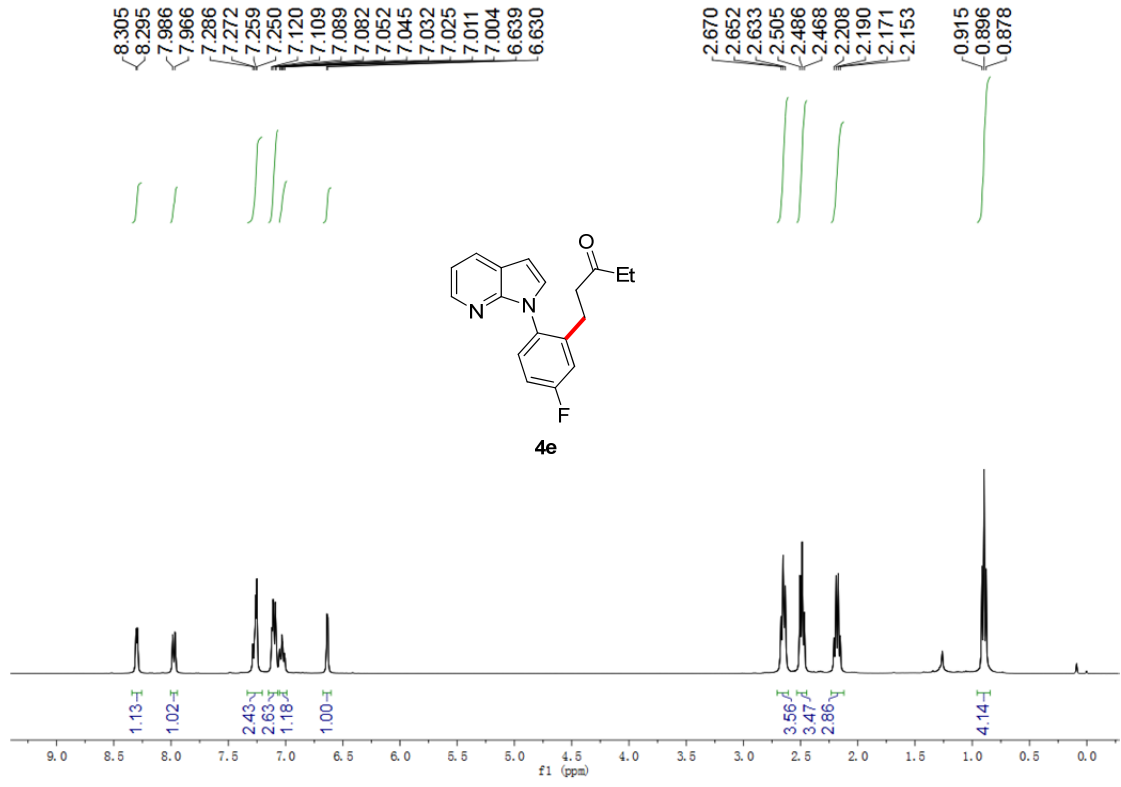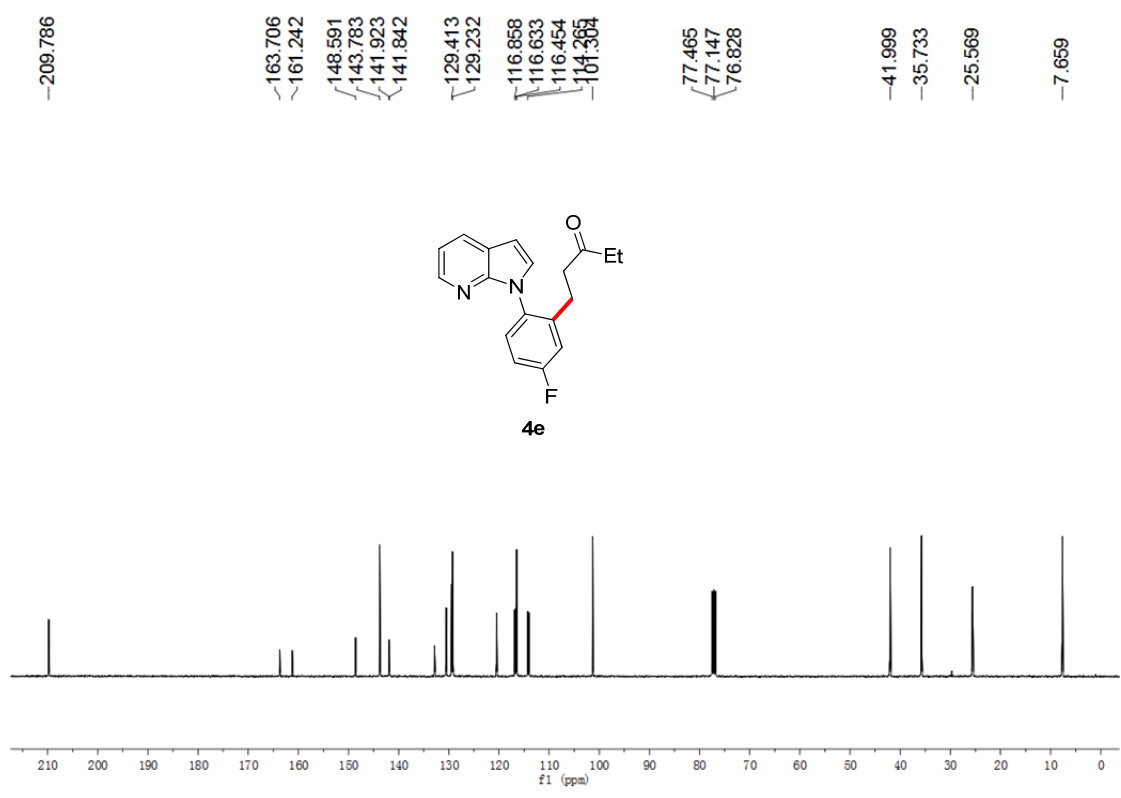

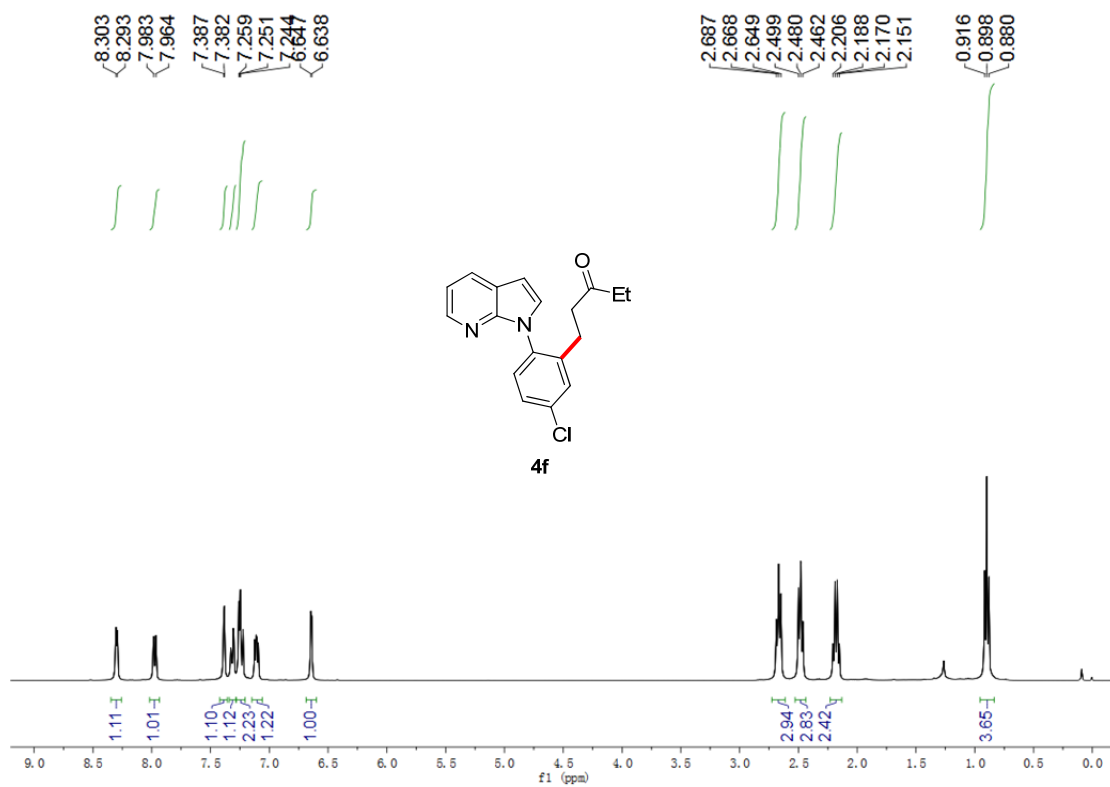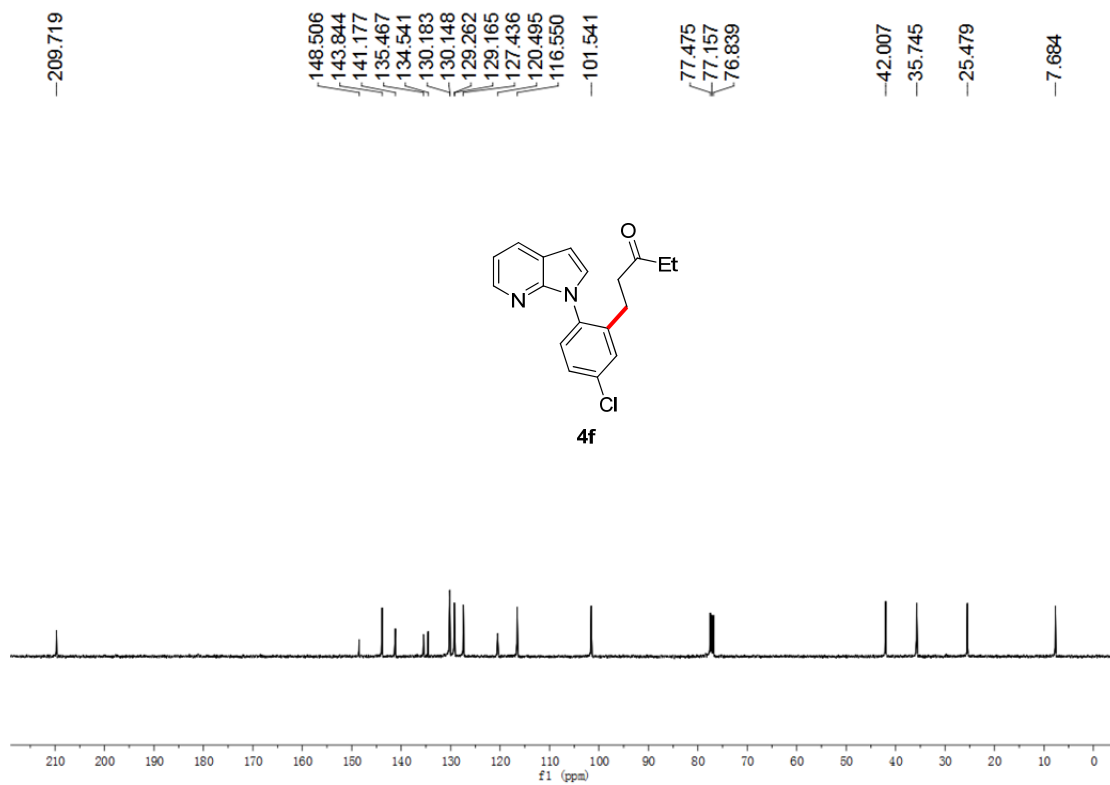

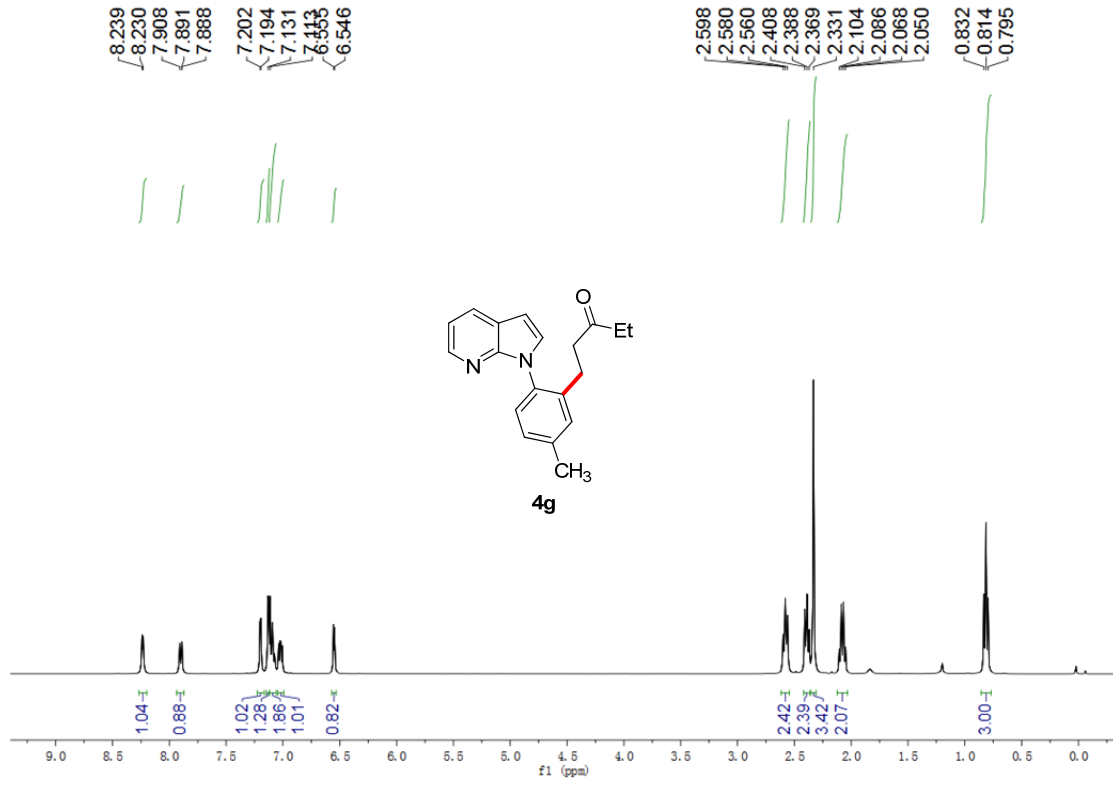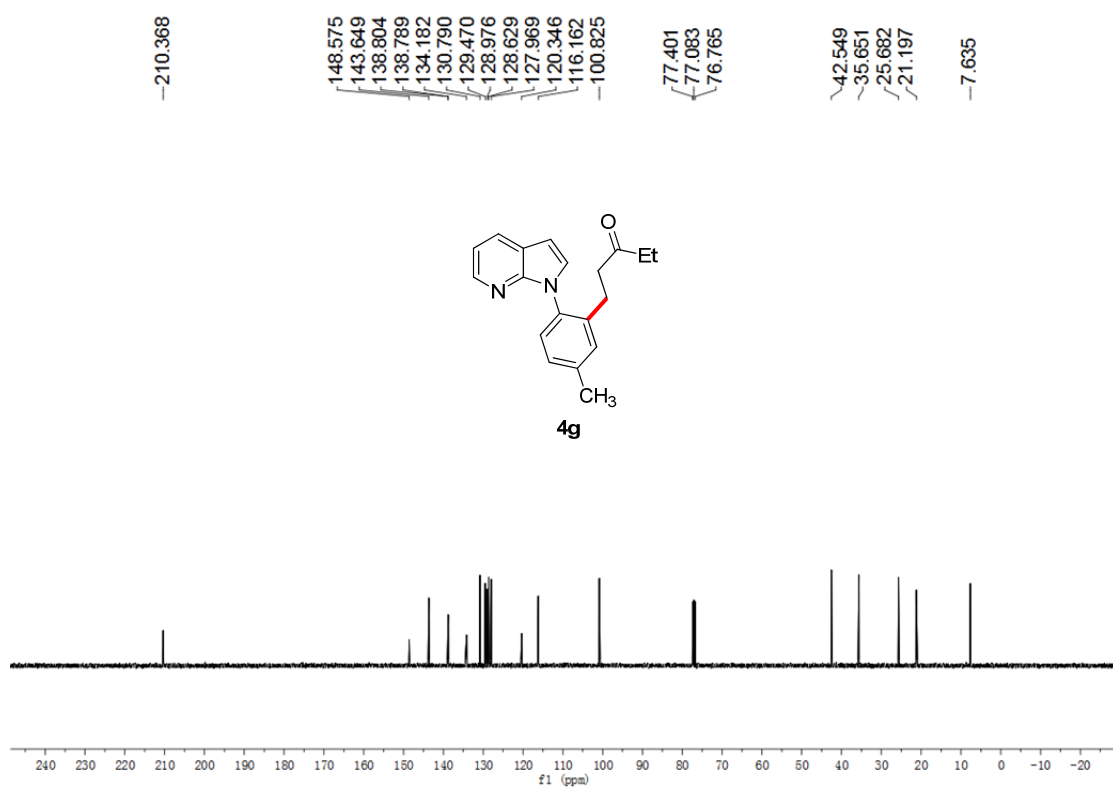

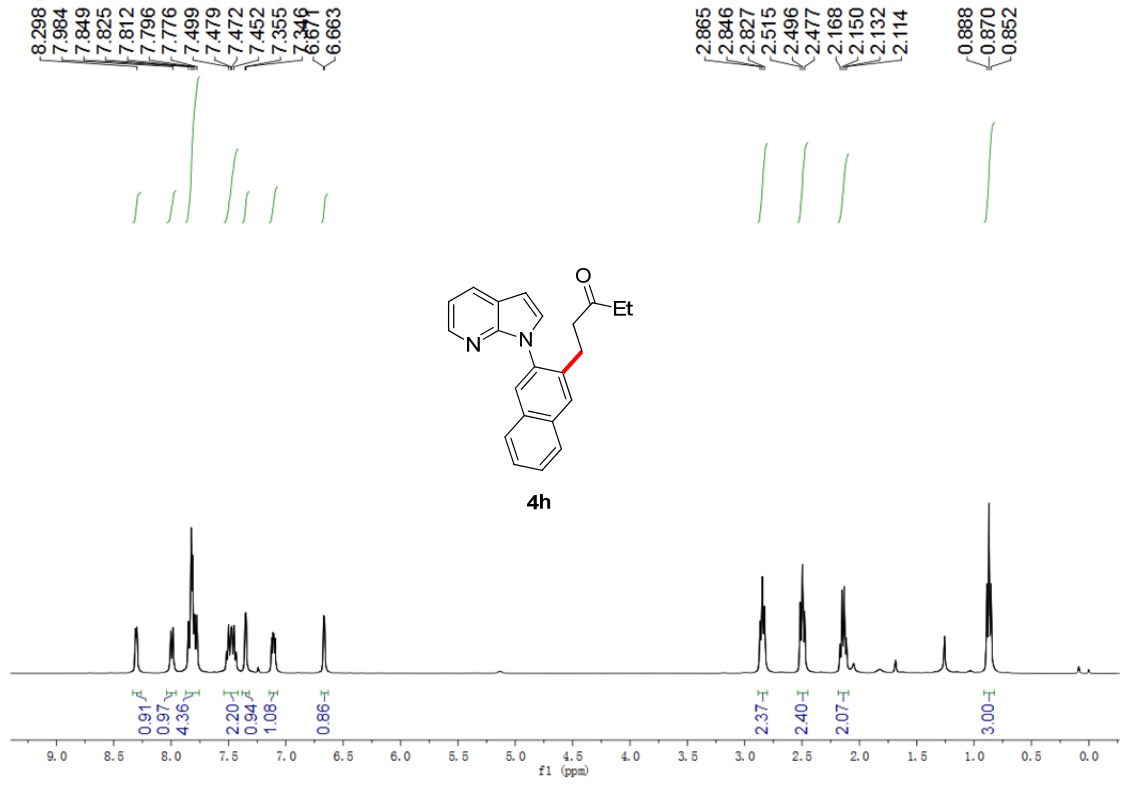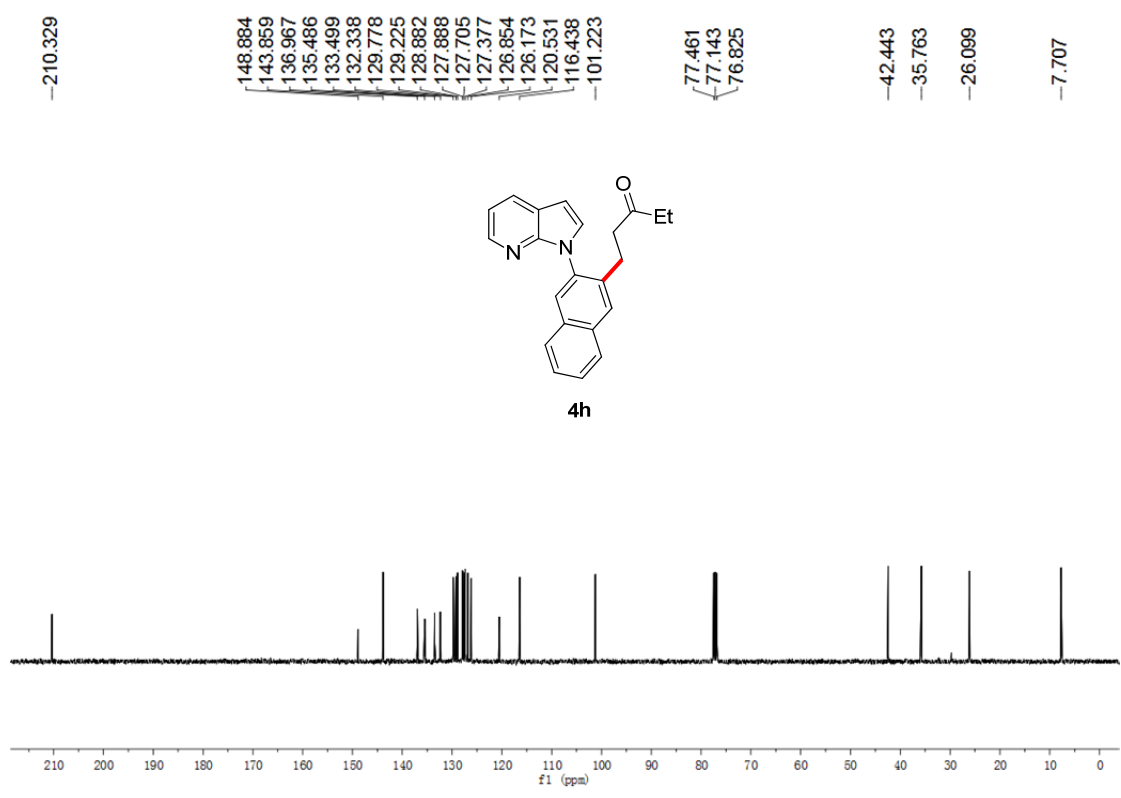

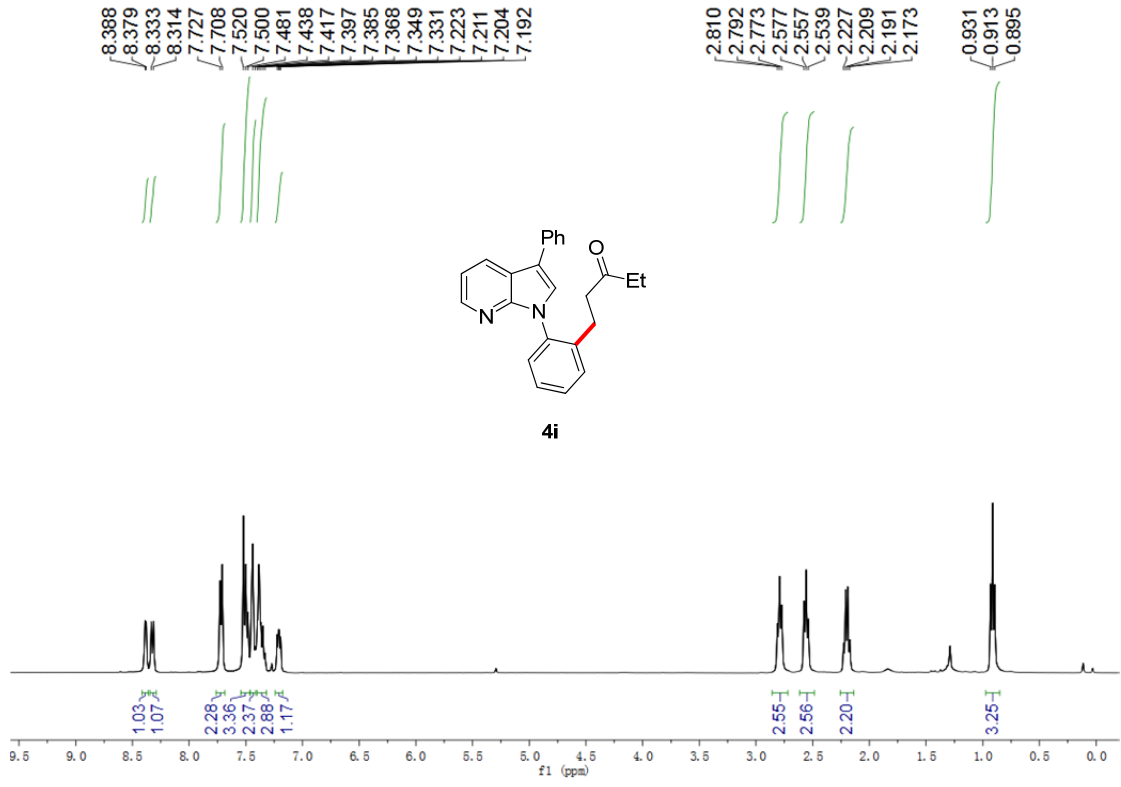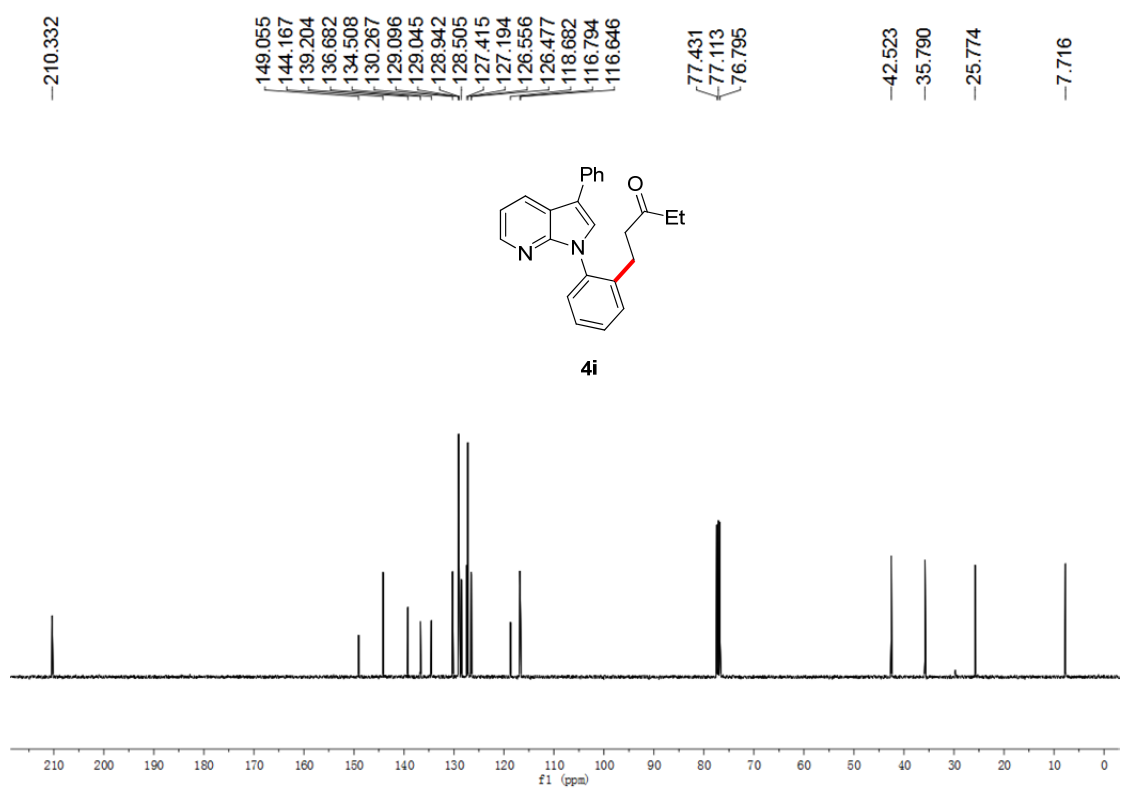

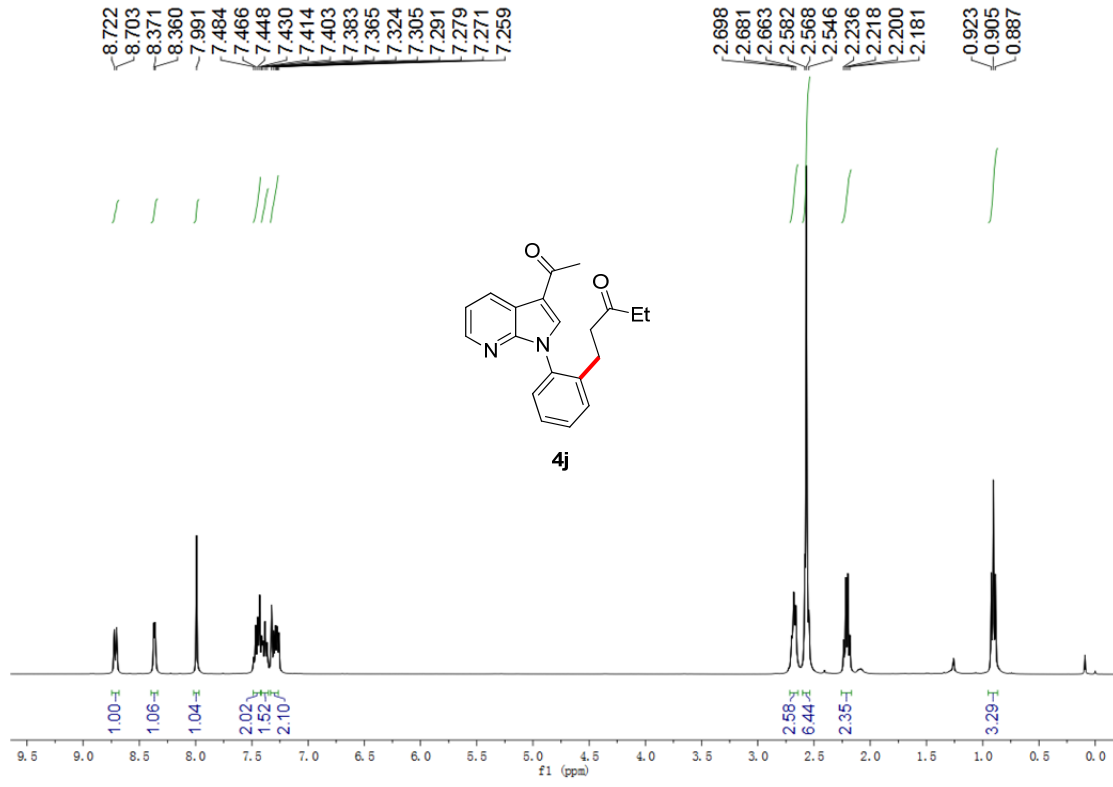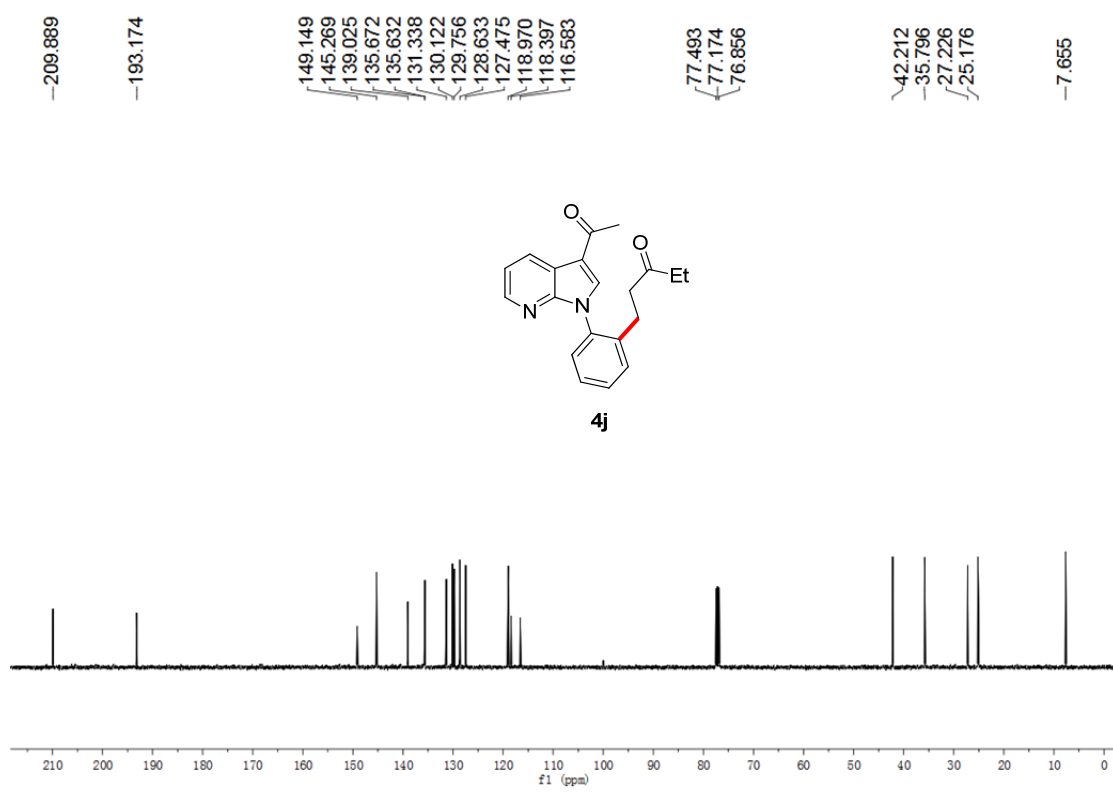



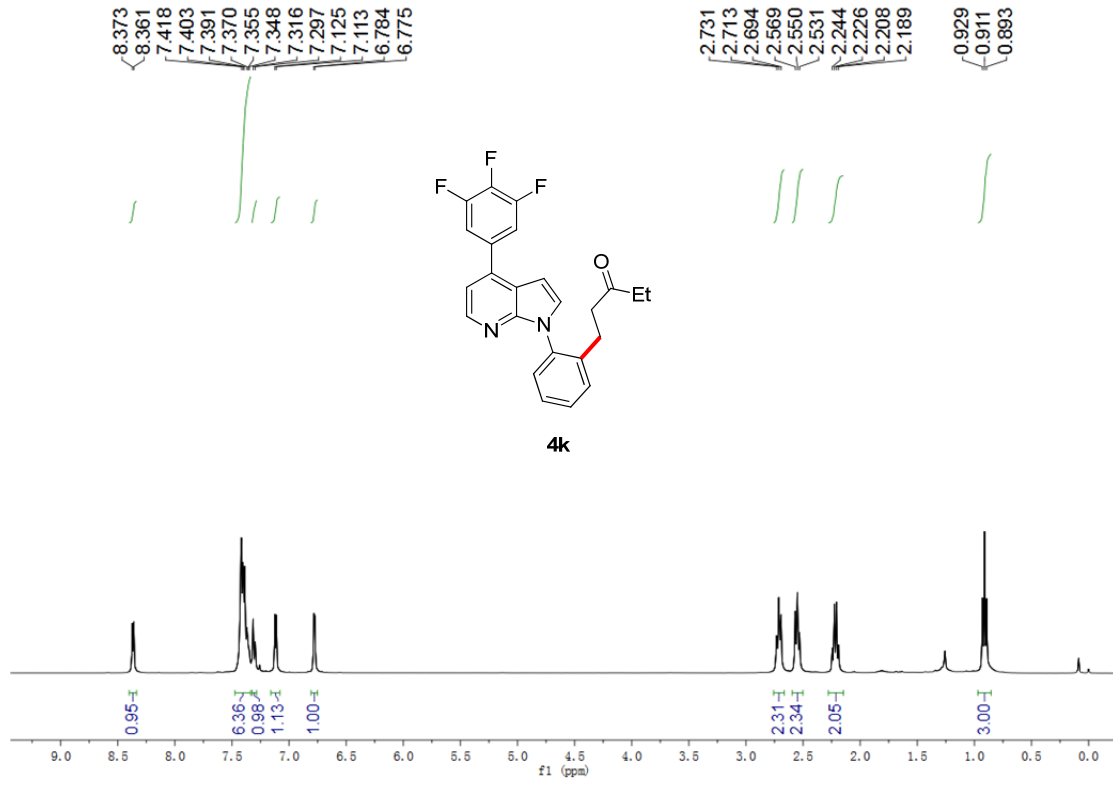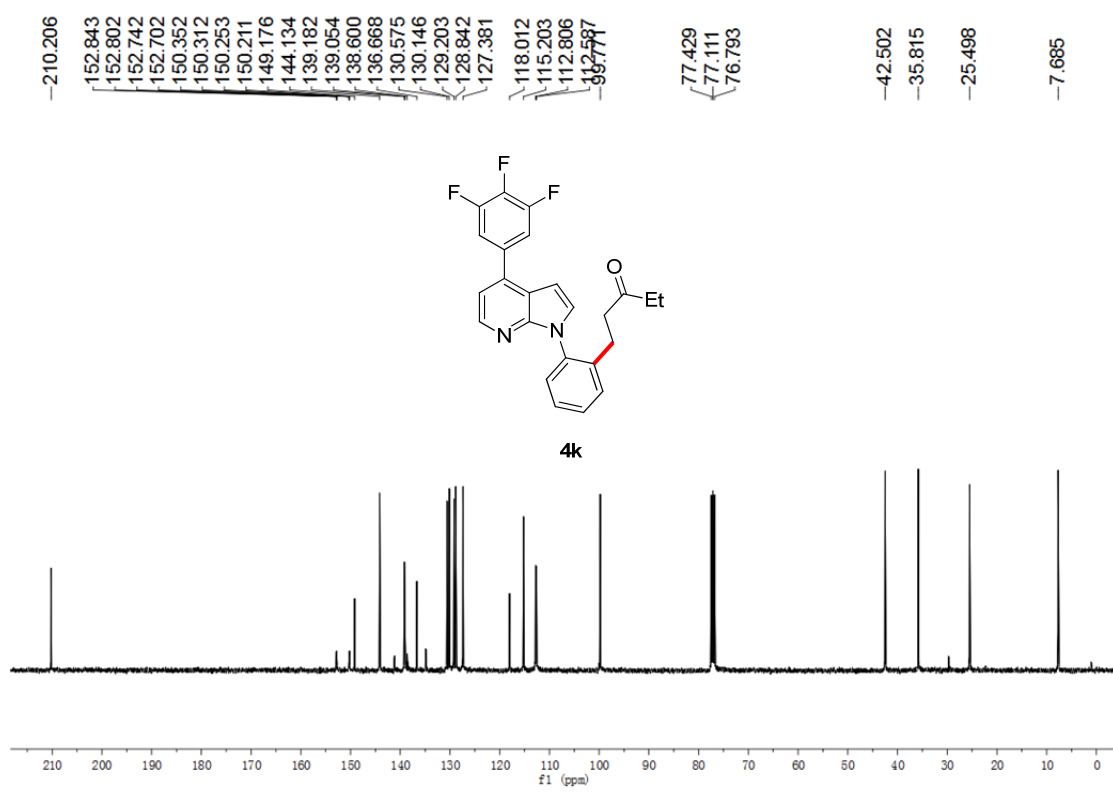

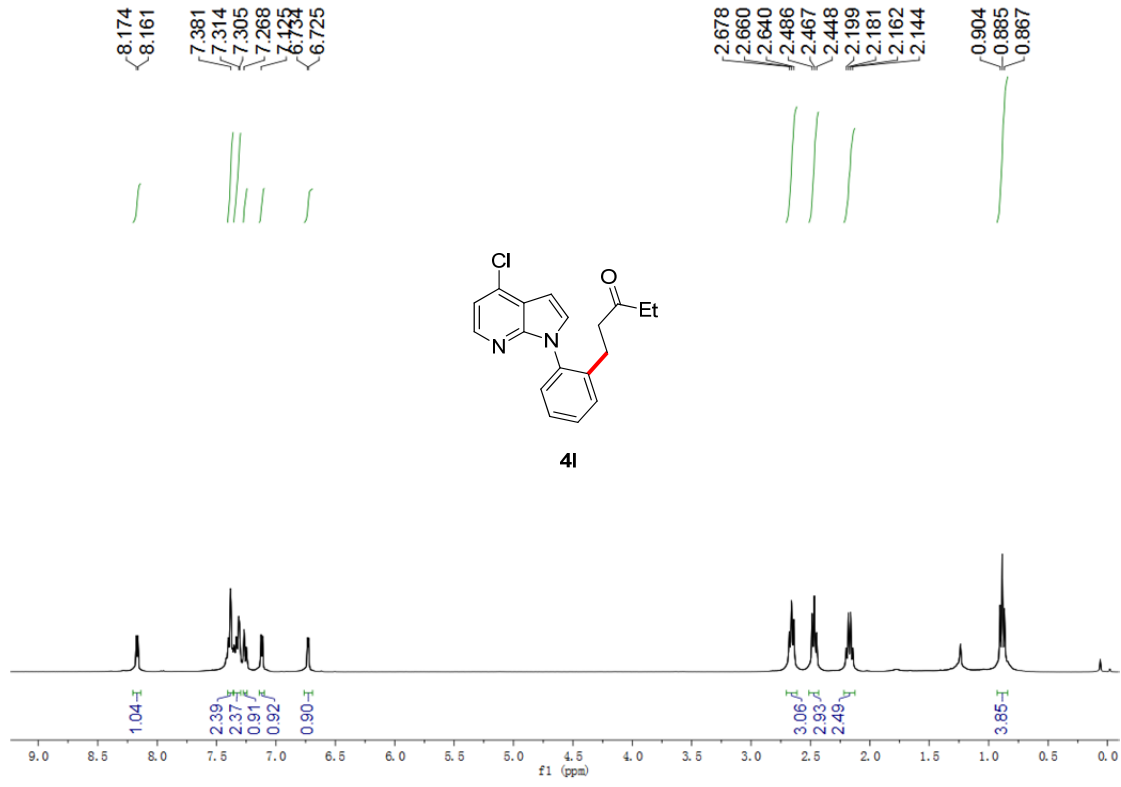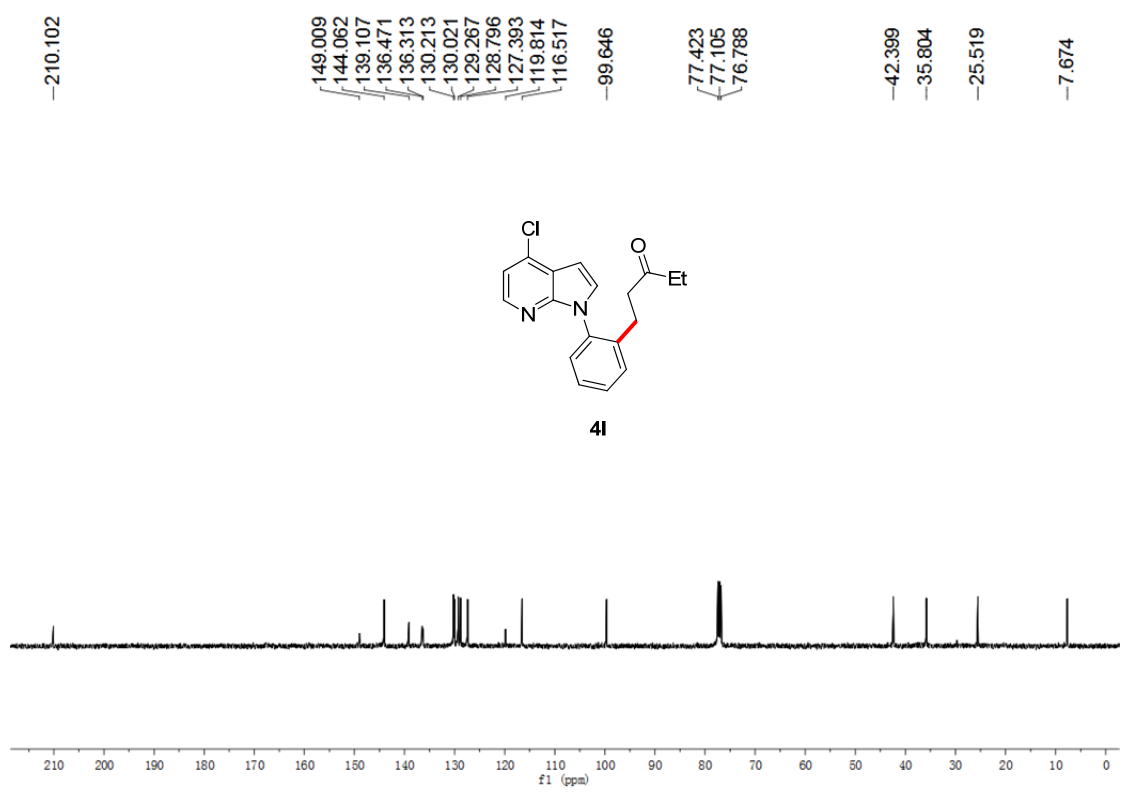

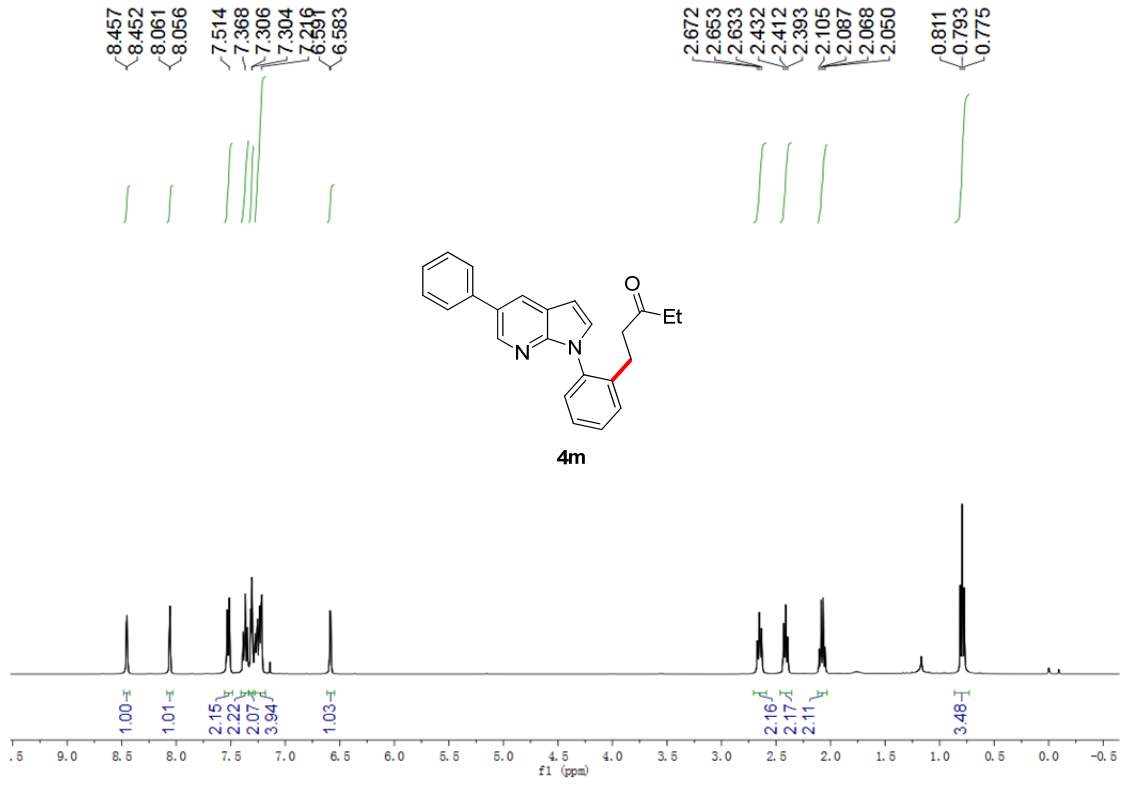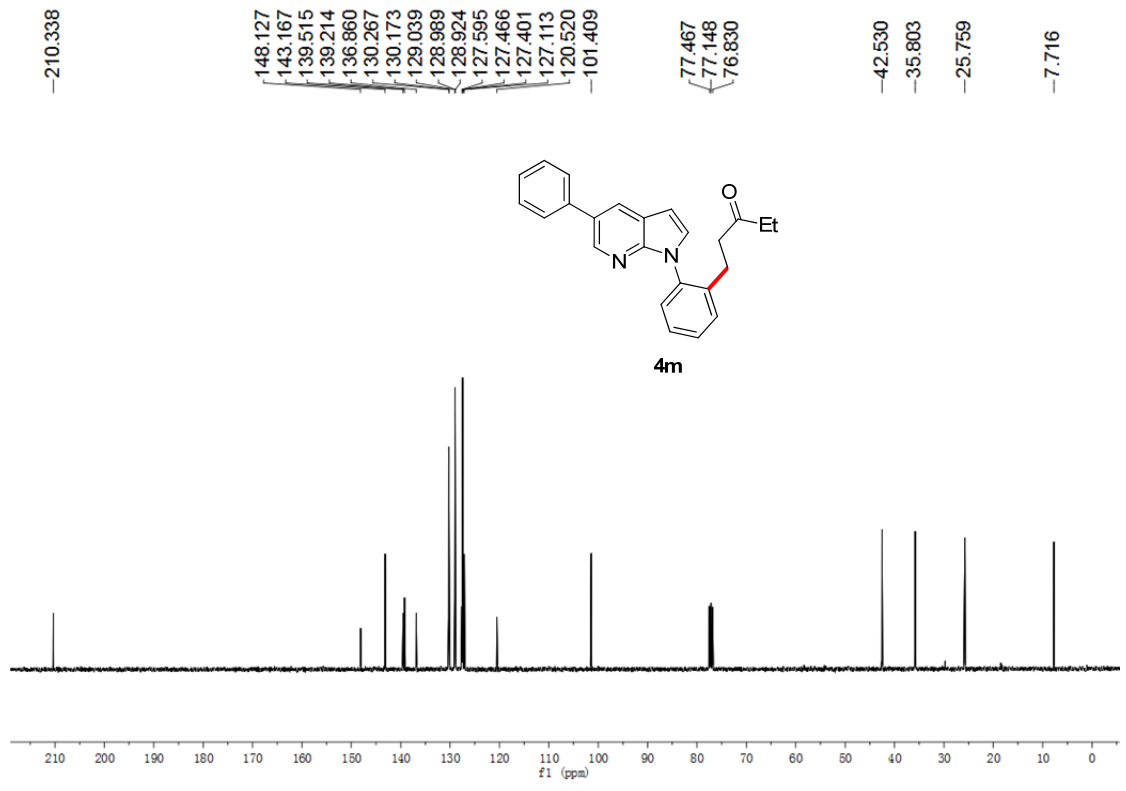

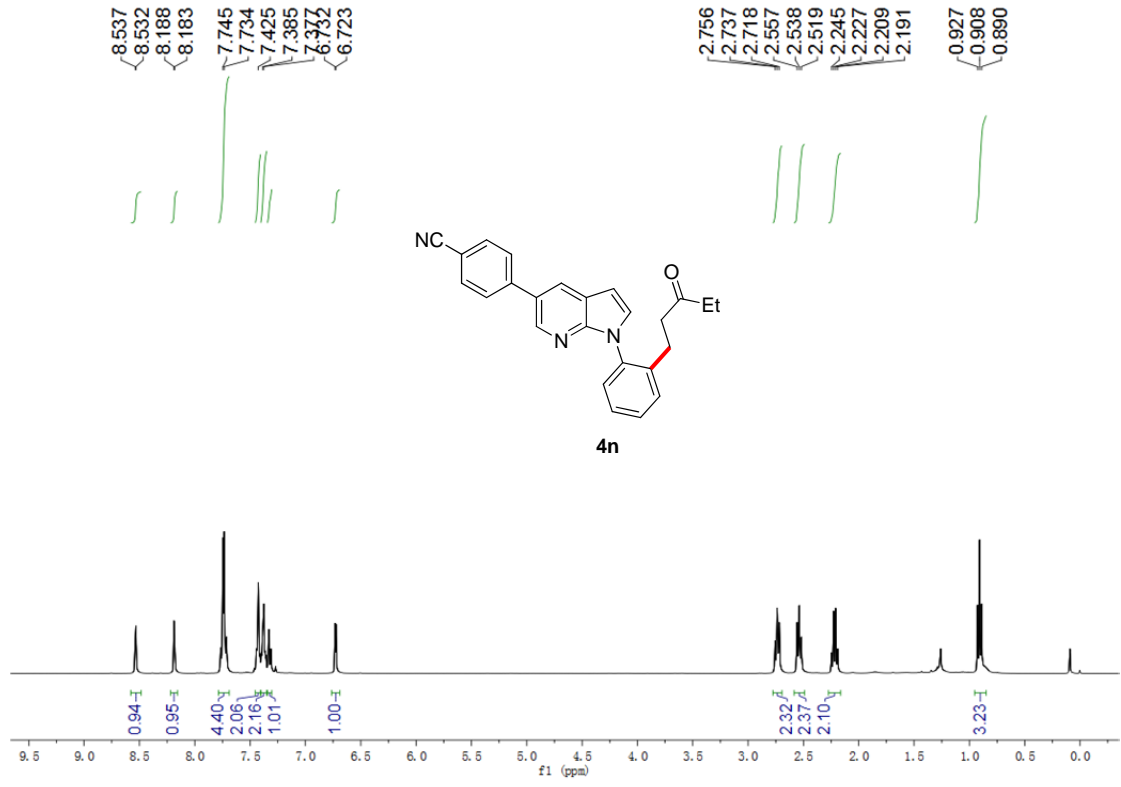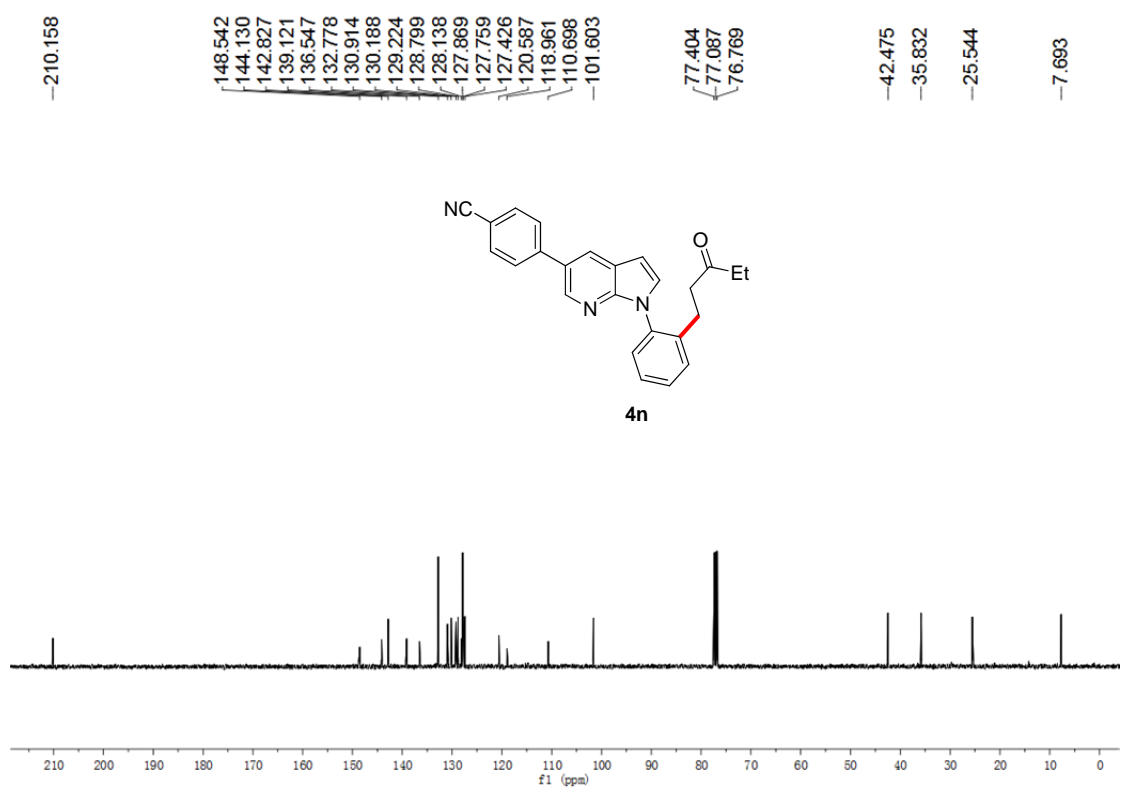

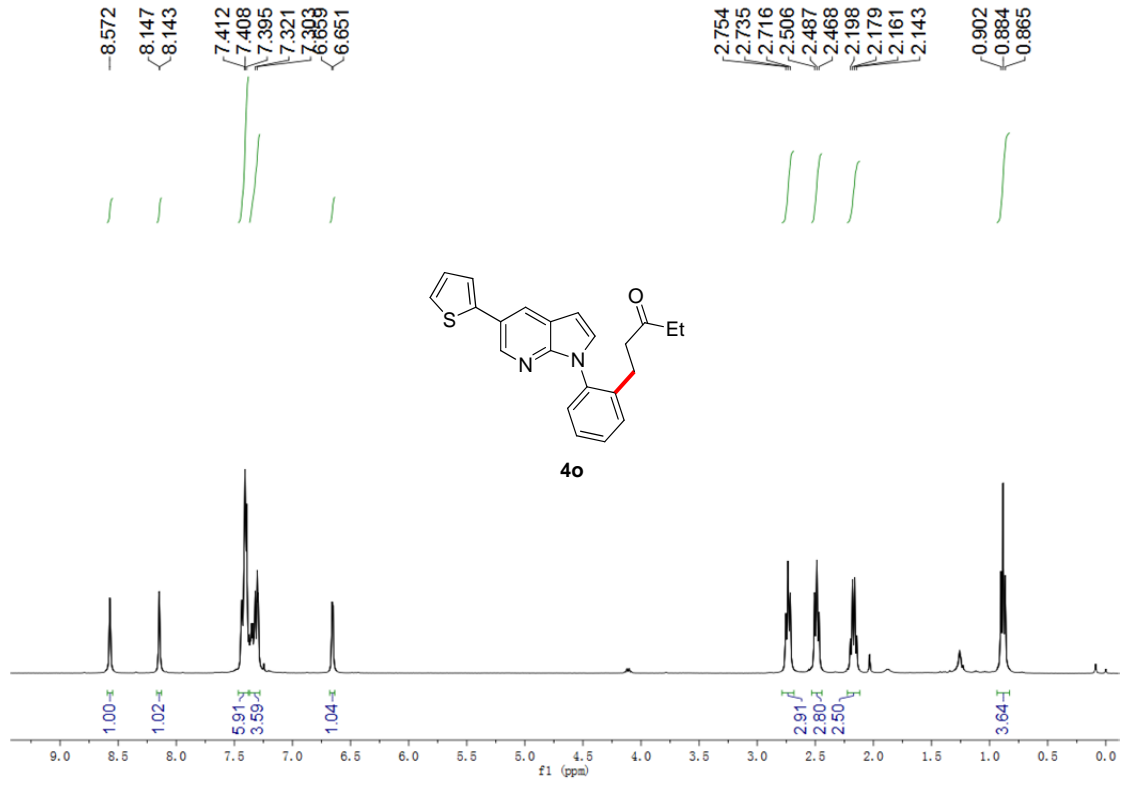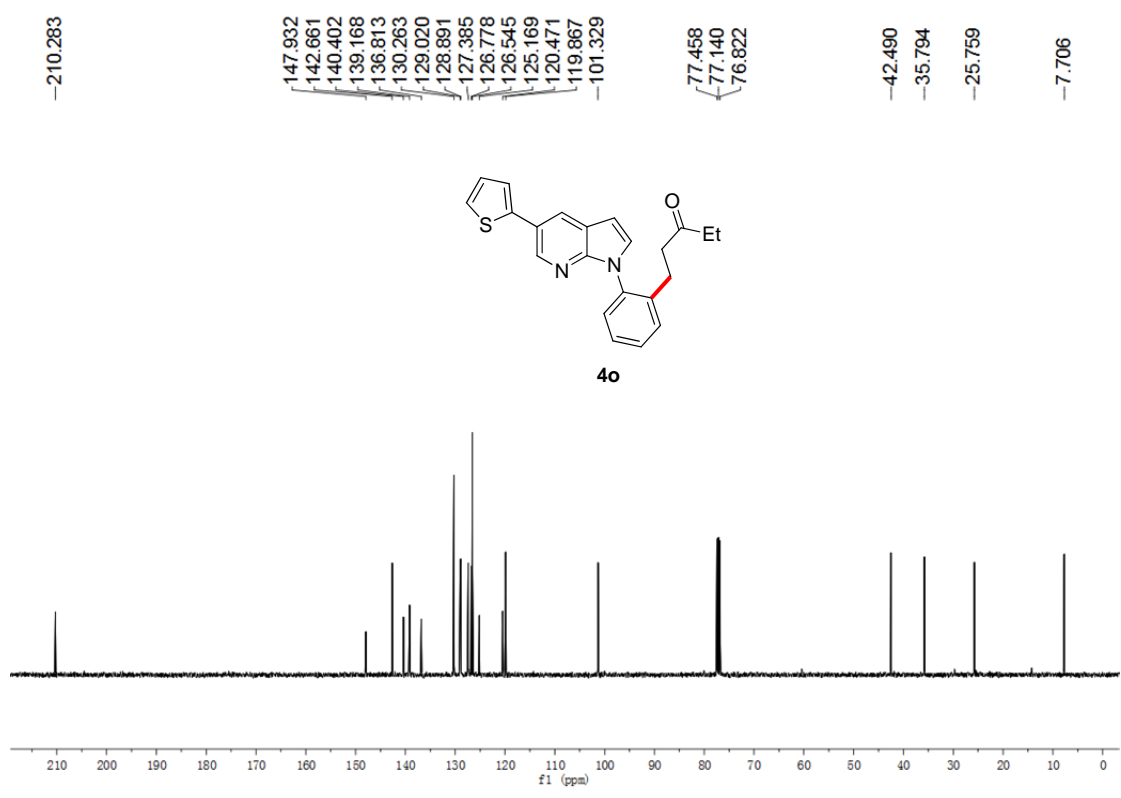

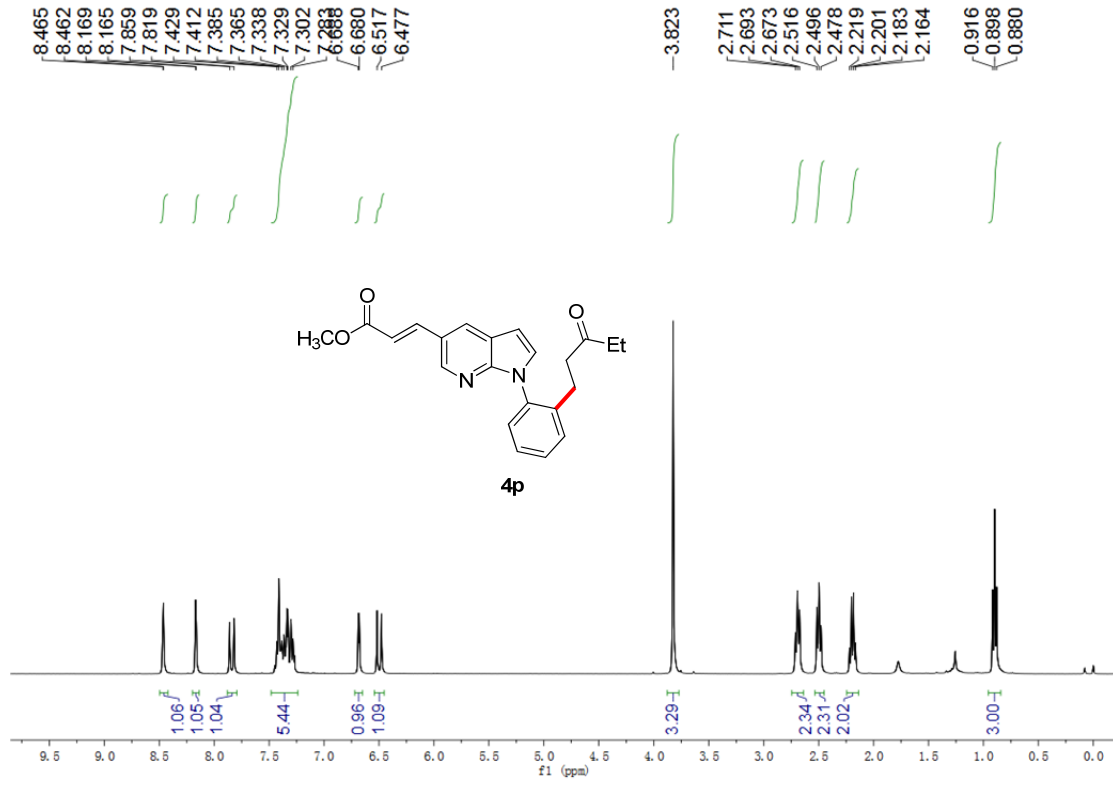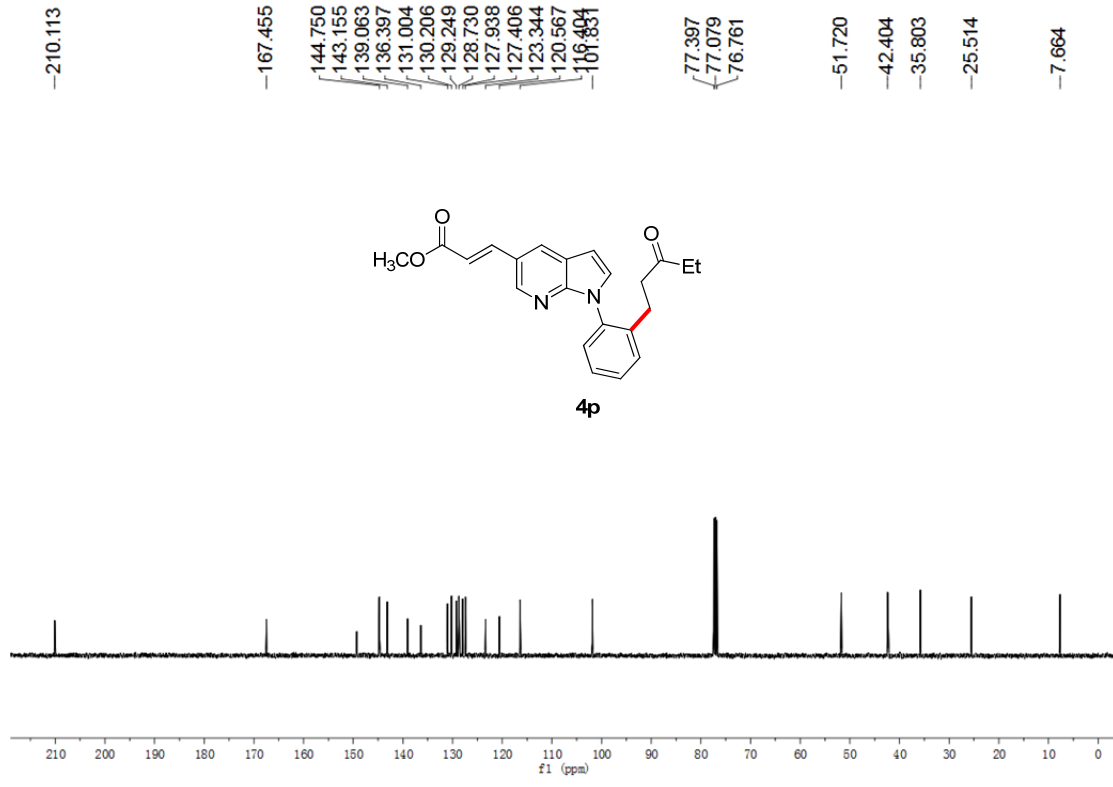

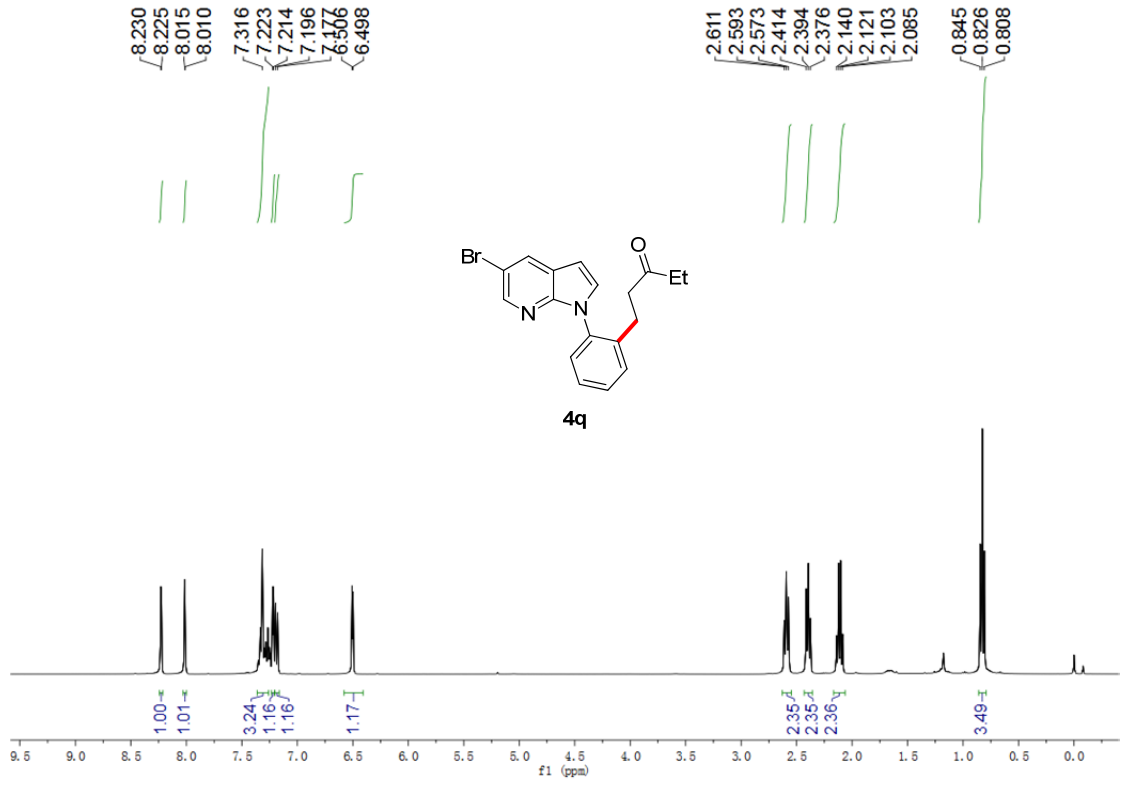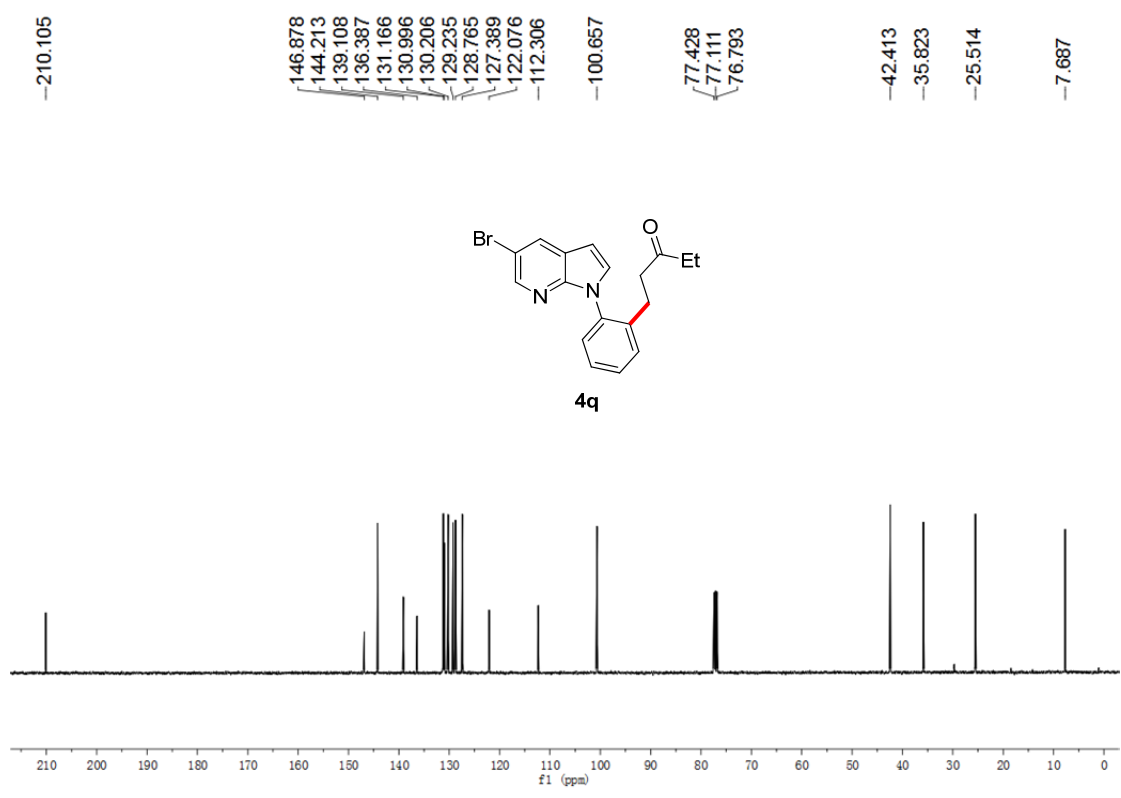

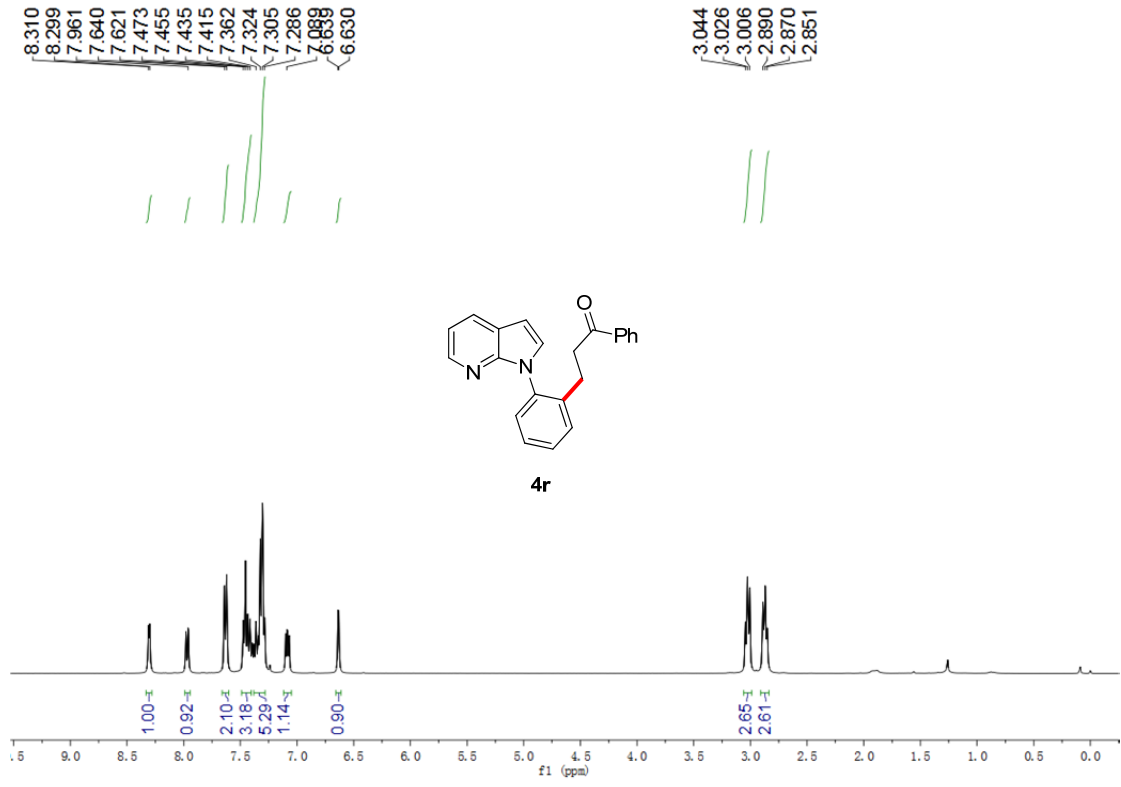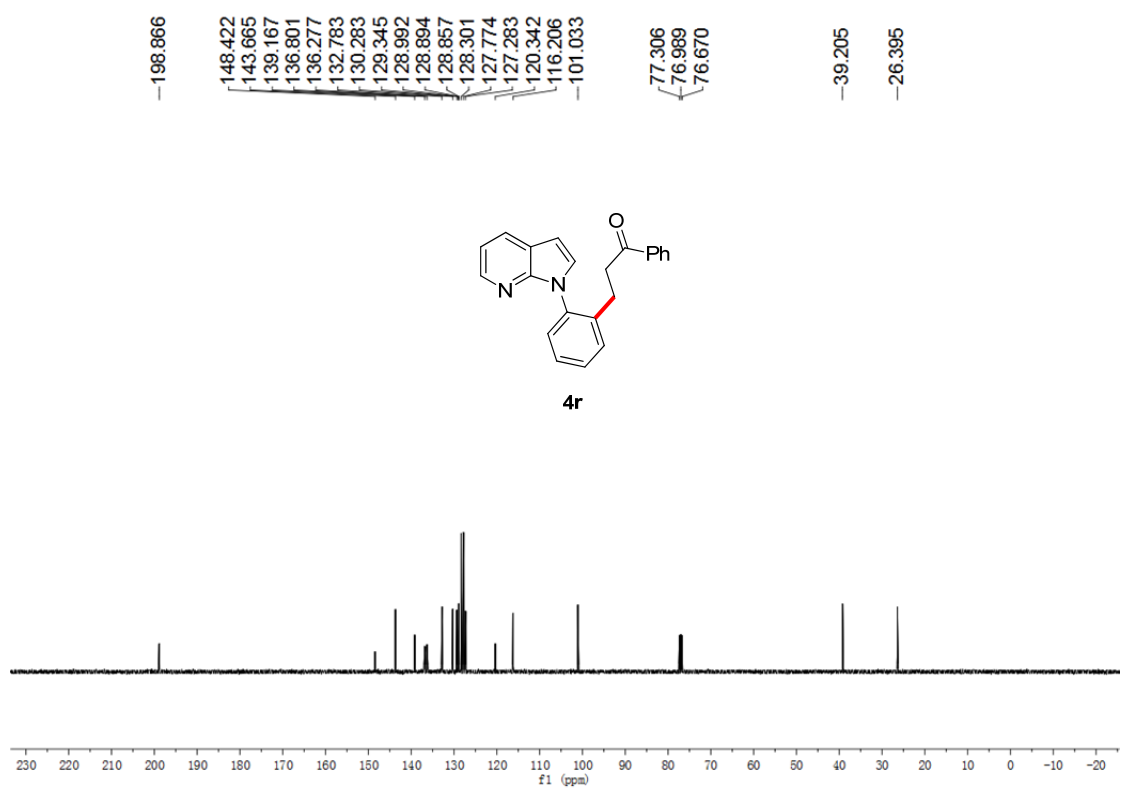



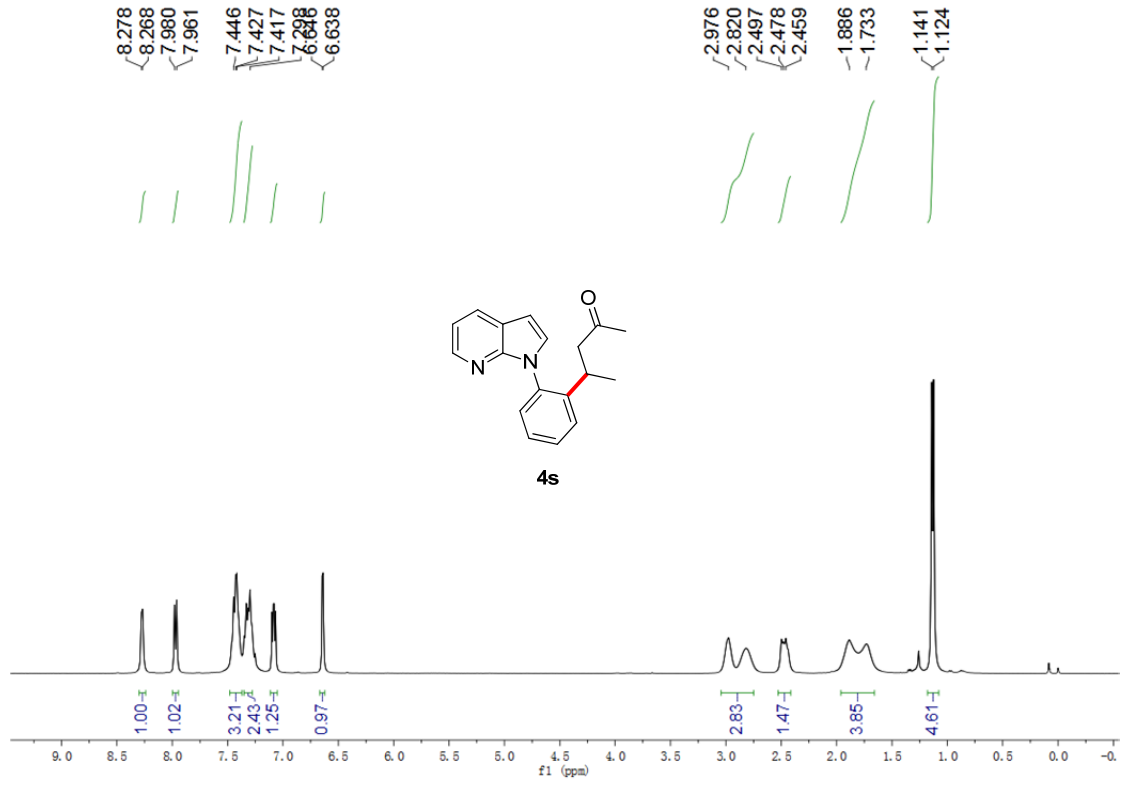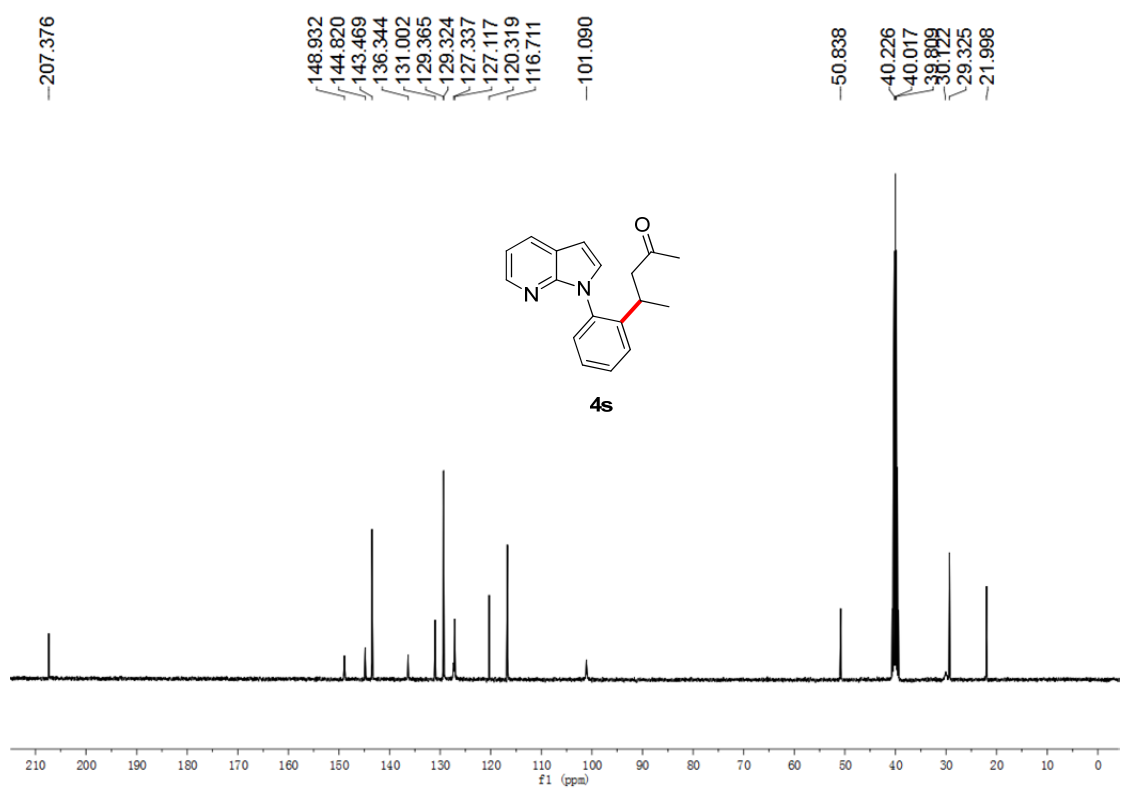

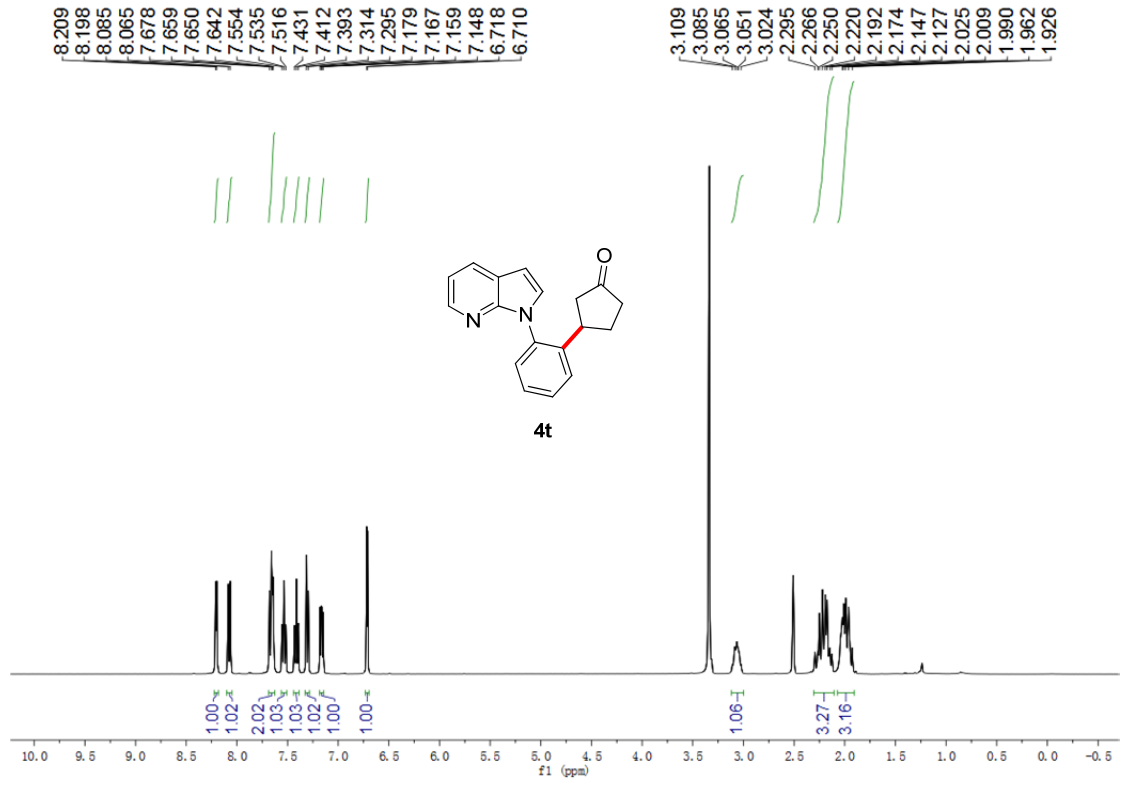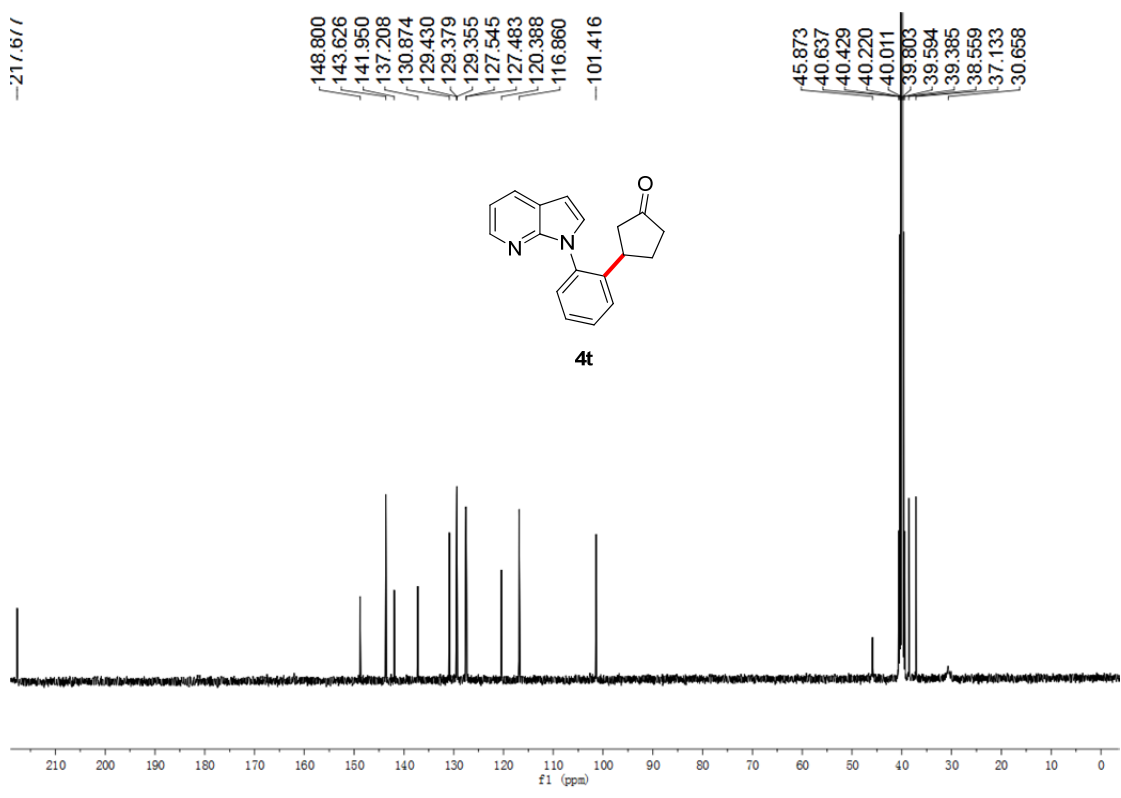

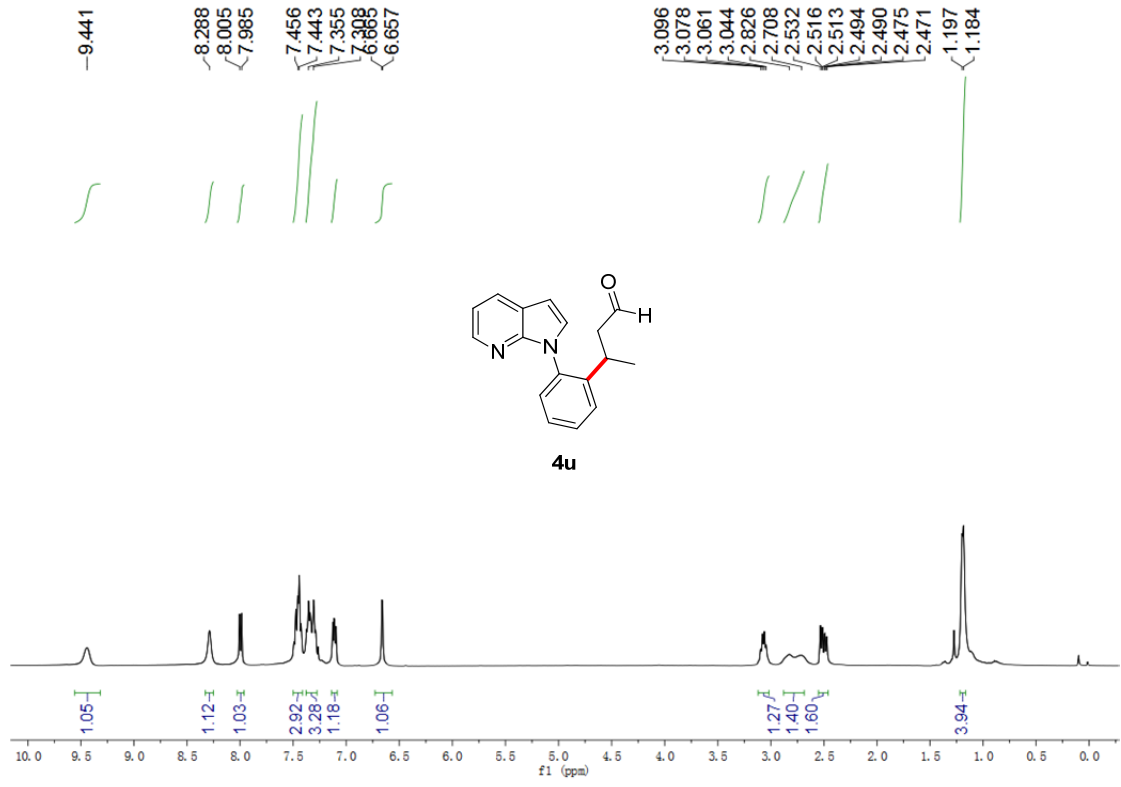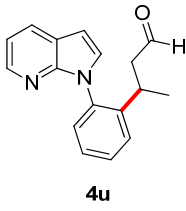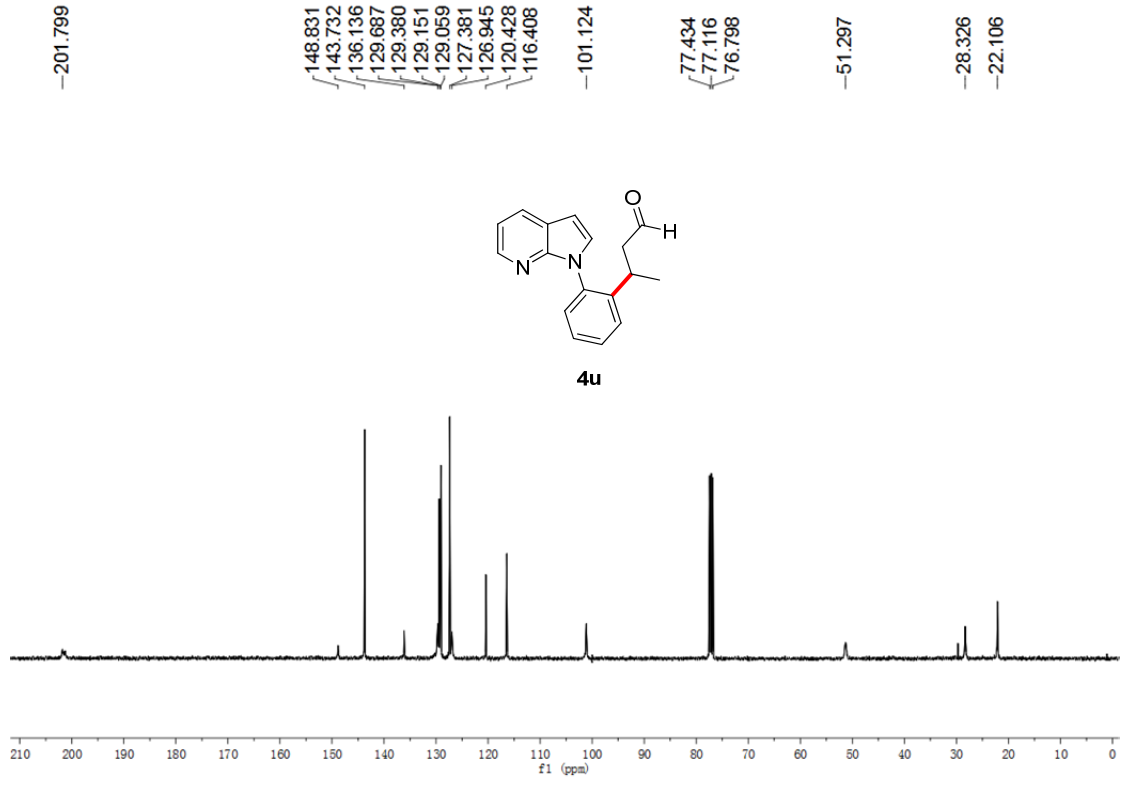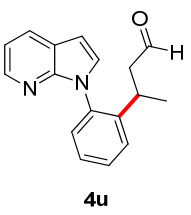

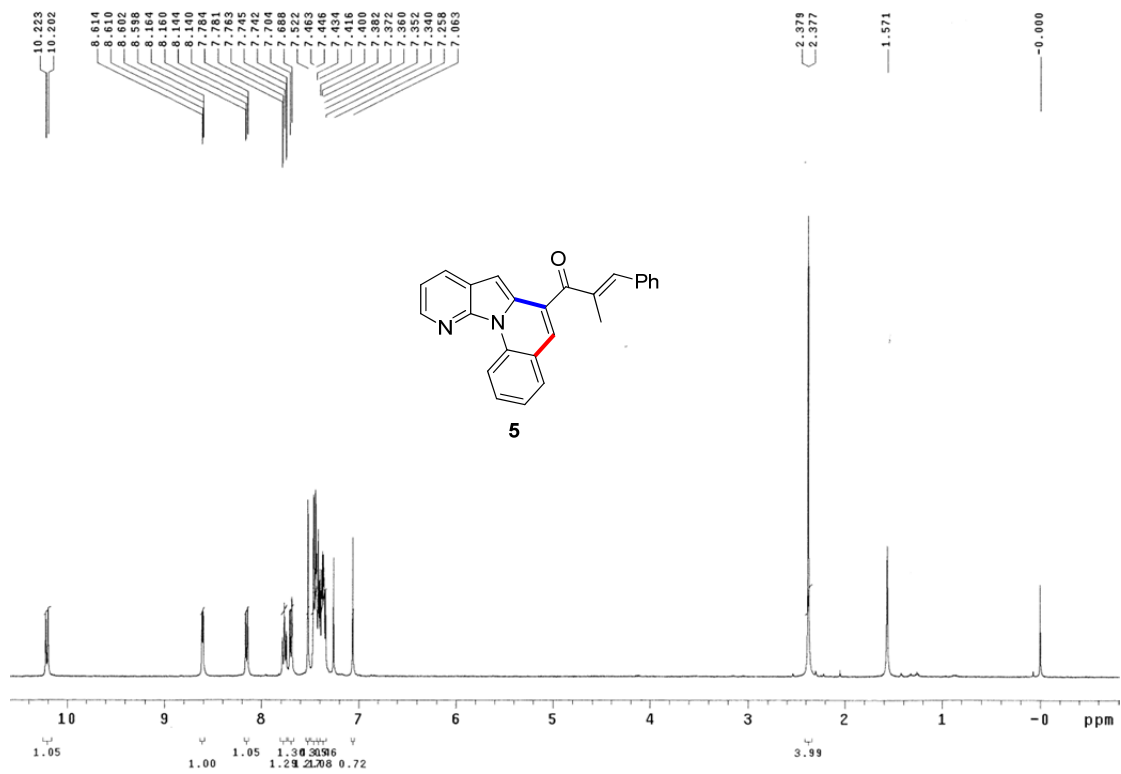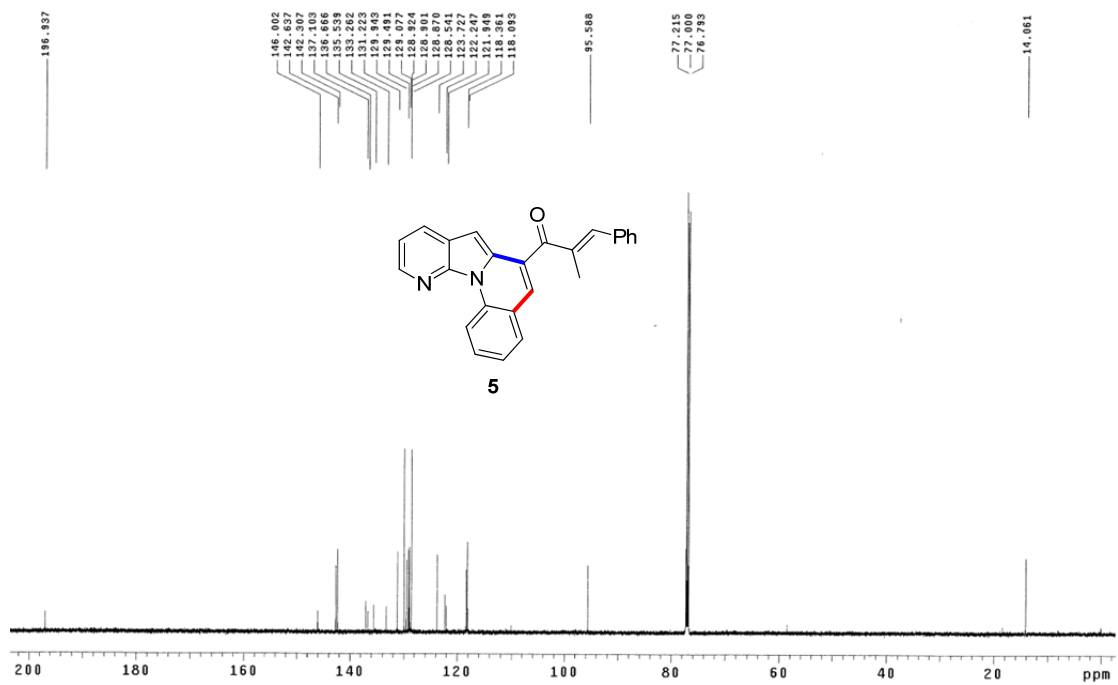

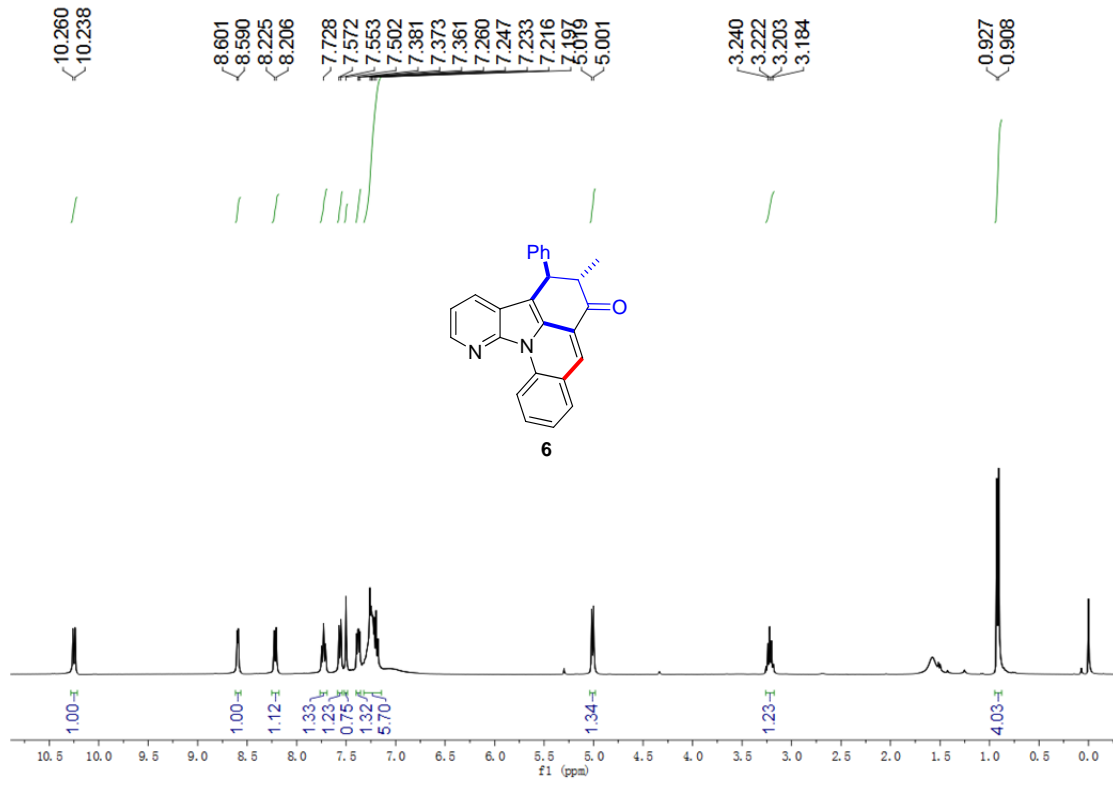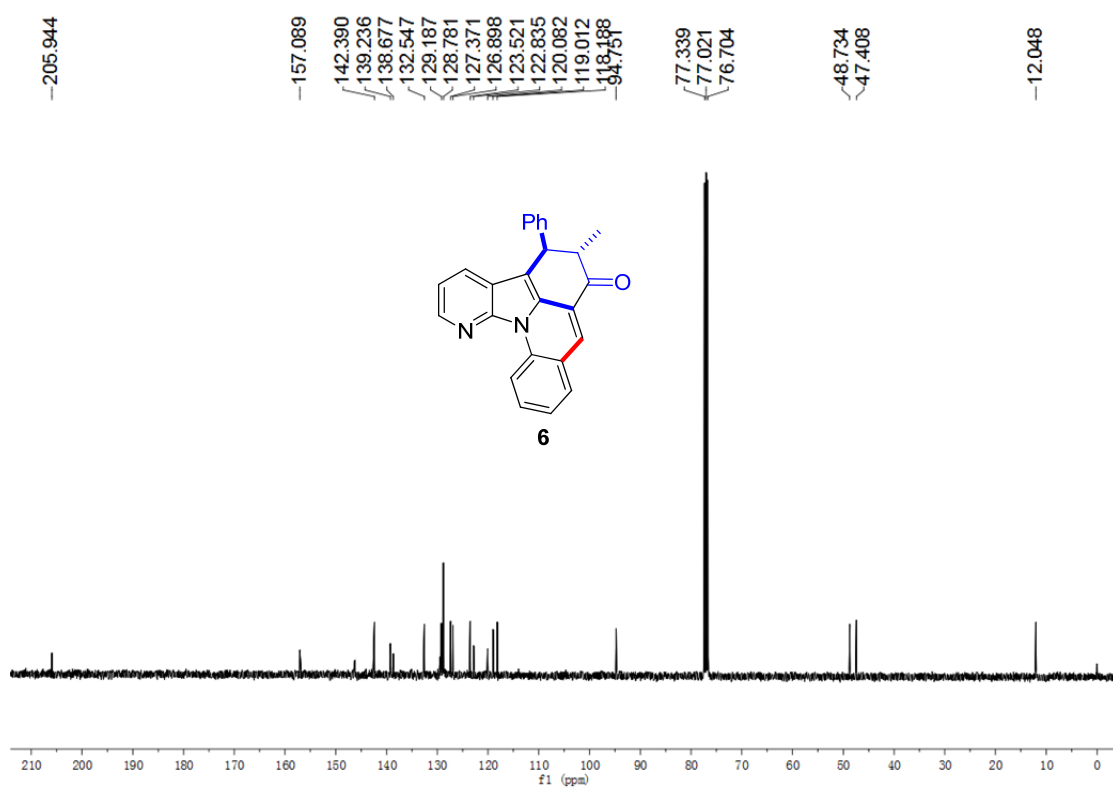

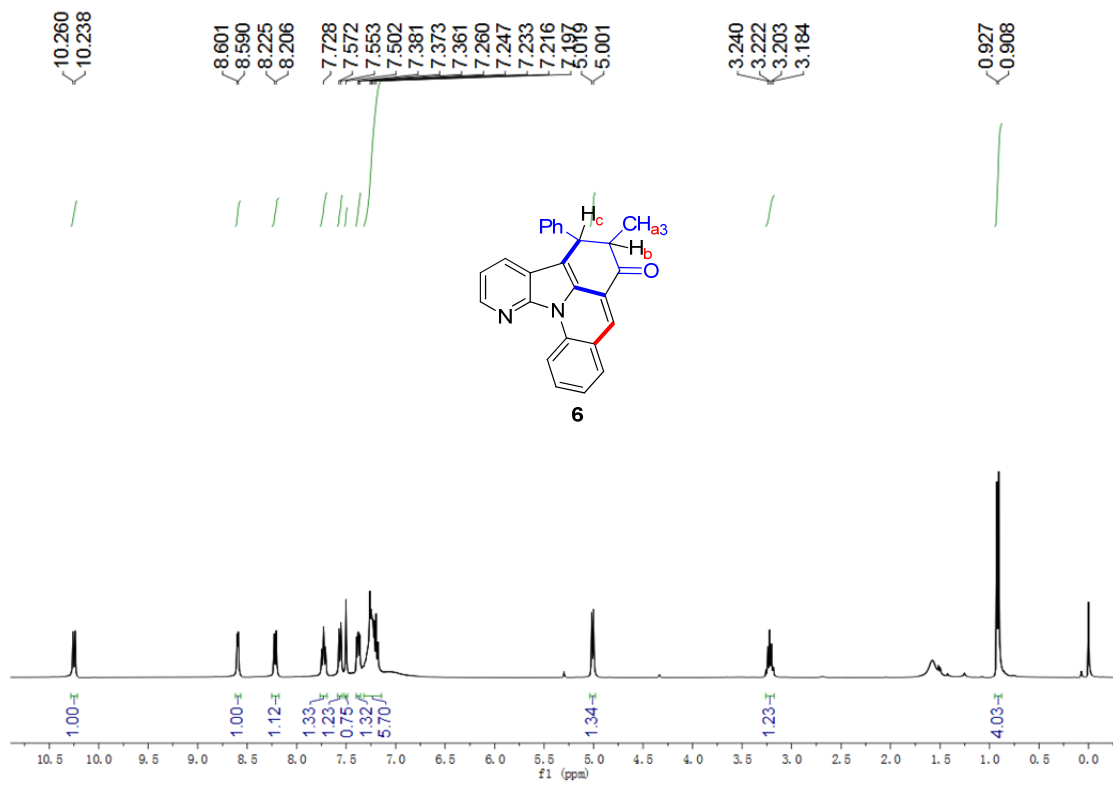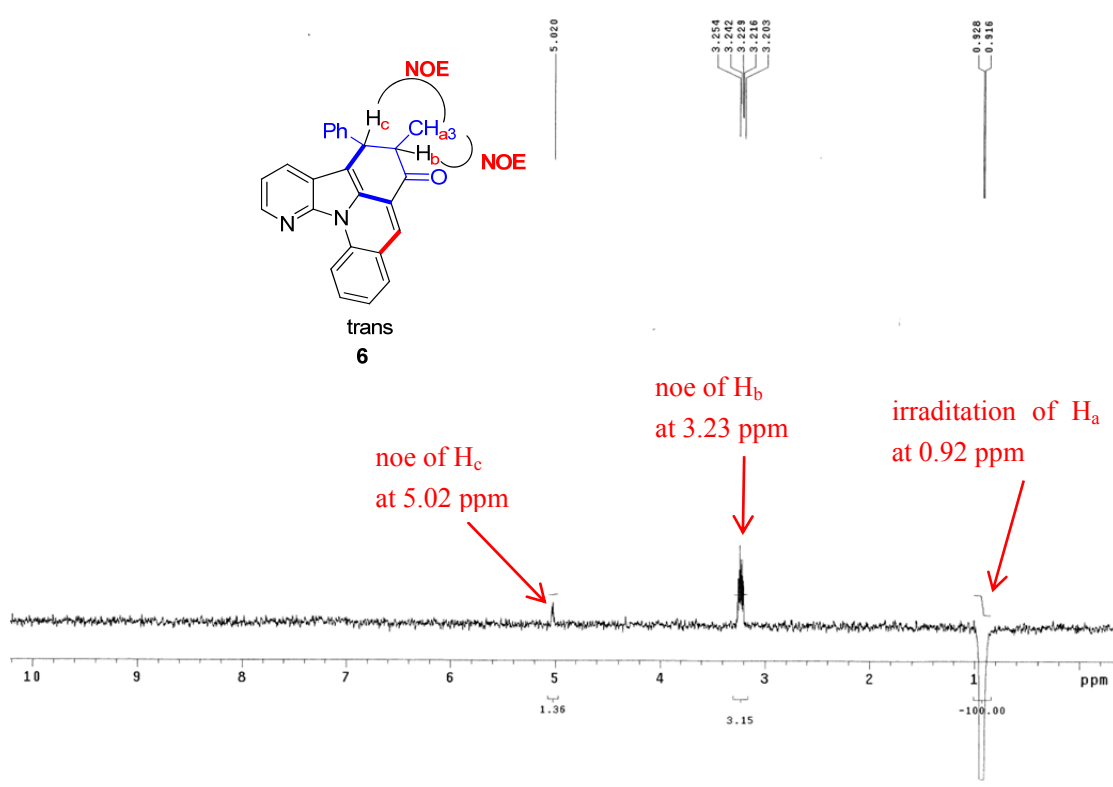

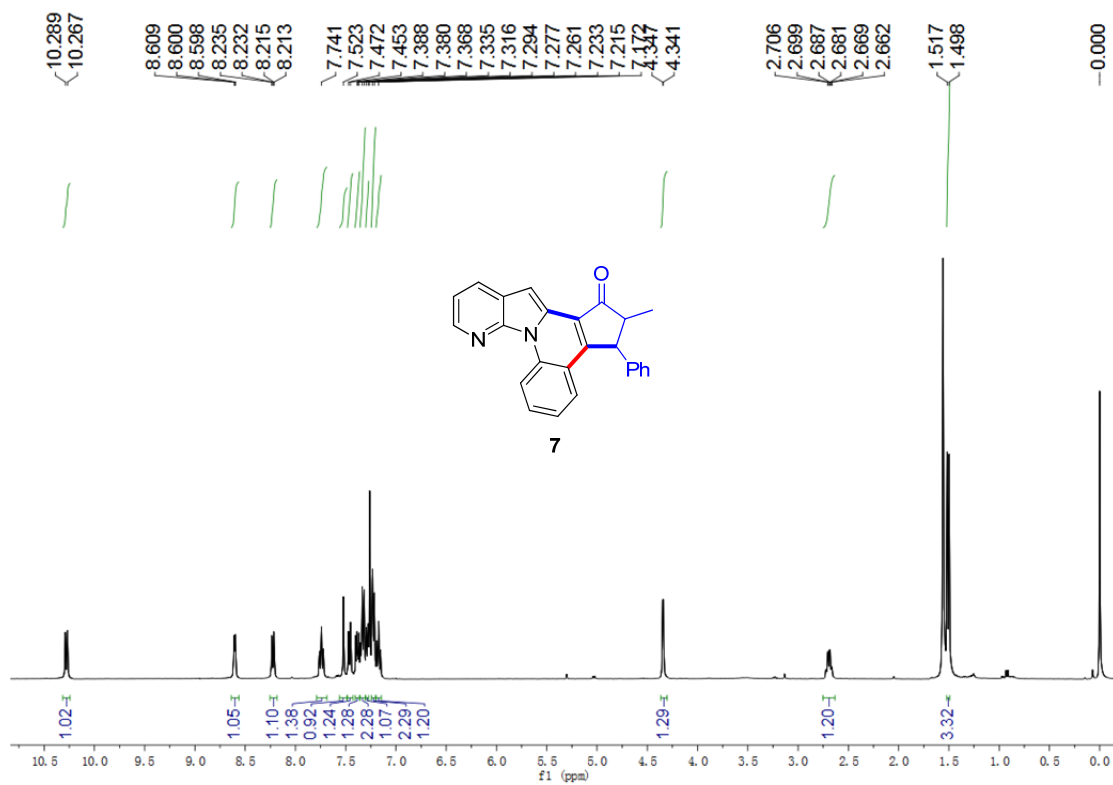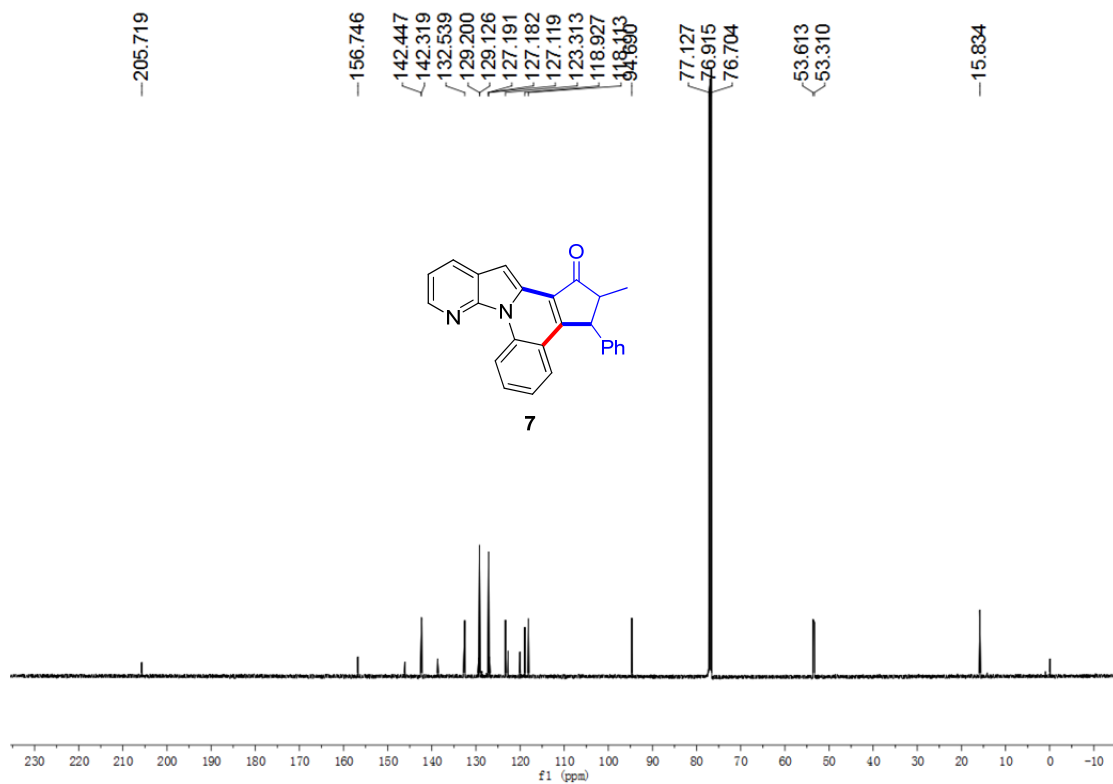

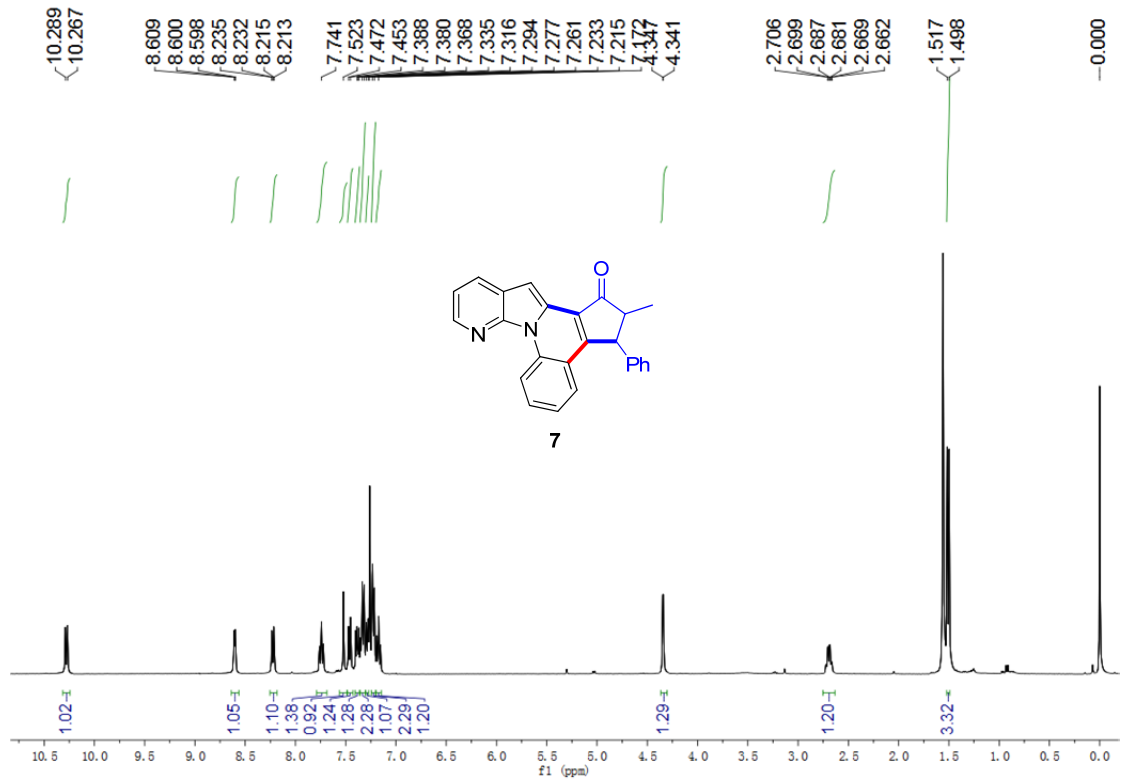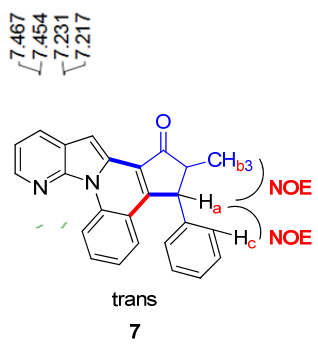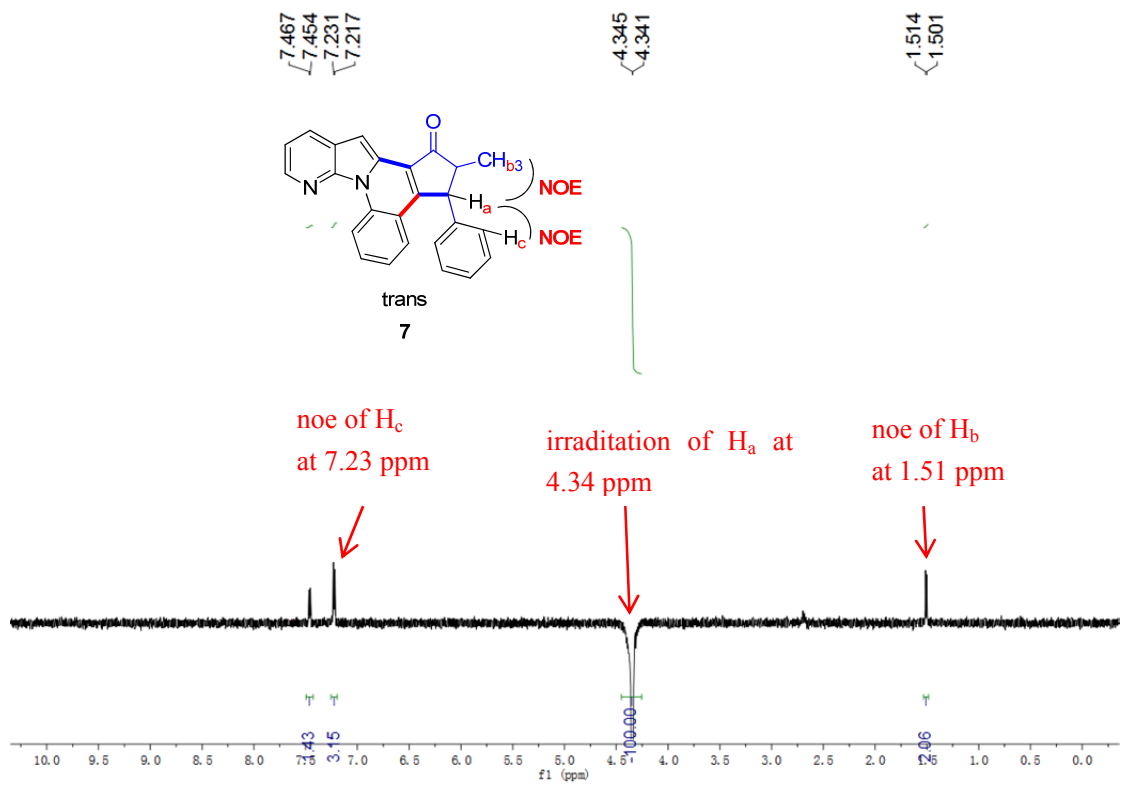

Supplement: c6ob01437b1.pdf [file c6ob01437b1.pdf]
